# Supplementary material for: Dunning rat prostate adenocarcinomas and alternative splicing reporters: powerful tools to study epithelial plasticity in prostate tumors in vivo
Source: PubMed Central journal article supplement — Clin Exp Metastasis. 2008 Jun 4;25(6):611–9. doi: 10.1007/s10585-008-9186-y (PMC2471395; doi:10.1007/s10585-008-9186-y), 2008-06-04
Supplement: 10585_2008_9186_MOESM1_ESM.pdf [file 10585_2008_9186_MOESM1_ESM.pdf]

| Order | Gene Name  | Fold change | homolog_human   | Affy Probe  | Chip  |
|-------|------------|-------------|-----------------|-------------|-------|
| 1566  | Rn30009577 | 0.000454    | ENSG00000099812 | 212925_at   | U133A |
| 1563  | Rn30018124 | 0.000558    | ENSG00000102886 | 210396_s_at | U133A |
| 1563  | Rn30018124 | 0.000558    | ENSG00000102886 | 219722_s_at | U133A |
| 1563  | Rn30018124 | 0.000558    | ENSG00000102886 | 210396_s_at | U133A |
| 1563  | Rn30018124 | 0.000558    | ENSG00000102886 | 219722_s_at | U133A |
| 1562  | Rn30024342 | 0.000577    | ENSG00000198638 | 209140_x_at | U133A |
| 1562  | Rn30024342 | 0.000577    | ENSG00000198638 | 208729_x_at | U133A |
| 1562  | Rn30024342 | 0.000577    | ENSG00000198638 | 211911_x_at | U133A |
| 1562  | Rn30024342 | 0.000577    | ENSG00000198638 | 209140_x_at | U133A |
| 1562  | Rn30024342 | 0.000577    | ENSG00000198638 | 208729_x_at | U133A |
| 1562  | Rn30024342 | 0.000577    | ENSG00000198638 | 211911_x_at | U133A |
| 1562  | Rn30024342 | 0.000577    | ENSG00000198638 | 209140_x_at | U133A |
| 1562  | Rn30024342 | 0.000577    | ENSG00000198638 | 208729_x_at | U133A |
| 1562  | Rn30024342 | 0.000577    | ENSG00000198638 | 211911_x_at | U133A |
| 1562  | Rn30024342 | 0.000577    | ENSG00000198638 | 209140_x_at | U133A |
| 1562  | Rn30024342 | 0.000577    | ENSG00000198638 | 208729_x_at | U133A |
| 1562  | Rn30024342 | 0.000577    | ENSG00000198638 | 211911_x_at | U133A |
| 1562  | Rn30024342 | 0.000577    | ENSG00000198638 | 209140_x_at | U133A |
| 1562  | Rn30024342 | 0.000577    | ENSG00000198638 | 208729_x_at | U133A |
| 1562  | Rn30024342 | 0.000577    | ENSG00000198638 | 211911_x_at | U133A |
| 1562  | Rn30024342 | 0.000577    | ENSG00000198638 | 209140_x_at | U133A |
| 1562  | Rn30024342 | 0.000577    | ENSG00000198638 | 208729_x_at | U133A |
| 1562  | Rn30024342 | 0.000577    | ENSG00000198638 | 211911_x_at | U133A |
| 1561  | Rn30005290 | 0.00077     | ENSG00000149418 | 202005_at   | U133A |
| 1561  | Rn30005290 | 0.00077     | ENSG00000149418 | 216905_s_at | U133A |
| 1561  | Rn30005290 | 0.00077     | ENSG00000149418 | 216906_at   | U133A |
| 1560  | Rn30020141 | 0.000884    | ENSG00000163218 | 220944_at   | U133A |
| 1560  | Rn30020141 | 0.000884    | ENSG00000163218 | 220944_at   | U133A |
| 1559  | Rn30026942 | 0.000906    | ENSG00000108242 | 208126_s_at | U133A |
| 1559  | Rn30026942 | 0.000906    | ENSG00000108242 | 215103_at   | U133A |
| 1559  | Rn30026942 | 0.000906    | ENSG00000108242 | 208126_s_at | U133A |
| 1559  | Rn30026942 | 0.000906    | ENSG00000108242 | 215103_at   | U133A |
| 1558  | Rn30003551 | 0.000943    | ENSG00000138031 | 209320_at   | U133A |
| 1558  | Rn30003551 | 0.000943    | ENSG00000138031 | 209321_s_at | U133A |
| 1555  | Rn30024525 | 0.00107     | ENSG00000160883 | 205936_s_at | U133A |
| 1554  | Rn30012778 | 0.00114     | ENSG00000138271 | 219936_s_at | U133A |
| 1552  | R003409_01 | 0.00115     | ENSG00000168986 | 210128_s_at | U133A |
| 1552  | R003409_01 | 0.00115     | ENSG00000168986 | 216388_s_at | U133A |
| 1553  | Rn30006161 | 0.00115     | ENSG00000125850 | 206048_at   | U133A |
| 1553  | Rn30006161 | 0.00115     | ENSG00000125850 | 211778_s_at | U133A |
| 1553  | Rn30006161 | 0.00115     | ENSG00000125850 | 206048_at   | U133A |
| 1553  | Rn30006161 | 0.00115     | ENSG00000125850 | 211778_s_at | U133A |
| 1549  | R004125_01 | 0.00123     | ENSG00000135643 | 219287_at   | U133A |
| 1547  | Rn30003465 | 0.00136     | ENSG00000186847 | 209351_at   | U133A |
| 1546  | R002400_01 | 0.00138     | ENSG00000115008 | 210118_s_at | U133A |
| 1545  | Rn30007578 | 0.0014      | ENSG00000115221 | 208083_s_at | U133A |
| 1545  | Rn30007578 | 0.0014      | ENSG00000115221 | 208084_at   | U133A |
| 1542  | Rn30016113 | 0.00144     | ENSG00000146904 | 205977_s_at | U133A |
| 1541  | Rn30005930 | 0.00147     | ENSG00000170381 | 206941_x_at | U133A |
| 1540  | Rn30018357 | 0.0015      | ENSG00000135750 | 204678_s_at | U133A |
| 1540  | Rn30018357 | 0.0015      | ENSG00000135750 | 204679_at   | U133A |
| 1537  | Rn30010401 | 0.00153     | ENSG00000095203 | 220161_s_at | U133A |

|                 |         |                 |             |       |
|-----------------|---------|-----------------|-------------|-------|
| 1537 Rn30010401 | 0.00153 | ENSG00000095203 | 220524_at   | U133A |
| 1537 Rn30010401 | 0.00153 | ENSG00000095203 | 220161_s_at | U133A |
| 1537 Rn30010401 | 0.00153 | ENSG00000095203 | 220524_at   | U133A |
| 1537 Rn30010401 | 0.00153 | ENSG00000095203 | 220161_s_at | U133A |
| 1537 Rn30010401 | 0.00153 | ENSG00000095203 | 220524_at   | U133A |
| 1538 Rn30015111 | 0.00153 | ENSG00000197971 | 207323_s_at | U133A |
| 1538 Rn30015111 | 0.00153 | ENSG00000197971 | 209072_at   | U133A |
| 1538 Rn30015111 | 0.00153 | ENSG00000197971 | 210136_at   | U133A |
| 1538 Rn30015111 | 0.00153 | ENSG00000197971 | 207323_s_at | U133A |
| 1538 Rn30015111 | 0.00153 | ENSG00000197971 | 209072_at   | U133A |
| 1538 Rn30015111 | 0.00153 | ENSG00000197971 | 210136_at   | U133A |
| 1538 Rn30015111 | 0.00153 | ENSG00000197971 | 207323_s_at | U133A |
| 1538 Rn30015111 | 0.00153 | ENSG00000197971 | 209072_at   | U133A |
| 1538 Rn30015111 | 0.00153 | ENSG00000197971 | 210136_at   | U133A |
| 1536 Rn30024313 | 0.00155 | ENSG00000112297 | 212543_at   | U133A |
| 1536 Rn30024313 | 0.00155 | ENSG00000112297 | 212543_at   | U133A |
| 1536 Rn30024313 | 0.00155 | ENSG00000112297 | 212543_at   | U133A |
| 1536 Rn30024313 | 0.00155 | ENSG00000112297 | 212543_at   | U133A |
| 1534 R001440_01 | 0.00175 | ENSG00000135333 | 206852_at   | U133A |
| 1533 Rn30016199 | 0.00177 | ENSG00000165092 | 212224_at   | U133A |
| 1532 Rn30008335 | 0.00181 | ENSG00000159166 | 216641_s_at | U133A |
| 1532 Rn30008335 | 0.00181 | ENSG00000159166 | 203287_at   | U133A |
| 1531 Rn30014357 | 0.00185 | ENSG00000119888 | 201839_s_at | U133A |
| 1530 R002984_01 | 0.0019  | ENSG00000163687 | 205554_s_at | U133A |
| 1529 Rn30002646 | 0.00194 | ENSG00000006283 | 207869_s_at | U133A |
| 1529 Rn30002646 | 0.00194 | ENSG00000006283 | 210380_s_at | U133A |
| 1529 Rn30002646 | 0.00194 | ENSG00000006283 | 211314_at   | U133A |
| 1529 Rn30002646 | 0.00194 | ENSG00000006283 | 211315_s_at | U133A |
| 1529 Rn30002646 | 0.00194 | ENSG00000006283 | 211802_x_at | U133A |
| 1529 Rn30002646 | 0.00194 | ENSG00000006283 | 207869_s_at | U133A |
| 1529 Rn30002646 | 0.00194 | ENSG00000006283 | 210380_s_at | U133A |
| 1529 Rn30002646 | 0.00194 | ENSG00000006283 | 211314_at   | U133A |
| 1529 Rn30002646 | 0.00194 | ENSG00000006283 | 211315_s_at | U133A |
| 1529 Rn30002646 | 0.00194 | ENSG00000006283 | 211802_x_at | U133A |
| 1529 Rn30002646 | 0.00194 | ENSG00000006283 | 207869_s_at | U133A |
| 1529 Rn30002646 | 0.00194 | ENSG00000006283 | 210380_s_at | U133A |
| 1529 Rn30002646 | 0.00194 | ENSG00000006283 | 211314_at   | U133A |
| 1529 Rn30002646 | 0.00194 | ENSG00000006283 | 211315_s_at | U133A |
| 1529 Rn30002646 | 0.00194 | ENSG00000006283 | 211802_x_at | U133A |
| 1529 Rn30002646 | 0.00194 | ENSG00000006283 | 207869_s_at | U133A |
| 1529 Rn30002646 | 0.00194 | ENSG00000006283 | 210380_s_at | U133A |
| 1529 Rn30002646 | 0.00194 | ENSG00000006283 | 211314_at   | U133A |
| 1529 Rn30002646 | 0.00194 | ENSG00000006283 | 211315_s_at | U133A |
| 1529 Rn30002646 | 0.00194 | ENSG00000006283 | 211802_x_at | U133A |
| 1529 Rn30002646 | 0.00194 | ENSG00000006283 | 207869_s_at | U133A |
| 1529 Rn30002646 | 0.00194 | ENSG00000006283 | 210380_s_at | U133A |
| 1529 Rn30002646 | 0.00194 | ENSG00000006283 | 211314_at   | U133A |
| 1529 Rn30002646 | 0.00194 | ENSG00000006283 | 211315_s_at | U133A |
| 1529 Rn30002646 | 0.00194 | ENSG00000006283 | 211802_x_at | U133A |
| 1529 Rn30002646 | 0.00194 | ENSG00000006283 | 207869_s_at | U133A |
| 1529 Rn30002646 | 0.00194 | ENSG00000006283 | 210380_s_at | U133A |
| 1529 Rn30002646 | 0.00194 | ENSG00000006283 | 211314_at   | U133A |
| 1529 Rn30002646 | 0.00194 | ENSG00000006283 | 211315_s_at | U133A |

|                 |         |                 |             |       |
|-----------------|---------|-----------------|-------------|-------|
| 1529 Rn30002646 | 0.00194 | ENSG00000006283 | 211802_x_at | U133A |
| 1527 Rn30002235 | 0.00197 | ENSG00000077585 | 204137_at   | U133A |
| 1527 Rn30002235 | 0.00197 | ENSG00000077585 | 204137_at   | U133A |
| 1525 Rn30022462 | 0.00206 | ENSG00000196805 | 208539_x_at | U133A |
| 1525 Rn30022462 | 0.00206 | ENSG00000196805 | 208539_x_at | U133A |
| 1525 Rn30022462 | 0.00206 | ENSG00000196805 | 208539_x_at | U133A |
| 1525 Rn30022462 | 0.00206 | ENSG00000196805 | 208539_x_at | U133A |
| 1524 Rn30021771 | 0.00206 | ENSG00000181652 | 205262_at   | U133A |
| 1524 Rn30021771 | 0.00206 | ENSG00000181652 | 210036_s_at | U133A |
| 1522 Rn30007148 | 0.00208 | ENSG00000134602 | 218499_at   | U133A |
| 1522 Rn30007148 | 0.00208 | ENSG00000134602 | 218499_at   | U133A |
| 1522 Rn30007148 | 0.00208 | ENSG00000134602 | 218499_at   | U133A |
| 1520 Rn30012181 | 0.00209 | ENSG00000116035 | 220443_s_at | U133A |
| 1519 Rn30022963 | 0.00212 | ENSG00000166016 | 213497_at   | U133A |
| 1518 Rn30018529 | 0.00213 | ENSG00000062038 | 203256_at   | U133A |
| 1518 Rn30018529 | 0.00213 | ENSG00000062038 | 203256_at   | U133A |
| 1517 Rn30012707 | 0.00216 | ENSG00000172831 | 209667_at   | U133A |
| 1517 Rn30012707 | 0.00216 | ENSG00000172831 | 209668_x_at | U133A |
| 1517 Rn30012707 | 0.00216 | ENSG00000172831 | 213509_x_at | U133A |
| 1516 Rn30025669 | 0.00217 | ENSG00000171219 | 204936_at   | U133A |
| 1516 Rn30025669 | 0.00217 | ENSG00000171219 | 204936_at   | U133A |
| 1514 Rn30014278 | 0.00219 | ENSG00000174292 | 205793_x_at | U133A |
| 1514 Rn30014278 | 0.00219 | ENSG00000174292 | 217149_x_at | U133A |
| 1514 Rn30014278 | 0.00219 | ENSG00000174292 | 205793_x_at | U133A |
| 1514 Rn30014278 | 0.00219 | ENSG00000174292 | 217149_x_at | U133A |
| 1515 Rn30017308 | 0.00219 | ENSG00000187796 | 220162_s_at | U133A |
| 1515 Rn30017308 | 0.00219 | ENSG00000187796 | 220162_s_at | U133A |
| 1513 Rn30019070 | 0.00221 | ENSG00000164050 | 215668_s_at | U133A |
| 1513 Rn30019070 | 0.00221 | ENSG00000164050 | 215807_s_at | U133A |
| 1513 Rn30019070 | 0.00221 | ENSG00000164050 | 215668_s_at | U133A |
| 1513 Rn30019070 | 0.00221 | ENSG00000164050 | 215807_s_at | U133A |
| 1513 Rn30019070 | 0.00221 | ENSG00000164050 | 215668_s_at | U133A |
| 1513 Rn30019070 | 0.00221 | ENSG00000164050 | 215807_s_at | U133A |
| 1510 R001461_01 | 0.0023  | ENSG00000100985 | 203936_s_at | U133A |
| 1509 R003824_01 | 0.00236 | ENSG00000162892 | 206569_at   | U133A |
| 1509 R003824_01 | 0.00236 | ENSG00000162892 | 206569_at   | U133A |
| 1507 R004253_01 | 0.0024  | ENSG00000069011 | 208502_s_at | U133A |
| 1507 R004253_01 | 0.0024  | ENSG00000069011 | 209587_at   | U133A |
| 1507 R004253_01 | 0.0024  | ENSG00000069011 | 208502_s_at | U133A |
| 1507 R004253_01 | 0.0024  | ENSG00000069011 | 209587_at   | U133A |
| 1505 Rn30011805 | 0.00247 | ENSG00000166145 | 202826_at   | U133A |
| 1503 Rn30013066 | 0.00251 | ENSG00000149527 | 206080_at   | U133A |
| 1503 Rn30013066 | 0.00251 | ENSG00000149527 | 206080_at   | U133A |
| 1503 Rn30013066 | 0.00251 | ENSG00000149527 | 206080_at   | U133A |
| 1502 Rn30012050 | 0.00258 | ENSG00000054179 | 207372_s_at | U133A |
| 1502 Rn30012050 | 0.00258 | ENSG00000054179 | 207372_s_at | U133A |
| 1499 Rn30014690 | 0.0026  | ENSG00000149573 | 203779_s_at | U133A |
| 1499 Rn30014690 | 0.0026  | ENSG00000149573 | 203780_at   | U133A |
| 1500 Rn30005157 | 0.0026  | ENSG00000136695 | 222223_s_at | U133A |
| 1500 Rn30005157 | 0.0026  | ENSG00000136695 | 222223_s_at | U133A |
| 1498 Rn30011092 | 0.00262 | ENSG00000099139 | 205559_s_at | U133A |
| 1498 Rn30011092 | 0.00262 | ENSG00000099139 | 205560_at   | U133A |
| 1498 Rn30011092 | 0.00262 | ENSG00000099139 | 213652_at   | U133A |

|                 |         |                 |             |       |
|-----------------|---------|-----------------|-------------|-------|
| 1497 Rn30005274 | 0.00266 | ENSG00000196781 | 203220_s_at | U133A |
| 1497 Rn30005274 | 0.00266 | ENSG00000196781 | 203221_at   | U133A |
| 1497 Rn30005274 | 0.00266 | ENSG00000196781 | 203222_s_at | U133A |
| 1497 Rn30005274 | 0.00266 | ENSG00000196781 | 215802_at   | U133A |
| 1497 Rn30005274 | 0.00266 | ENSG00000196781 | 203220_s_at | U133A |
| 1497 Rn30005274 | 0.00266 | ENSG00000196781 | 203221_at   | U133A |
| 1497 Rn30005274 | 0.00266 | ENSG00000196781 | 203222_s_at | U133A |
| 1497 Rn30005274 | 0.00266 | ENSG00000196781 | 215802_at   | U133A |
| 1493 Rn30019047 | 0.00276 | ENSG00000172818 | 206604_at   | U133A |
| 1492 Rn30026570 | 0.00281 | ENSG00000176153 | 202831_at   | U133A |
| 1492 Rn30026570 | 0.00281 | ENSG00000176153 | 202831_at   | U133A |
| 1490 Rn30006303 | 0.00288 | ENSG00000141738 | 210761_s_at | U133A |
| 1490 Rn30006303 | 0.00288 | ENSG00000141738 | 210761_s_at | U133A |
| 1488 R000142_01 | 0.00296 | ENSG00000039068 | 201130_s_at | U133A |
| 1488 R000142_01 | 0.00296 | ENSG00000039068 | 201131_s_at | U133A |
| 1488 R000142_01 | 0.00296 | ENSG00000039068 | 208834_x_at | U133A |
| 1488 R000142_01 | 0.00296 | ENSG00000039068 | 201130_s_at | U133A |
| 1488 R000142_01 | 0.00296 | ENSG00000039068 | 201131_s_at | U133A |
| 1488 R000142_01 | 0.00296 | ENSG00000039068 | 208834_x_at | U133A |
| 1485 Rn30009100 | 0.00304 | ENSG00000140563 | 220603_s_at | U133A |
| 1485 Rn30009100 | 0.00304 | ENSG00000140563 | 220603_s_at | U133A |
| 1485 Rn30009100 | 0.00304 | ENSG00000140563 | 220603_s_at | U133A |
| 1485 Rn30009100 | 0.00304 | ENSG00000140563 | 220603_s_at | U133A |
| 1485 Rn30009100 | 0.00304 | ENSG00000140563 | 220603_s_at | U133A |
| 1485 Rn30009100 | 0.00304 | ENSG00000140563 | 220603_s_at | U133A |
| 1485 Rn30009100 | 0.00304 | ENSG00000140563 | 220603_s_at | U133A |
| 1484 R001389_01 | 0.00305 | ENSG00000076944 | 209367_at   | U133A |
| 1484 R001389_01 | 0.00305 | ENSG00000076944 | 209367_at   | U133A |
| 1483 R003349_01 | 0.00305 | ENSG00000124466 | 204952_at   | U133A |
| 1482 Rn30019427 | 0.00307 | ENSG00000105699 | 208190_s_at | U133A |
| 1482 Rn30019427 | 0.00307 | ENSG00000105699 | 208190_s_at | U133A |
| 1482 Rn30019427 | 0.00307 | ENSG00000105699 | 208190_s_at | U133A |
| 1481 Rn30022260 | 0.0032  | ENSG00000121552 | 204971_at   | U133A |
| 1481 Rn30022260 | 0.0032  | ENSG00000121552 | 204971_at   | U133A |
| 1476 Rn30009546 | 0.00333 | ENSG00000157168 | 206237_s_at | U133A |
| 1476 Rn30009546 | 0.00333 | ENSG00000157168 | 206343_s_at | U133A |
| 1476 Rn30009546 | 0.00333 | ENSG00000157168 | 208230_s_at | U133A |
| 1476 Rn30009546 | 0.00333 | ENSG00000157168 | 208231_at   | U133A |
| 1476 Rn30009546 | 0.00333 | ENSG00000157168 | 208241_at   | U133A |
| 1476 Rn30009546 | 0.00333 | ENSG00000157168 | 206237_s_at | U133A |
| 1476 Rn30009546 | 0.00333 | ENSG00000157168 | 206343_s_at | U133A |
| 1476 Rn30009546 | 0.00333 | ENSG00000157168 | 208230_s_at | U133A |
| 1476 Rn30009546 | 0.00333 | ENSG00000157168 | 208231_at   | U133A |
| 1476 Rn30009546 | 0.00333 | ENSG00000157168 | 208241_at   | U133A |
| 1476 Rn30009546 | 0.00333 | ENSG00000157168 | 206237_s_at | U133A |
| 1476 Rn30009546 | 0.00333 | ENSG00000157168 | 206343_s_at | U133A |
| 1476 Rn30009546 | 0.00333 | ENSG00000157168 | 208230_s_at | U133A |
| 1476 Rn30009546 | 0.00333 | ENSG00000157168 | 208231_at   | U133A |
| 1476 Rn30009546 | 0.00333 | ENSG00000157168 | 208241_at   | U133A |
| 1476 Rn30009546 | 0.00333 | ENSG00000157168 | 206237_s_at | U133A |
| 1476 Rn30009546 | 0.00333 | ENSG00000157168 | 206343_s_at | U133A |
| 1476 Rn30009546 | 0.00333 | ENSG00000157168 | 208230_s_at | U133A |
| 1476 Rn30009546 | 0.00333 | ENSG00000157168 | 208231_at   | U133A |
| 1476 Rn30009546 | 0.00333 | ENSG00000157168 | 208241_at   | U133A |

|                 |         |                 |             |       |
|-----------------|---------|-----------------|-------------|-------|
| 1476 Rn30009546 | 0.00333 | ENSG00000157168 | 206237_s_at | U133A |
| 1476 Rn30009546 | 0.00333 | ENSG00000157168 | 206343_s_at | U133A |
| 1476 Rn30009546 | 0.00333 | ENSG00000157168 | 208230_s_at | U133A |
| 1476 Rn30009546 | 0.00333 | ENSG00000157168 | 208231_at   | U133A |
| 1476 Rn30009546 | 0.00333 | ENSG00000157168 | 208241_at   | U133A |
| 1476 Rn30009546 | 0.00333 | ENSG00000157168 | 206237_s_at | U133A |
| 1476 Rn30009546 | 0.00333 | ENSG00000157168 | 206343_s_at | U133A |
| 1476 Rn30009546 | 0.00333 | ENSG00000157168 | 208230_s_at | U133A |
| 1476 Rn30009546 | 0.00333 | ENSG00000157168 | 208231_at   | U133A |
| 1476 Rn30009546 | 0.00333 | ENSG00000157168 | 208241_at   | U133A |
| 1476 Rn30009546 | 0.00333 | ENSG00000157168 | 206237_s_at | U133A |
| 1476 Rn30009546 | 0.00333 | ENSG00000157168 | 206343_s_at | U133A |
| 1476 Rn30009546 | 0.00333 | ENSG00000157168 | 208230_s_at | U133A |
| 1476 Rn30009546 | 0.00333 | ENSG00000157168 | 208231_at   | U133A |
| 1476 Rn30009546 | 0.00333 | ENSG00000157168 | 208241_at   | U133A |
| 1476 Rn30009546 | 0.00333 | ENSG00000157168 | 206237_s_at | U133A |
| 1476 Rn30009546 | 0.00333 | ENSG00000157168 | 206343_s_at | U133A |
| 1476 Rn30009546 | 0.00333 | ENSG00000157168 | 208230_s_at | U133A |
| 1476 Rn30009546 | 0.00333 | ENSG00000157168 | 208231_at   | U133A |
| 1476 Rn30009546 | 0.00333 | ENSG00000157168 | 208241_at   | U133A |
| 1476 Rn30009546 | 0.00333 | ENSG00000157168 | 206237_s_at | U133A |
| 1476 Rn30009546 | 0.00333 | ENSG00000157168 | 206343_s_at | U133A |
| 1476 Rn30009546 | 0.00333 | ENSG00000157168 | 208230_s_at | U133A |
| 1476 Rn30009546 | 0.00333 | ENSG00000157168 | 208231_at   | U133A |
| 1476 Rn30009546 | 0.00333 | ENSG00000157168 | 208241_at   | U133A |
| 1477 Rn30009708 | 0.00333 | ENSG00000106689 | 206140_at   | U133A |
| 1477 Rn30009708 | 0.00333 | ENSG00000106689 | 211219_s_at | U133A |
| 1475 Rn30018739 | 0.00348 | ENSG00000107957 | 207661_s_at | U133A |
| 1475 Rn30018739 | 0.00348 | ENSG00000107957 | 213252_at   | U133A |
| 1475 Rn30018739 | 0.00348 | ENSG00000107957 | 207661_s_at | U133A |
| 1475 Rn30018739 | 0.00348 | ENSG00000107957 | 213252_at   | U133A |
| 1474 Rn30001854 | 0.0035  | ENSG00000142188 | 219600_s_at | U133A |
| 1470 R004748_01 | 0.00382 | ENSG00000105550 | 221433_at   | U133A |
| 1469 Rn30007885 | 0.00386 | ENSG00000175793 | 33322_i_at  | U133A |
| 1469 Rn30007885 | 0.00386 | ENSG00000175793 | 33323_r_at  | U133A |
| 1469 Rn30007885 | 0.00386 | ENSG00000175793 | 209260_at   | U133A |
| 1467 Rn30018862 | 0.00386 | ENSG00000134215 | 218806_s_at | U133A |
| 1467 Rn30018862 | 0.00386 | ENSG00000134215 | 218807_at   | U133A |
| 1467 Rn30018862 | 0.00386 | ENSG00000134215 | 218806_s_at | U133A |
| 1467 Rn30018862 | 0.00386 | ENSG00000134215 | 218807_at   | U133A |
| 1468 Rn30018895 | 0.00386 | ENSG00000126460 | 205617_at   | U133A |
| 1466 Rn30021969 | 0.00396 | ENSG00000132698 | 218186_at   | U133A |
| 1466 Rn30021969 | 0.00396 | ENSG00000132698 | 218186_at   | U133A |
| 1465 Rn30012974 | 0.00406 | ENSG00000167207 | 220066_at   | U133A |
| 1462 R001475_01 | 0.00414 | ENSG00000163734 | 207850_at   | U133A |
| 1461 Rn30004561 | 0.00422 | ENSG00000117595 | 202597_at   | U133A |
| 1458 Rn30017442 | 0.00437 | ENSG00000103089 | 219429_at   | U133A |
| 1458 Rn30017442 | 0.00437 | ENSG00000103089 | 219429_at   | U133A |
| 1457 Rn30007032 | 0.0044  | ENSG00000184292 | 202285_s_at | U133A |
| 1457 Rn30007032 | 0.0044  | ENSG00000184292 | 202286_s_at | U133A |
| 1457 Rn30007032 | 0.0044  | ENSG00000184292 | 202287_s_at | U133A |
| 1454 Rn30013895 | 0.00457 | ENSG00000184363 | 209872_s_at | U133A |
| 1454 Rn30013895 | 0.00457 | ENSG00000184363 | 209873_s_at | U133A |

|                 |         |                 |             |       |
|-----------------|---------|-----------------|-------------|-------|
| 1453 Rn30008498 | 0.00467 | ENSG00000005238 | 207765_s_at | U133A |
| 1453 Rn30008498 | 0.00467 | ENSG00000005238 | 211433_x_at | U133A |
| 1453 Rn30008498 | 0.00467 | ENSG00000005238 | 207765_s_at | U133A |
| 1453 Rn30008498 | 0.00467 | ENSG00000005238 | 211433_x_at | U133A |
| 1453 Rn30008498 | 0.00467 | ENSG00000005238 | 207765_s_at | U133A |
| 1453 Rn30008498 | 0.00467 | ENSG00000005238 | 211433_x_at | U133A |
| 1452 Rn30024246 | 0.00468 | ENSG00000073792 | 215163_at   | U133A |
| 1452 Rn30024246 | 0.00468 | ENSG00000073792 | 218847_at   | U133A |
| 1452 Rn30024246 | 0.00468 | ENSG00000073792 | 215163_at   | U133A |
| 1452 Rn30024246 | 0.00468 | ENSG00000073792 | 218847_at   | U133A |
| 1452 Rn30024246 | 0.00468 | ENSG00000073792 | 215163_at   | U133A |
| 1452 Rn30024246 | 0.00468 | ENSG00000073792 | 218847_at   | U133A |
| 1452 Rn30024246 | 0.00468 | ENSG00000073792 | 215163_at   | U133A |
| 1452 Rn30024246 | 0.00468 | ENSG00000073792 | 218847_at   | U133A |
| 1449 Rn30024035 | 0.00483 | ENSG00000139725 | 219045_at   | U133A |
| 1447 Rn30018376 | 0.00485 | ENSG00000066135 | 203204_s_at | U133A |
| 1447 Rn30018376 | 0.00485 | ENSG00000066135 | 203205_at   | U133A |
| 1446 Rn30004629 | 0.00487 | ENSG00000138036 | 203762_s_at | U133A |
| 1446 Rn30004629 | 0.00487 | ENSG00000138036 | 203763_at   | U133A |
| 1446 Rn30004629 | 0.00487 | ENSG00000138036 | 203762_s_at | U133A |
| 1446 Rn30004629 | 0.00487 | ENSG00000138036 | 203763_at   | U133A |
| 1446 Rn30004629 | 0.00487 | ENSG00000138036 | 203762_s_at | U133A |
| 1446 Rn30004629 | 0.00487 | ENSG00000138036 | 203763_at   | U133A |
| 1445 Rn30019896 | 0.00493 | ENSG00000065534 | 202555_s_at | U133A |
| 1445 Rn30019896 | 0.00493 | ENSG00000065534 | 202555_s_at | U133A |
| 1445 Rn30019896 | 0.00493 | ENSG00000065534 | 202555_s_at | U133A |
| 1445 Rn30019896 | 0.00493 | ENSG00000065534 | 202555_s_at | U133A |
| 1445 Rn30019896 | 0.00493 | ENSG00000065534 | 202555_s_at | U133A |
| 1445 Rn30019896 | 0.00493 | ENSG00000065534 | 202555_s_at | U133A |
| 1445 Rn30019896 | 0.00493 | ENSG00000065534 | 202555_s_at | U133A |
| 1445 Rn30019896 | 0.00493 | ENSG00000065534 | 202555_s_at | U133A |
| 1444 Rn30019166 | 0.00494 | ENSG00000173338 | 220412_x_at | U133A |
| 1444 Rn30019166 | 0.00494 | ENSG00000173338 | 220412_x_at | U133A |
| 1443 Rn30007196 | 0.005   | ENSG00000137843 | 219461_at   | U133A |
| 1442 Rn30023302 | 0.00503 | ENSG00000169247 | 219710_at   | U133A |
| 1442 Rn30023302 | 0.00503 | ENSG00000169247 | 219710_at   | U133A |
| 1439 Rn30015388 | 0.00522 | ENSG00000110066 | 218242_s_at | U133A |
| 1438 Rn30001010 | 0.00527 | ENSG00000135127 | 215015_at   | U133A |
| 1438 Rn30001010 | 0.00527 | ENSG00000135127 | 215015_at   | U133A |
| 1437 Rn30013300 | 0.0053  | ENSG00000080298 | 207234_at   | U133A |
| 1437 Rn30013300 | 0.0053  | ENSG00000080298 | 217671_at   | U133A |
| 1437 Rn30013300 | 0.0053  | ENSG00000080298 | 207234_at   | U133A |
| 1437 Rn30013300 | 0.0053  | ENSG00000080298 | 217671_at   | U133A |
| 1437 Rn30013300 | 0.0053  | ENSG00000080298 | 207234_at   | U133A |
| 1437 Rn30013300 | 0.0053  | ENSG00000080298 | 217671_at   | U133A |
| 1436 Rn30014303 | 0.00533 | ENSG00000152894 | 203038_at   | U133A |
| 1436 Rn30014303 | 0.00533 | ENSG00000152894 | 203038_at   | U133A |
| 1435 R000695_01 | 0.00537 | ENSG00000140600 | 205637_s_at | U133A |
| 1435 R000695_01 | 0.00537 | ENSG00000140600 | 205637_s_at | U133A |
| 1433 Rn30022556 | 0.00546 | ENSG00000136155 | 206884_s_at | U133A |
| 1433 Rn30022556 | 0.00546 | ENSG00000136155 | 206884_s_at | U133A |
| 1433 Rn30022556 | 0.00546 | ENSG00000136155 | 206884_s_at | U133A |
| 1431 Rn30010640 | 0.00561 | ENSG00000143546 | 202917_s_at | U133A |
| 1429 Rn30017907 | 0.00563 | ENSG00000197417 | 219712_s_at | U133A |

|      |            |         |                 |             |       |
|------|------------|---------|-----------------|-------------|-------|
| 1429 | Rn30017907 | 0.00563 | ENSG00000197417 | 219713_at   | U133A |
| 1428 | Rn30004369 | 0.00568 | ENSG00000066382 | 205413_at   | U133A |
| 1428 | Rn30004369 | 0.00568 | ENSG00000066382 | 215692_s_at | U133A |
| 1428 | Rn30004369 | 0.00568 | ENSG00000066382 | 205413_at   | U133A |
| 1428 | Rn30004369 | 0.00568 | ENSG00000066382 | 215692_s_at | U133A |
| 1428 | Rn30004369 | 0.00568 | ENSG00000066382 | 205413_at   | U133A |
| 1428 | Rn30004369 | 0.00568 | ENSG00000066382 | 215692_s_at | U133A |
| 1428 | Rn30004369 | 0.00568 | ENSG00000066382 | 205413_at   | U133A |
| 1428 | Rn30004369 | 0.00568 | ENSG00000066382 | 215692_s_at | U133A |
| 1424 | Rn30006752 | 0.0061  | ENSG00000179148 | 207708_at   | U133A |
| 1424 | Rn30006752 | 0.0061  | ENSG00000179148 | 222383_s_at | U133A |
| 1423 | Rn30021434 | 0.00615 | ENSG00000128284 | 221087_s_at | U133A |
| 1423 | Rn30021434 | 0.00615 | ENSG00000128284 | 221087_s_at | U133A |
| 1423 | Rn30021434 | 0.00615 | ENSG00000128284 | 221087_s_at | U133A |
| 1423 | Rn30021434 | 0.00615 | ENSG00000128284 | 221087_s_at | U133A |
| 1421 | R004637_01 | 0.00631 | ENSG00000137156 | 219916_s_at | U133A |
| 1421 | R004637_01 | 0.00631 | ENSG00000137156 | 219916_s_at | U133A |
| 1421 | R004637_01 | 0.00631 | ENSG00000137156 | 219916_s_at | U133A |
| 1421 | R004637_01 | 0.00631 | ENSG00000137156 | 219916_s_at | U133A |
| 1420 | R005084_01 | 0.00636 | ENSG00000112378 | 217744_s_at | U133A |
| 1420 | R005084_01 | 0.00636 | ENSG00000112378 | 217744_s_at | U133A |
| 1419 | Rn30008083 | 0.0064  | ENSG00000106789 | 205538_at   | U133A |
| 1419 | Rn30008083 | 0.0064  | ENSG00000106789 | 205538_at   | U133A |
| 1418 | Rn30011932 | 0.00642 | ENSG00000144749 | 211596_s_at | U133A |
| 1417 | Rn30000799 | 0.00652 | ENSG00000139508 | 214719_at   | U133A |
| 1415 | Rn30013917 | 0.00685 | ENSG00000169583 | 219529_at   | U133A |
| 1414 | Rn30015221 | 0.00694 | ENSG00000134757 | 205595_at   | U133A |
| 1413 | Rn30008783 | 0.00695 | ENSG00000143631 | 215704_at   | U133A |
| 1413 | Rn30008783 | 0.00695 | ENSG00000143631 | 215704_at   | U133A |
| 1413 | Rn30008783 | 0.00695 | ENSG00000143631 | 215704_at   | U133A |
| 1413 | Rn30008783 | 0.00695 | ENSG00000143631 | 215704_at   | U133A |
| 1413 | Rn30008783 | 0.00695 | ENSG00000143631 | 215704_at   | U133A |
| 1413 | Rn30008783 | 0.00695 | ENSG00000143631 | 215704_at   | U133A |
| 1411 | R002544_01 | 0.00709 | ENSG00000158769 | 221664_s_at | U133A |
| 1411 | R002544_01 | 0.00709 | ENSG00000158769 | 221664_s_at | U133A |
| 1411 | R002544_01 | 0.00709 | ENSG00000158769 | 221664_s_at | U133A |
| 1410 | Rn30023521 | 0.00736 | ENSG00000176788 | 202391_at   | U133A |
| 1409 | Rn30019107 | 0.00748 | ENSG00000177380 | 213368_x_at | U133A |
| 1409 | Rn30019107 | 0.00748 | ENSG00000177380 | 215280_s_at | U133A |
| 1409 | Rn30019107 | 0.00748 | ENSG00000177380 | 213368_x_at | U133A |
| 1409 | Rn30019107 | 0.00748 | ENSG00000177380 | 215280_s_at | U133A |
| 1409 | Rn30019107 | 0.00748 | ENSG00000177380 | 213368_x_at | U133A |
| 1409 | Rn30019107 | 0.00748 | ENSG00000177380 | 215280_s_at | U133A |
| 1409 | Rn30019107 | 0.00748 | ENSG00000177380 | 213368_x_at | U133A |
| 1409 | Rn30019107 | 0.00748 | ENSG00000177380 | 215280_s_at | U133A |
| 1408 | Rn30001340 | 0.00775 | ENSG00000189143 | 201428_at   | U133A |
| 1408 | Rn30001340 | 0.00775 | ENSG00000189143 | 201428_at   | U133A |
| 1406 | Rn30000172 | 0.00819 | ENSG00000108932 | 207038_at   | U133A |
| 1406 | Rn30000172 | 0.00819 | ENSG00000108932 | 207038_at   | U133A |
| 1405 | Rn30008664 | 0.00823 | ENSG00000170370 | 221950_at   | U133A |
| 1404 | Rn30001289 | 0.00832 | ENSG00000160999 | 205367_at   | U133A |
| 1403 | Rn30013645 | 0.00842 | ENSG00000139163 | 219017_at   | U133A |
| 1403 | Rn30013645 | 0.00842 | ENSG00000139163 | 222262_s_at | U133A |
| 1403 | Rn30013645 | 0.00842 | ENSG00000139163 | 219017_at   | U133A |

|      |            |         |                 |             |       |
|------|------------|---------|-----------------|-------------|-------|
| 1403 | Rn30013645 | 0.00842 | ENSG00000139163 | 222262_s_at | U133A |
| 1402 | Rn30006564 | 0.00842 | ENSG00000006432 | 214969_at   | U133A |
| 1401 | Rn30011615 | 0.0085  | ENSG00000186439 | 222287_at   | U133A |
| 1401 | Rn30011615 | 0.0085  | ENSG00000186439 | 222287_at   | U133A |
| 1401 | Rn30011615 | 0.0085  | ENSG00000186439 | 222287_at   | U133A |
| 1401 | Rn30011615 | 0.0085  | ENSG00000186439 | 222287_at   | U133A |
| 1400 | Rn30013428 | 0.00853 | ENSG00000153904 | 209094_at   | U133A |
| 1400 | Rn30013428 | 0.00853 | ENSG00000153904 | 209094_at   | U133A |
| 1399 | Rn30011243 | 0.00854 | ENSG00000151914 | 204455_at   | U133A |
| 1399 | Rn30011243 | 0.00854 | ENSG00000151914 | 212253_x_at | U133A |
| 1399 | Rn30011243 | 0.00854 | ENSG00000151914 | 212254_s_at | U133A |
| 1399 | Rn30011243 | 0.00854 | ENSG00000151914 | 215016_x_at | U133A |
| 1399 | Rn30011243 | 0.00854 | ENSG00000151914 | 215810_x_at | U133A |
| 1399 | Rn30011243 | 0.00854 | ENSG00000151914 | 216918_s_at | U133A |
| 1399 | Rn30011243 | 0.00854 | ENSG00000151914 | 220154_at   | U133A |
| 1399 | Rn30011243 | 0.00854 | ENSG00000151914 | 212253_x_at | U133A |
| 1399 | Rn30011243 | 0.00854 | ENSG00000151914 | 212254_s_at | U133A |
| 1399 | Rn30011243 | 0.00854 | ENSG00000151914 | 215016_x_at | U133A |
| 1399 | Rn30011243 | 0.00854 | ENSG00000151914 | 204455_at   | U133A |
| 1399 | Rn30011243 | 0.00854 | ENSG00000151914 | 212253_x_at | U133A |
| 1399 | Rn30011243 | 0.00854 | ENSG00000151914 | 212254_s_at | U133A |
| 1399 | Rn30011243 | 0.00854 | ENSG00000151914 | 215016_x_at | U133A |
| 1399 | Rn30011243 | 0.00854 | ENSG00000151914 | 216918_s_at | U133A |
| 1399 | Rn30011243 | 0.00854 | ENSG00000151914 | 220154_at   | U133A |
| 1399 | Rn30011243 | 0.00854 | ENSG00000151914 | 204455_at   | U133A |
| 1399 | Rn30011243 | 0.00854 | ENSG00000151914 | 215810_x_at | U133A |
| 1399 | Rn30011243 | 0.00854 | ENSG00000151914 | 216918_s_at | U133A |
| 1399 | Rn30011243 | 0.00854 | ENSG00000151914 | 204455_at   | U133A |
| 1399 | Rn30011243 | 0.00854 | ENSG00000151914 | 216918_s_at | U133A |
| 1395 | Rn30016464 | 0.00984 | ENSG00000151651 | 205179_s_at | U133A |
| 1395 | Rn30016464 | 0.00984 | ENSG00000151651 | 205180_s_at | U133A |
| 1394 | Rn30014836 | 0.00997 | ENSG00000118729 | 207317_s_at | U133A |
| 1393 | Rn30013833 | 0.00998 | ENSG00000184323 | 212203_x_at | U133A |
| 1389 | Rn30002325 | 0.0105  | ENSG00000057149 | 209719_x_at | U133A |
| 1389 | Rn30002325 | 0.0105  | ENSG00000057149 | 209720_s_at | U133A |
| 1389 | Rn30002325 | 0.0105  | ENSG00000057149 | 210413_x_at | U133A |
| 1389 | Rn30002325 | 0.0105  | ENSG00000057149 | 211906_s_at | U133A |
| 1389 | Rn30002325 | 0.0105  | ENSG00000057149 | 210413_x_at | U133A |
| 1389 | Rn30002325 | 0.0105  | ENSG00000057149 | 211906_s_at | U133A |
| 1389 | Rn30002325 | 0.0105  | ENSG00000057149 | 209719_x_at | U133A |
| 1389 | Rn30002325 | 0.0105  | ENSG00000057149 | 209720_s_at | U133A |
| 1389 | Rn30002325 | 0.0105  | ENSG00000057149 | 210413_x_at | U133A |
| 1389 | Rn30002325 | 0.0105  | ENSG00000057149 | 211906_s_at | U133A |
| 1389 | Rn30002325 | 0.0105  | ENSG00000057149 | 209719_x_at | U133A |
| 1389 | Rn30002325 | 0.0105  | ENSG00000057149 | 209720_s_at | U133A |
| 1389 | Rn30002325 | 0.0105  | ENSG00000057149 | 210413_x_at | U133A |
| 1389 | Rn30002325 | 0.0105  | ENSG00000057149 | 211906_s_at | U133A |
| 1389 | Rn30002325 | 0.0105  | ENSG00000057149 | 209719_x_at | U133A |
| 1389 | Rn30002325 | 0.0105  | ENSG00000057149 | 209720_s_at | U133A |
| 1389 | Rn30002325 | 0.0105  | ENSG00000057149 | 210413_x_at | U133A |
| 1389 | Rn30002325 | 0.0105  | ENSG00000057149 | 211906_s_at | U133A |
| 1389 | Rn30002325 | 0.0105  | ENSG00000057149 | 209719_x_at | U133A |
| 1389 | Rn30002325 | 0.0105  | ENSG00000057149 | 209720_s_at | U133A |
| 1389 | Rn30002325 | 0.0105  | ENSG00000057149 | 210413_x_at | U133A |
| 1389 | Rn30002325 | 0.0105  | ENSG00000057149 | 209719_x_at | U133A |





|                 |                        |             |       |
|-----------------|------------------------|-------------|-------|
| 1381 Rn30001271 | 0.0119 ENSG00000106351 | 222126_at   | U133A |
| 1381 Rn30001271 | 0.0119 ENSG00000106351 | 206821_x_at | U133A |
| 1381 Rn30001271 | 0.0119 ENSG00000106351 | 222126_at   | U133A |
| 1383 R000644_01 | 0.0119 ENSG00000108688 | 208075_s_at | U133A |
| 1380 R001154_01 | 0.0123 ENSG00000123892 | 219412_at   | U133A |
| 1379 Rn30008385 | 0.0125 ENSG00000163209 | 218990_s_at | U133A |
| 1379 Rn30008385 | 0.0125 ENSG00000163209 | 218990_s_at | U133A |
| 1378 Rn30004794 | 0.0127 ENSG00000163032 | 203797_at   | U133A |
| 1378 Rn30004794 | 0.0127 ENSG00000163032 | 203798_s_at | U133A |
| 1377 Rn30010995 | 0.013 ENSG00000080503  | 212257_s_at | U133A |
| 1377 Rn30010995 | 0.013 ENSG00000080503  | 206542_s_at | U133A |
| 1377 Rn30010995 | 0.013 ENSG00000080503  | 206544_x_at | U133A |
| 1377 Rn30010995 | 0.013 ENSG00000080503  | 212257_s_at | U133A |
| 1377 Rn30010995 | 0.013 ENSG00000080503  | 206542_s_at | U133A |
| 1377 Rn30010995 | 0.013 ENSG00000080503  | 206544_x_at | U133A |
| 1377 Rn30010995 | 0.013 ENSG00000080503  | 212257_s_at | U133A |
| 1377 Rn30010995 | 0.013 ENSG00000080503  | 206542_s_at | U133A |
| 1377 Rn30010995 | 0.013 ENSG00000080503  | 206544_x_at | U133A |
| 1377 Rn30010995 | 0.013 ENSG00000080503  | 212257_s_at | U133A |
| 1377 Rn30010995 | 0.013 ENSG00000080503  | 206542_s_at | U133A |
| 1377 Rn30010995 | 0.013 ENSG00000080503  | 206544_x_at | U133A |
| 1377 Rn30010995 | 0.013 ENSG00000080503  | 212257_s_at | U133A |
| 1377 Rn30010995 | 0.013 ENSG00000080503  | 206542_s_at | U133A |
| 1377 Rn30010995 | 0.013 ENSG00000080503  | 206544_x_at | U133A |
| 1377 Rn30010995 | 0.013 ENSG00000080503  | 212257_s_at | U133A |
| 1377 Rn30010995 | 0.013 ENSG00000080503  | 206542_s_at | U133A |
| 1377 Rn30010995 | 0.013 ENSG00000080503  | 206544_x_at | U133A |
| 1377 Rn30010995 | 0.013 ENSG00000080503  | 212257_s_at | U133A |
| 1377 Rn30010995 | 0.013 ENSG00000080503  | 206542_s_at | U133A |
| 1377 Rn30010995 | 0.013 ENSG00000080503  | 206544_x_at | U133A |
| 1377 Rn30010995 | 0.013 ENSG00000080503  | 212257_s_at | U133A |
| 1377 Rn30010995 | 0.013 ENSG00000080503  | 206542_s_at | U133A |
| 1377 Rn30010995 | 0.013 ENSG00000080503  | 206544_x_at | U133A |
| 1377 Rn30010995 | 0.013 ENSG00000080503  | 212257_s_at | U133A |
| 1377 Rn30010995 | 0.013 ENSG00000080503  | 206542_s_at | U133A |
| 1377 Rn30010995 | 0.013 ENSG00000080503  | 206544_x_at | U133A |
| 1377 Rn30010995 | 0.013 ENSG00000080503  | 212257_s_at | U133A |
| 1377 Rn30010995 | 0.013 ENSG00000080503  | 206542_s_at | U133A |
| 1377 Rn30010995 | 0.013 ENSG00000080503  | 206544_x_at | U133A |
| 1375 Rn30017146 | 0.0138 ENSG00000154889 | 213727_x_at | U133A |
| 1375 Rn30017146 | 0.0138 ENSG00000154889 | 209858_x_at | U133A |
| 1375 Rn30017146 | 0.0138 ENSG00000154889 | 206764_x_at | U133A |
| 1375 Rn30017146 | 0.0138 ENSG00000154889 | 213727_x_at | U133A |
| 1375 Rn30017146 | 0.0138 ENSG00000154889 | 209858_x_at | U133A |
| 1375 Rn30017146 | 0.0138 ENSG00000154889 | 206764_x_at | U133A |
| 1375 Rn30017146 | 0.0138 ENSG00000154889 | 213727_x_at | U133A |
| 1375 Rn30017146 | 0.0138 ENSG00000154889 | 209858_x_at | U133A |

|                 |        |                 |             |       |
|-----------------|--------|-----------------|-------------|-------|
| 1375 Rn30017146 | 0.0138 | ENSG00000154889 | 206764_x_at | U133A |
| 1375 Rn30017146 | 0.0138 | ENSG00000154889 | 213727_x_at | U133A |
| 1375 Rn30017146 | 0.0138 | ENSG00000154889 | 209858_x_at | U133A |
| 1375 Rn30017146 | 0.0138 | ENSG00000154889 | 206764_x_at | U133A |
| 1373 Rn30026585 | 0.0146 | ENSG00000171723 | 215578_at   | U133A |
| 1373 Rn30026585 | 0.0146 | ENSG00000171723 | 220773_s_at | U133A |
| 1373 Rn30026585 | 0.0146 | ENSG00000171723 | 215578_at   | U133A |
| 1373 Rn30026585 | 0.0146 | ENSG00000171723 | 220773_s_at | U133A |
| 1369 Rn30006271 | 0.0153 | ENSG00000162599 | 214294_at   | U133A |
| 1369 Rn30006271 | 0.0153 | ENSG00000162599 | 214295_at   | U133A |
| 1369 Rn30006271 | 0.0153 | ENSG00000162599 | 214294_at   | U133A |
| 1369 Rn30006271 | 0.0153 | ENSG00000162599 | 214295_at   | U133A |
| 1369 Rn30006271 | 0.0153 | ENSG00000162599 | 214294_at   | U133A |
| 1369 Rn30006271 | 0.0153 | ENSG00000162599 | 214295_at   | U133A |
| 1369 Rn30006271 | 0.0153 | ENSG00000162599 | 214294_at   | U133A |
| 1369 Rn30006271 | 0.0153 | ENSG00000162599 | 214295_at   | U133A |
| 1371 Rn30020892 | 0.0153 | ENSG00000187134 | 217626_at   | U133A |
| 1371 Rn30020892 | 0.0153 | ENSG00000187134 | 204151_x_at | U133A |
| 1371 Rn30020892 | 0.0153 | ENSG00000187134 | 216594_x_at | U133A |
| 1368 Rn30015015 | 0.0154 | ENSG00000100842 | 216265_x_at | U133A |
| 1368 Rn30015015 | 0.0154 | ENSG00000100842 | 204400_at   | U133A |
| 1368 Rn30015015 | 0.0154 | ENSG00000100842 | 210880_s_at | U133A |
| 1368 Rn30015015 | 0.0154 | ENSG00000100842 | 216265_x_at | U133A |
| 1368 Rn30015015 | 0.0154 | ENSG00000100842 | 204400_at   | U133A |
| 1368 Rn30015015 | 0.0154 | ENSG00000100842 | 210880_s_at | U133A |
| 1367 Rn30013623 | 0.0154 | ENSG00000132205 | 221980_at   | U133A |
| 1367 Rn30013623 | 0.0154 | ENSG00000132205 | 221980_at   | U133A |
| 1363 Rn30024431 | 0.016  | ENSG00000167656 | 206276_at   | U133A |
| 1360 Rn30010607 | 0.0165 | ENSG00000129315 | 206967_at   | U133A |
| 1360 Rn30010607 | 0.0165 | ENSG00000129315 | 40465_at    | U133A |
| 1359 Rn30002331 | 0.0166 | ENSG00000166396 | 206421_s_at | U133A |
| 1359 Rn30002331 | 0.0166 | ENSG00000166396 | 206421_s_at | U133A |
| 1358 Rn30015171 | 0.0166 | ENSG00000021355 | 212268_at   | U133A |
| 1358 Rn30015171 | 0.0166 | ENSG00000021355 | 213572_s_at | U133A |
| 1357 Rn30001869 | 0.0168 | ENSG00000163453 | 201162_at   | U133A |
| 1357 Rn30001869 | 0.0168 | ENSG00000163453 | 201163_s_at | U133A |
| 1357 Rn30001869 | 0.0168 | ENSG00000163453 | 213910_at   | U133A |
| 1355 Rn30012059 | 0.0171 | ENSG00000133710 | 205185_at   | U133A |
| 1355 Rn30012059 | 0.0171 | ENSG00000133710 | 205185_at   | U133A |
| 1353 Rn30002555 | 0.0183 | ENSG00000133026 | 212372_at   | U133A |
| 1353 Rn30002555 | 0.0183 | ENSG00000133026 | 213067_at   | U133A |
| 1353 Rn30002555 | 0.0183 | ENSG00000133026 | 213067_at   | U133A |
| 1351 Rn30023005 | 0.0191 | ENSG00000171476 | 211597_s_at | U133A |
| 1351 Rn30023005 | 0.0191 | ENSG00000171476 | 211597_s_at | U133A |
| 1351 Rn30023005 | 0.0191 | ENSG00000171476 | 211597_s_at | U133A |
| 1350 Rn30007593 | 0.0203 | ENSG00000197540 | 207460_at   | U133A |
| 1349 Rn30013264 | 0.0207 | ENSG00000186832 | 209800_at   | U133A |
| 1346 Rn30018658 | 0.0231 | ENSG00000186807 | 203074_at   | U133A |
| 1346 Rn30018658 | 0.0231 | ENSG00000186807 | 203074_at   | U133A |
| 1346 Rn30018658 | 0.0231 | ENSG00000186807 | 203074_at   | U133A |
| 1346 Rn30018658 | 0.0231 | ENSG00000186807 | 203074_at   | U133A |
| 1345 Rn30013382 | 0.0232 | ENSG00000168775 | 202712_s_at | U133A |
| 1344 R003599_01 | 0.0233 | ENSG00000136689 | 212657_s_at | U133A |



|                 |        |                 |             |       |
|-----------------|--------|-----------------|-------------|-------|
| 1334 Rn30016337 | 0.0317 | ENSG00000173848 | 201830_s_at | U133A |
| 1333 Rn30015661 | 0.032  | ENSG00000088756 | 220381_at   | U133A |
| 1333 Rn30015661 | 0.032  | ENSG00000088756 | 220382_s_at | U133A |
| 1333 Rn30015661 | 0.032  | ENSG00000088756 | 220381_at   | U133A |
| 1333 Rn30015661 | 0.032  | ENSG00000088756 | 220382_s_at | U133A |
| 1331 R000595_01 | 0.0339 | ENSG00000006210 | 203687_at   | U133A |
| 1331 R000595_01 | 0.0339 | ENSG00000006210 | 823_at      | U133A |
| 1330 Rn30015093 | 0.0339 | ENSG00000109861 | 201487_at   | U133A |
| 1330 Rn30015093 | 0.0339 | ENSG00000109861 | 201487_at   | U133A |
| 1332 R000003_01 | 0.0339 | ENSG00000090339 | 202637_s_at | U133A |
| 1332 R000003_01 | 0.0339 | ENSG00000090339 | 202638_s_at | U133A |
| 1332 R000003_01 | 0.0339 | ENSG00000090339 | 215485_s_at | U133A |
| 1329 Rn30017364 | 0.0346 | ENSG00000100100 | 221756_at   | U133A |
| 1329 Rn30017364 | 0.0346 | ENSG00000100100 | 221757_at   | U133A |
| 1329 Rn30017364 | 0.0346 | ENSG00000100100 | 221756_at   | U133A |
| 1329 Rn30017364 | 0.0346 | ENSG00000100100 | 221757_at   | U133A |
| 1328 Rn30008873 | 0.0373 | ENSG00000182866 | 204890_s_at | U133A |
| 1328 Rn30008873 | 0.0373 | ENSG00000182866 | 204891_s_at | U133A |
| 1328 Rn30008873 | 0.0373 | ENSG00000182866 | 221912_s_at | U133A |
| 1328 Rn30008873 | 0.0373 | ENSG00000182866 | 204890_s_at | U133A |
| 1328 Rn30008873 | 0.0373 | ENSG00000182866 | 204891_s_at | U133A |
| 1328 Rn30008873 | 0.0373 | ENSG00000182866 | 221912_s_at | U133A |
| 1328 Rn30008873 | 0.0373 | ENSG00000182866 | 204890_s_at | U133A |
| 1328 Rn30008873 | 0.0373 | ENSG00000182866 | 204891_s_at | U133A |
| 1328 Rn30008873 | 0.0373 | ENSG00000182866 | 221912_s_at | U133A |
| 1327 Rn30008035 | 0.0375 | ENSG00000130707 | 207076_s_at | U133A |
| 1326 Rn30016453 | 0.0378 | ENSG00000178363 | 210019_at   | U133A |
| 1326 Rn30016453 | 0.0378 | ENSG00000178363 | 210020_x_at | U133A |
| 1322 R001329_01 | 0.0413 | ENSG00000092295 | 206008_at   | U133A |
| 1316 R003989_01 | 0.0467 | ENSG00000150593 | 202730_s_at | U133A |
| 1316 R003989_01 | 0.0467 | ENSG00000150593 | 202731_at   | U133A |
| 1316 R003989_01 | 0.0467 | ENSG00000150593 | 212593_s_at | U133A |
| 1316 R003989_01 | 0.0467 | ENSG00000150593 | 212594_at   | U133A |
| 1316 R003989_01 | 0.0467 | ENSG00000150593 | 202730_s_at | U133A |
| 1316 R003989_01 | 0.0467 | ENSG00000150593 | 202731_at   | U133A |
| 1316 R003989_01 | 0.0467 | ENSG00000150593 | 212593_s_at | U133A |
| 1316 R003989_01 | 0.0467 | ENSG00000150593 | 212594_at   | U133A |
| 1316 R003989_01 | 0.0467 | ENSG00000150593 | 202730_s_at | U133A |
| 1316 R003989_01 | 0.0467 | ENSG00000150593 | 202731_at   | U133A |
| 1316 R003989_01 | 0.0467 | ENSG00000150593 | 212593_s_at | U133A |
| 1316 R003989_01 | 0.0467 | ENSG00000150593 | 212594_at   | U133A |
| 1315 R002276_01 | 0.0469 | ENSG00000148346 | 212531_at   | U133A |
| 1313 Rn30012806 | 0.0476 | ENSG00000096696 | 200606_at   | U133A |
| 1313 Rn30012806 | 0.0476 | ENSG00000096696 | 200606_at   | U133A |
| 1313 Rn30012806 | 0.0476 | ENSG00000096696 | 200606_at   | U133A |
| 1314 Rn30005025 | 0.0476 | ENSG00000132470 | 204989_s_at | U133A |
| 1314 Rn30005025 | 0.0476 | ENSG00000132470 | 204990_s_at | U133A |
| 1314 Rn30005025 | 0.0476 | ENSG00000132470 | 211905_s_at | U133A |
| 1314 Rn30005025 | 0.0476 | ENSG00000132470 | 214292_at   | U133A |
| 1314 Rn30005025 | 0.0476 | ENSG00000132470 | 204989_s_at | U133A |
| 1314 Rn30005025 | 0.0476 | ENSG00000132470 | 204990_s_at | U133A |
| 1314 Rn30005025 | 0.0476 | ENSG00000132470 | 211905_s_at | U133A |
| 1314 Rn30005025 | 0.0476 | ENSG00000132470 | 214292_at   | U133A |



|                 |        |                 |             |       |
|-----------------|--------|-----------------|-------------|-------|
| 1310 Rn30007882 | 0.0532 | ENSG00000149294 | 217359_s_at | U133A |
| 1310 Rn30007882 | 0.0532 | ENSG00000149294 | 209968_s_at | U133A |
| 1310 Rn30007882 | 0.0532 | ENSG00000149294 | 212843_at   | U133A |
| 1310 Rn30007882 | 0.0532 | ENSG00000149294 | 214952_at   | U133A |
| 1310 Rn30007882 | 0.0532 | ENSG00000149294 | 217359_s_at | U133A |
| 1309 Rn30013582 | 0.0537 | ENSG00000198300 | 209242_at   | U133A |
| 1309 Rn30013582 | 0.0537 | ENSG00000198300 | 209243_s_at | U133A |
| 1309 Rn30013582 | 0.0537 | ENSG00000198300 | 220653_at   | U133A |
| 1309 Rn30013582 | 0.0537 | ENSG00000198300 | 209242_at   | U133A |
| 1309 Rn30013582 | 0.0537 | ENSG00000198300 | 209243_s_at | U133A |
| 1309 Rn30013582 | 0.0537 | ENSG00000198300 | 220653_at   | U133A |
| 1309 Rn30013582 | 0.0537 | ENSG00000198300 | 209242_at   | U133A |
| 1309 Rn30013582 | 0.0537 | ENSG00000198300 | 209243_s_at | U133A |
| 1309 Rn30013582 | 0.0537 | ENSG00000198300 | 220653_at   | U133A |
| 1309 Rn30013582 | 0.0537 | ENSG00000198300 | 209242_at   | U133A |
| 1309 Rn30013582 | 0.0537 | ENSG00000198300 | 209243_s_at | U133A |
| 1309 Rn30013582 | 0.0537 | ENSG00000198300 | 220653_at   | U133A |
| 1304 Rn30009109 | 0.0583 | ENSG00000136425 | 205007_s_at | U133A |
| 1304 Rn30009109 | 0.0583 | ENSG00000136425 | 205008_s_at | U133A |
| 1303 Rn30014138 | 0.06   | ENSG00000143554 | 222217_s_at | U133A |
| 1303 Rn30014138 | 0.06   | ENSG00000143554 | 222217_s_at | U133A |
| 1300 Rn30018951 | 0.061  | ENSG00000130813 | 218429_s_at | U133A |
| 1300 Rn30018951 | 0.061  | ENSG00000130813 | 215645_at   | U133A |
| 1300 Rn30018951 | 0.061  | ENSG00000130813 | 53720_at    | U133A |
| 1300 Rn30018951 | 0.061  | ENSG00000130813 | 218429_s_at | U133A |
| 1300 Rn30018951 | 0.061  | ENSG00000130813 | 215645_at   | U133A |
| 1300 Rn30018951 | 0.061  | ENSG00000130813 | 53720_at    | U133A |
| 1300 Rn30018951 | 0.061  | ENSG00000130813 | 218429_s_at | U133A |
| 1300 Rn30018951 | 0.061  | ENSG00000130813 | 215645_at   | U133A |
| 1300 Rn30018951 | 0.061  | ENSG00000130813 | 53720_at    | U133A |
| 1300 Rn30018951 | 0.061  | ENSG00000130813 | 218429_s_at | U133A |
| 1300 Rn30018951 | 0.061  | ENSG00000130813 | 215645_at   | U133A |
| 1300 Rn30018951 | 0.061  | ENSG00000130813 | 53720_at    | U133A |
| 1300 Rn30018951 | 0.061  | ENSG00000130813 | 218429_s_at | U133A |
| 1300 Rn30018951 | 0.061  | ENSG00000130813 | 215645_at   | U133A |
| 1298 Rn30013084 | 0.0625 | ENSG00000117298 | 201749_at   | U133A |
| 1298 Rn30013084 | 0.0625 | ENSG00000117298 | 201750_s_at | U133A |
| 1298 Rn30013084 | 0.0625 | ENSG00000117298 | 201749_at   | U133A |
| 1298 Rn30013084 | 0.0625 | ENSG00000117298 | 201750_s_at | U133A |
| 1294 R000559_01 | 0.0647 | ENSG00000115641 | 202949_s_at | U133A |
| 1294 R000559_01 | 0.0647 | ENSG00000115641 | 202949_s_at | U133A |
| 1294 R000559_01 | 0.0647 | ENSG00000115641 | 202949_s_at | U133A |
| 1294 R000559_01 | 0.0647 | ENSG00000115641 | 202949_s_at | U133A |
| 1291 Rn30007970 | 0.0683 | ENSG00000095383 | 222173_s_at | U133A |
| 1291 Rn30007970 | 0.0683 | ENSG00000095383 | 222173_s_at | U133A |
| 1290 Rn30014443 | 0.0692 | ENSG00000118242 | 219648_at   | U133A |
| 1290 Rn30014443 | 0.0692 | ENSG00000118242 | 219648_at   | U133A |
| 1288 Rn30015909 | 0.0693 | ENSG00000150687 | 202458_at   | U133A |
| 1287 Rn30005305 | 0.0694 | ENSG00000177425 | 204004_at   | U133A |
| 1287 Rn30005305 | 0.0694 | ENSG00000177425 | 204005_s_at | U133A |
| 1287 Rn30005305 | 0.0694 | ENSG00000177425 | 214237_x_at | U133A |
| 1285 Rn30007859 | 0.0723 | ENSG00000146674 | 210095_s_at | U133A |

|                 |        |                 |             |       |
|-----------------|--------|-----------------|-------------|-------|
| 1285 Rn30007859 | 0.0723 | ENSG00000146674 | 212143_s_at | U133A |
| 1282 Rn30012112 | 0.0742 | ENSG00000142910 | 219058_x_at | U133A |
| 1282 Rn30012112 | 0.0742 | ENSG00000142910 | 219058_x_at | U133A |
| 1281 Rn30004826 | 0.0745 | ENSG00000060558 | 205349_at   | U133A |
| 1279 Rn30012805 | 0.0754 | ENSG00000184916 | 209784_s_at | U133A |
| 1279 Rn30012805 | 0.0754 | ENSG00000184916 | 32137_at    | U133A |
| 1279 Rn30012805 | 0.0754 | ENSG00000184916 | 209784_s_at | U133A |
| 1279 Rn30012805 | 0.0754 | ENSG00000184916 | 32137_at    | U133A |
| 1278 Rn30004335 | 0.0782 | ENSG00000073350 | 203713_s_at | U133A |
| 1274 R002705_01 | 0.0815 | ENSG00000100504 | 202990_at   | U133A |
| 1273 Rn30006695 | 0.0818 | ENSG00000104419 | 200632_s_at | U133A |
| 1273 Rn30006695 | 0.0818 | ENSG00000104419 | 200632_s_at | U133A |
| 1272 Rn30011340 | 0.082  | ENSG00000116017 | 205865_at   | U133A |
| 1271 Rn30021987 | 0.0827 | ENSG00000048740 | 202158_s_at | U133A |
| 1271 Rn30021987 | 0.0827 | ENSG00000048740 | 202157_s_at | U133A |
| 1271 Rn30021987 | 0.0827 | ENSG00000048740 | 202156_s_at | U133A |
| 1271 Rn30021987 | 0.0827 | ENSG00000048740 | 215147_at   | U133A |
| 1271 Rn30021987 | 0.0827 | ENSG00000048740 | 214405_at   | U133A |
| 1271 Rn30021987 | 0.0827 | ENSG00000048740 | 202158_s_at | U133A |
| 1271 Rn30021987 | 0.0827 | ENSG00000048740 | 202157_s_at | U133A |
| 1271 Rn30021987 | 0.0827 | ENSG00000048740 | 202156_s_at | U133A |
| 1271 Rn30021987 | 0.0827 | ENSG00000048740 | 215147_at   | U133A |
| 1271 Rn30021987 | 0.0827 | ENSG00000048740 | 214405_at   | U133A |
| 1271 Rn30021987 | 0.0827 | ENSG00000048740 | 202158_s_at | U133A |
| 1271 Rn30021987 | 0.0827 | ENSG00000048740 | 202157_s_at | U133A |
| 1271 Rn30021987 | 0.0827 | ENSG00000048740 | 202156_s_at | U133A |
| 1271 Rn30021987 | 0.0827 | ENSG00000048740 | 215147_at   | U133A |
| 1271 Rn30021987 | 0.0827 | ENSG00000048740 | 214405_at   | U133A |
| 1269 Rn30018154 | 0.0842 | ENSG00000090238 | 210396_s_at | U133A |
| 1268 R002247_01 | 0.0847 | ENSG00000173801 | 201015_s_at | U133A |
| 1268 R002247_01 | 0.0847 | ENSG00000173801 | 201015_s_at | U133A |
| 1268 R002247_01 | 0.0847 | ENSG00000173801 | 201015_s_at | U133A |
| 1265 R002455_01 | 0.0898 | ENSG00000114737 | 221223_x_at | U133A |
| 1265 R002455_01 | 0.0898 | ENSG00000114737 | 221223_x_at | U133A |
| 1265 R002455_01 | 0.0898 | ENSG00000114737 | 221223_x_at | U133A |
| 1264 Rn30004524 | 0.0902 | ENSG00000182809 | 208978_at   | U133A |
| 1263 Rn30007736 | 0.0909 | ENSG00000128283 | 204693_at   | U133A |
| 1263 Rn30007736 | 0.0909 | ENSG00000128283 | 204693_at   | U133A |
| 1262 Rn30014970 | 0.091  | ENSG00000066468 | 203638_s_at | U133A |
| 1262 Rn30014970 | 0.091  | ENSG00000066468 | 203639_s_at | U133A |
| 1262 Rn30014970 | 0.091  | ENSG00000066468 | 208225_at   | U133A |
| 1262 Rn30014970 | 0.091  | ENSG00000066468 | 208228_s_at | U133A |
| 1262 Rn30014970 | 0.091  | ENSG00000066468 | 208229_at   | U133A |
| 1262 Rn30014970 | 0.091  | ENSG00000066468 | 208234_x_at | U133A |
| 1262 Rn30014970 | 0.091  | ENSG00000066468 | 211398_at   | U133A |
| 1262 Rn30014970 | 0.091  | ENSG00000066468 | 211399_at   | U133A |
| 1262 Rn30014970 | 0.091  | ENSG00000066468 | 211400_at   | U133A |
| 1262 Rn30014970 | 0.091  | ENSG00000066468 | 211401_s_at | U133A |
| 1262 Rn30014970 | 0.091  | ENSG00000066468 | 203638_s_at | U133A |
| 1262 Rn30014970 | 0.091  | ENSG00000066468 | 203639_s_at | U133A |
| 1262 Rn30014970 | 0.091  | ENSG00000066468 | 208225_at   | U133A |
| 1262 Rn30014970 | 0.091  | ENSG00000066468 | 208228_s_at | U133A |
| 1262 Rn30014970 | 0.091  | ENSG00000066468 | 208229_at   | U133A |







|                 |                        |             |       |
|-----------------|------------------------|-------------|-------|
| 1257 Rn30013619 | 0.0966 ENSG00000115602 | 207526_s_at | U133A |
| 1257 Rn30013619 | 0.0966 ENSG00000115602 | 210442_at   | U133A |
| 1257 Rn30013619 | 0.0966 ENSG00000115602 | 207526_s_at | U133A |
| 1257 Rn30013619 | 0.0966 ENSG00000115602 | 210442_at   | U133A |
| 1255 Rn30000647 | 0.0985 ENSG00000137361 | 200904_at   | U133A |
| 1255 Rn30000647 | 0.0985 ENSG00000137361 | 200905_x_at | U133A |
| 1255 Rn30000647 | 0.0985 ENSG00000137361 | 217456_x_at | U133A |
| 1254 Rn30001120 | 0.0985 ENSG00000136213 | 218927_s_at | U133A |
| 1254 Rn30001120 | 0.0985 ENSG00000136213 | 218927_s_at | U133A |
| 1252 Rn30006667 | 0.1 ENSG00000196954    | 209310_s_at | U133A |
| 1252 Rn30006667 | 0.1 ENSG00000196954    | 213596_at   | U133A |
| 1252 Rn30006667 | 0.1 ENSG00000196954    | 209310_s_at | U133A |
| 1252 Rn30006667 | 0.1 ENSG00000196954    | 213596_at   | U133A |
| 1252 Rn30006667 | 0.1 ENSG00000196954    | 209310_s_at | U133A |
| 1252 Rn30006667 | 0.1 ENSG00000196954    | 213596_at   | U133A |
| 1251 R000917_01 | 0.101 ENSG00000169242  | 202023_at   | U133A |
| 1251 R000917_01 | 0.101 ENSG00000169242  | 202023_at   | U133A |
| 1249 Rn30014426 | 0.102 ENSG00000188064  | 217681_at   | U133A |
| 1248 Rn30026696 | 0.105 ENSG00000149269  | 209615_s_at | U133A |
| 1248 Rn30026696 | 0.105 ENSG00000149269  | 209615_s_at | U133A |
| 1248 Rn30026696 | 0.105 ENSG00000149269  | 209615_s_at | U133A |
| 1245 Rn30024351 | 0.109 ENSG00000160781  | 219236_at   | U133A |
| 1245 Rn30024351 | 0.109 ENSG00000160781  | 219236_at   | U133A |
| 1245 Rn30024351 | 0.109 ENSG00000160781  | 219236_at   | U133A |
| 1245 Rn30024351 | 0.109 ENSG00000160781  | 219236_at   | U133A |
| 1245 Rn30024351 | 0.109 ENSG00000160781  | 219236_at   | U133A |
| 1245 Rn30024351 | 0.109 ENSG00000160781  | 219236_at   | U133A |
| 1245 Rn30024351 | 0.109 ENSG00000160781  | 219236_at   | U133A |
| 1245 Rn30024351 | 0.109 ENSG00000160781  | 219236_at   | U133A |
| 1245 Rn30024351 | 0.109 ENSG00000160781  | 219236_at   | U133A |
| 1245 Rn30024351 | 0.109 ENSG00000160781  | 219236_at   | U133A |
| 1245 Rn30024351 | 0.109 ENSG00000160781  | 219236_at   | U133A |
| 1245 Rn30024351 | 0.109 ENSG00000160781  | 219236_at   | U133A |
| 1244 R005118_01 | 0.11 ENSG00000058085   | 207517_at   | U133A |
| 1244 R005118_01 | 0.11 ENSG00000058085   | 202267_at   | U133A |
| 1243 Rn30002459 | 0.11 ENSG00000109321   | 205239_at   | U133A |
| 1242 Rn30017486 | 0.111 ENSG00000182541  | 202193_at   | U133A |
| 1242 Rn30017486 | 0.111 ENSG00000182541  | 210582_s_at | U133A |
| 1242 Rn30017486 | 0.111 ENSG00000182541  | 217475_s_at | U133A |
| 1242 Rn30017486 | 0.111 ENSG00000182541  | 202193_at   | U133A |
| 1242 Rn30017486 | 0.111 ENSG00000182541  | 210582_s_at | U133A |
| 1242 Rn30017486 | 0.111 ENSG00000182541  | 217475_s_at | U133A |
| 1242 Rn30017486 | 0.111 ENSG00000182541  | 202193_at   | U133A |
| 1242 Rn30017486 | 0.111 ENSG00000182541  | 210582_s_at | U133A |
| 1242 Rn30017486 | 0.111 ENSG00000182541  | 217475_s_at | U133A |
| 1241 Rn30014463 | 0.114 ENSG00000102890  | 219411_at   | U133A |
| 1241 Rn30014463 | 0.114 ENSG00000102890  | 219411_at   | U133A |
| 1240 Rn30021321 | 0.115 ENSG00000073711  | 207749_s_at | U133A |
| 1240 Rn30021321 | 0.115 ENSG00000073711  | 209632_at   | U133A |
| 1240 Rn30021321 | 0.115 ENSG00000073711  | 209633_at   | U133A |
| 1240 Rn30021321 | 0.115 ENSG00000073711  | 207749_s_at | U133A |
| 1240 Rn30021321 | 0.115 ENSG00000073711  | 209632_at   | U133A |
| 1240 Rn30021321 | 0.115 ENSG00000073711  | 209633_at   | U133A |
| 1239 Rn30007194 | 0.116 ENSG00000138028  | 205937_at   | U133A |
| 1238 Rn30020842 | 0.117 ENSG00000164877  | 219332_at   | U133A |

|                 |                       |             |       |
|-----------------|-----------------------|-------------|-------|
| 1238 Rn30020842 | 0.117 ENSG00000164877 | 219332_at   | U133A |
| 1238 Rn30020842 | 0.117 ENSG00000164877 | 219332_at   | U133A |
| 1238 Rn30020842 | 0.117 ENSG00000164877 | 219332_at   | U133A |
| 1238 Rn30020842 | 0.117 ENSG00000164877 | 219332_at   | U133A |
| 1238 Rn30020842 | 0.117 ENSG00000164877 | 219332_at   | U133A |
| 1236 R000385_01 | 0.122 ENSG00000167535 | 209530_at   | U133A |
| 1236 R000385_01 | 0.122 ENSG00000167535 | 34726_at    | U133A |
| 1235 R004970_01 | 0.123 ENSG00000143162 | 201200_at   | U133A |
| 1234 Rn30012989 | 0.124 ENSG00000119900 | 219582_at   | U133A |
| 1234 Rn30012989 | 0.124 ENSG00000119900 | 219582_at   | U133A |
| 1230 Rn30012936 | 0.126 ENSG00000171401 | 207935_s_at | U133A |
| 1230 Rn30012936 | 0.126 ENSG00000171401 | 207935_s_at | U133A |
| 1231 R002052_01 | 0.126 ENSG00000129521 | 219232_s_at | U133A |
| 1227 R001313_01 | 0.129 ENSG00000198610 | 210558_at   | U133A |
| 1228 R001495_01 | 0.129 ENSG00000150281 | 206813_at   | U133A |
| 1225 Rn30017105 | 0.131 ENSG00000148677 | 206029_at   | U133A |
| 1225 Rn30017105 | 0.131 ENSG00000148677 | 206029_at   | U133A |
| 1223 Rn30005966 | 0.134 ENSG00000036672 | 207213_s_at | U133A |
| 1223 Rn30005966 | 0.134 ENSG00000036672 | 207213_s_at | U133A |
| 1223 Rn30005966 | 0.134 ENSG00000036672 | 207213_s_at | U133A |
| 1219 Rn30018004 | 0.136 ENSG00000010278 | 201005_at   | U133A |
| 1221 Rn30012434 | 0.136 ENSG00000186144 | 205402_x_at | U133A |
| 1221 Rn30012434 | 0.136 ENSG00000186144 | 205869_at   | U133A |
| 1221 Rn30012434 | 0.136 ENSG00000186144 | 210915_x_at | U133A |
| 1221 Rn30012434 | 0.136 ENSG00000186144 | 211608_at   | U133A |
| 1221 Rn30012434 | 0.136 ENSG00000186144 | 211796_s_at | U133A |
| 1221 Rn30012434 | 0.136 ENSG00000186144 | 213193_x_at | U133A |
| 1221 Rn30012434 | 0.136 ENSG00000186144 | 215395_x_at | U133A |
| 1221 Rn30012434 | 0.136 ENSG00000186144 | 216470_x_at | U133A |
| 1221 Rn30012434 | 0.136 ENSG00000186144 | 216470_x_at | U133A |
| 1221 Rn30012434 | 0.136 ENSG00000186144 | 216857_at   | U133A |
| 1221 Rn30012434 | 0.136 ENSG00000186144 | 217060_at   | U133A |
| 1221 Rn30012434 | 0.136 ENSG00000186144 | 217326_x_at | U133A |
| 1221 Rn30012434 | 0.136 ENSG00000186144 | 205402_x_at | U133A |
| 1221 Rn30012434 | 0.136 ENSG00000186144 | 205869_at   | U133A |
| 1221 Rn30012434 | 0.136 ENSG00000186144 | 210915_x_at | U133A |
| 1221 Rn30012434 | 0.136 ENSG00000186144 | 211608_at   | U133A |
| 1221 Rn30012434 | 0.136 ENSG00000186144 | 211796_s_at | U133A |
| 1221 Rn30012434 | 0.136 ENSG00000186144 | 213193_x_at | U133A |
| 1221 Rn30012434 | 0.136 ENSG00000186144 | 215395_x_at | U133A |
| 1221 Rn30012434 | 0.136 ENSG00000186144 | 216470_x_at | U133A |
| 1221 Rn30012434 | 0.136 ENSG00000186144 | 216470_x_at | U133A |
| 1221 Rn30012434 | 0.136 ENSG00000186144 | 216857_at   | U133A |
| 1221 Rn30012434 | 0.136 ENSG00000186144 | 217060_at   | U133A |
| 1221 Rn30012434 | 0.136 ENSG00000186144 | 217326_x_at | U133A |
| 1220 R002744_01 | 0.136 ENSG00000107130 | 218266_s_at | U133A |
| 1217 Rn30018505 | 0.138 ENSG00000184545 | 206374_at   | U133A |
| 1215 Rn30003533 | 0.139 ENSG00000120129 | 201041_s_at | U133A |
| 1215 Rn30003533 | 0.139 ENSG00000120129 | 201044_x_at | U133A |
| 1213 Rn30013137 | 0.14 ENSG00000111679  | 208871_at   | U133A |
| 1213 Rn30013137 | 0.14 ENSG00000111679  | 40489_at    | U133A |
| 1213 Rn30013137 | 0.14 ENSG00000111679  | 211076_x_at | U133A |
| 1213 Rn30013137 | 0.14 ENSG00000111679  | 206687_s_at | U133A |

|                 |       |                 |             |       |
|-----------------|-------|-----------------|-------------|-------|
| 1213 Rn30013137 | 0.14  | ENSG00000111679 | 208871_at   | U133A |
| 1213 Rn30013137 | 0.14  | ENSG00000111679 | 40489_at    | U133A |
| 1213 Rn30013137 | 0.14  | ENSG00000111679 | 211076_x_at | U133A |
| 1213 Rn30013137 | 0.14  | ENSG00000111679 | 206687_s_at | U133A |
| 1213 Rn30013137 | 0.14  | ENSG00000111679 | 206687_s_at | U133A |
| 1213 Rn30013137 | 0.14  | ENSG00000111679 | 206687_s_at | U133A |
| 1211 R000670_01 | 0.141 | ENSG00000170017 | 201951_at   | U133A |
| 1211 R000670_01 | 0.141 | ENSG00000170017 | 201952_at   | U133A |
| 1209 Rn30010451 | 0.144 | ENSG00000065613 | 206874_s_at | U133A |
| 1209 Rn30010451 | 0.144 | ENSG00000065613 | 206875_s_at | U133A |
| 1209 Rn30010451 | 0.144 | ENSG00000065613 | 206874_s_at | U133A |
| 1209 Rn30010451 | 0.144 | ENSG00000065613 | 206875_s_at | U133A |
| 1207 Rn30019310 | 0.145 | ENSG00000014216 | 200752_s_at | U133A |
| 1208 R003030_01 | 0.145 | ENSG00000099940 | 218327_s_at | U133A |
| 1203 Rn30017362 | 0.149 | ENSG00000101986 | 205142_x_at | U133A |
| 1202 Rn30017686 | 0.151 | ENSG00000173156 | 209885_at   | U133A |
| 1202 Rn30017686 | 0.151 | ENSG00000173156 | 31846_at    | U133A |
| 1197 Rn30003786 | 0.155 | ENSG00000143198 | 201403_s_at | U133A |
| 1198 Rn30016272 | 0.155 | ENSG00000001617 | 206832_s_at | U133A |
| 1198 Rn30016272 | 0.155 | ENSG00000001617 | 209730_at   | U133A |
| 1198 Rn30016272 | 0.155 | ENSG00000001617 | 35666_at    | U133A |
| 1195 R002440_01 | 0.162 | ENSG00000103150 | 218869_at   | U133A |
| 1194 Rn30006778 | 0.165 | ENSG00000135373 | 219850_s_at | U133A |
| 1194 Rn30006778 | 0.165 | ENSG00000135373 | 219850_s_at | U133A |
| 1192 Rn30019191 | 0.169 | ENSG00000168056 | 219922_s_at | U133A |
| 1192 Rn30019191 | 0.169 | ENSG00000168056 | 219922_s_at | U133A |
| 1192 Rn30019191 | 0.169 | ENSG00000168056 | 219922_s_at | U133A |
| 1192 Rn30019191 | 0.169 | ENSG00000168056 | 219922_s_at | U133A |
| 1192 Rn30019191 | 0.169 | ENSG00000168056 | 219922_s_at | U133A |
| 1192 Rn30019191 | 0.169 | ENSG00000168056 | 219922_s_at | U133A |
| 1190 R001688_01 | 0.171 | ENSG00000196083 | 220880_at   | U133A |
| 1190 R001688_01 | 0.171 | ENSG00000196083 | 210233_at   | U133A |
| 1190 R001688_01 | 0.171 | ENSG00000196083 | 205227_at   | U133A |
| 1190 R001688_01 | 0.171 | ENSG00000196083 | 220880_at   | U133A |
| 1190 R001688_01 | 0.171 | ENSG00000196083 | 210233_at   | U133A |
| 1190 R001688_01 | 0.171 | ENSG00000196083 | 205227_at   | U133A |
| 1190 R001688_01 | 0.171 | ENSG00000196083 | 205227_at   | U133A |
| 1191 R002614_01 | 0.171 | ENSG00000102854 | 204885_s_at | U133A |
| 1191 R002614_01 | 0.171 | ENSG00000102854 | 204885_s_at | U133A |
| 1187 Rn30000430 | 0.173 | ENSG00000146192 | 215602_at   | U133A |
| 1187 Rn30000430 | 0.173 | ENSG00000146192 | 215602_at   | U133A |
| 1187 Rn30000430 | 0.173 | ENSG00000146192 | 215602_at   | U133A |
| 1186 Rn30011973 | 0.174 | ENSG00000140379 | 205681_at   | U133A |
| 1186 Rn30011973 | 0.174 | ENSG00000140379 | 205681_at   | U133A |
| 1185 Rn30015950 | 0.174 | ENSG00000107829 | 215742_at   | U133A |
| 1185 Rn30015950 | 0.174 | ENSG00000107829 | 221519_at   | U133A |
| 1185 Rn30015950 | 0.174 | ENSG00000107829 | 215742_at   | U133A |
| 1185 Rn30015950 | 0.174 | ENSG00000107829 | 221519_at   | U133A |
| 1185 Rn30015950 | 0.174 | ENSG00000107829 | 215742_at   | U133A |
| 1185 Rn30015950 | 0.174 | ENSG00000107829 | 221519_at   | U133A |
| 1185 Rn30015950 | 0.174 | ENSG00000107829 | 215742_at   | U133A |
| 1185 Rn30015950 | 0.174 | ENSG00000107829 | 221519_at   | U133A |
| 1181 Rn30008306 | 0.176 | ENSG00000175130 | 200644_at   | U133A |

|                 |       |                 |             |       |
|-----------------|-------|-----------------|-------------|-------|
| 1184 R004288_01 | 0.176 | ENSG00000065357 | 203385_at   | U133A |
| 1184 R004288_01 | 0.176 | ENSG00000065357 | 211272_s_at | U133A |
| 1184 R004288_01 | 0.176 | ENSG00000065357 | 203385_at   | U133A |
| 1184 R004288_01 | 0.176 | ENSG00000065357 | 211272_s_at | U133A |
| 1184 R004288_01 | 0.176 | ENSG00000065357 | 203385_at   | U133A |
| 1184 R004288_01 | 0.176 | ENSG00000065357 | 211272_s_at | U133A |
| 1184 R004288_01 | 0.176 | ENSG00000065357 | 203385_at   | U133A |
| 1184 R004288_01 | 0.176 | ENSG00000065357 | 211272_s_at | U133A |
| 1184 R004288_01 | 0.176 | ENSG00000065357 | 203385_at   | U133A |
| 1184 R004288_01 | 0.176 | ENSG00000065357 | 211272_s_at | U133A |
| 1184 R004288_01 | 0.176 | ENSG00000065357 | 203385_at   | U133A |
| 1184 R004288_01 | 0.176 | ENSG00000065357 | 211272_s_at | U133A |
| 1184 R004288_01 | 0.176 | ENSG00000065357 | 203385_at   | U133A |
| 1184 R004288_01 | 0.176 | ENSG00000065357 | 211272_s_at | U133A |
| 1184 R004288_01 | 0.176 | ENSG00000065357 | 203385_at   | U133A |
| 1184 R004288_01 | 0.176 | ENSG00000065357 | 211272_s_at | U133A |
| 1184 R004288_01 | 0.176 | ENSG00000065357 | 203385_at   | U133A |
| 1184 R004288_01 | 0.176 | ENSG00000065357 | 211272_s_at | U133A |
| 1179 Rn30000185 | 0.177 | ENSG00000140995 | 219646_at   | U133A |
| 1179 Rn30000185 | 0.177 | ENSG00000140995 | 219646_at   | U133A |
| 1178 Rn30013076 | 0.178 | ENSG00000169860 | 207455_at   | U133A |
| 1175 R003412_01 | 0.18  | ENSG00000081913 | 212719_at   | U133A |
| 1174 Rn30001598 | 0.18  | ENSG00000156931 | 209553_at   | U133A |
| 1171 R003734_01 | 0.183 | ENSG00000187688 | 219282_s_at | U133A |
| 1170 Rn30014274 | 0.184 | ENSG00000135631 | 210879_s_at | U133A |
| 1170 Rn30014274 | 0.184 | ENSG00000135631 | 210879_s_at | U133A |
| 1168 Rn30013350 | 0.186 | ENSG00000166833 | 218330_s_at | U133A |
| 1168 Rn30013350 | 0.186 | ENSG00000166833 | 218330_s_at | U133A |
| 1168 Rn30013350 | 0.186 | ENSG00000166833 | 218330_s_at | U133A |
| 1168 Rn30013350 | 0.186 | ENSG00000166833 | 218330_s_at | U133A |
| 1167 Rn30023430 | 0.187 | ENSG00000143466 | 214398_s_at | U133A |
| 1167 Rn30023430 | 0.187 | ENSG00000143466 | 204549_at   | U133A |
| 1164 Rn30011035 | 0.188 | ENSG00000182326 | 208747_s_at | U133A |
| 1164 Rn30011035 | 0.188 | ENSG00000182326 | 208747_s_at | U133A |
| 1163 Rn30001167 | 0.189 | ENSG00000164828 | 206487_at   | U133A |
| 1163 Rn30001167 | 0.189 | ENSG00000164828 | 214169_at   | U133A |
| 1163 Rn30001167 | 0.189 | ENSG00000164828 | 212074_at   | U133A |
| 1163 Rn30001167 | 0.189 | ENSG00000164828 | 206487_at   | U133A |
| 1163 Rn30001167 | 0.189 | ENSG00000164828 | 214169_at   | U133A |
| 1163 Rn30001167 | 0.189 | ENSG00000164828 | 212074_at   | U133A |
| 1163 Rn30001167 | 0.189 | ENSG00000164828 | 206487_at   | U133A |
| 1163 Rn30001167 | 0.189 | ENSG00000164828 | 214169_at   | U133A |
| 1163 Rn30001167 | 0.189 | ENSG00000164828 | 212074_at   | U133A |
| 1160 Rn30010554 | 0.19  | ENSG00000129667 | 219202_at   | U133A |
| 1159 Rn30014415 | 0.19  | ENSG00000162496 | 202481_at   | U133A |
| 1152 Rn30001580 | 0.198 | ENSG00000114859 | 213499_at   | U133A |
| 1152 Rn30001580 | 0.198 | ENSG00000114859 | 213499_at   | U133A |
| 1152 Rn30001580 | 0.198 | ENSG00000114859 | 213499_at   | U133A |
| 1152 Rn30001580 | 0.198 | ENSG00000114859 | 213499_at   | U133A |
| 1150 Rn30006743 | 0.199 | ENSG00000101384 | 209097_s_at | U133A |
| 1150 Rn30006743 | 0.199 | ENSG00000101384 | 209099_x_at | U133A |
| 1150 Rn30006743 | 0.199 | ENSG00000101384 | 216268_s_at | U133A |
| 1150 Rn30006743 | 0.199 | ENSG00000101384 | 209098_s_at | U133A |
| 1149 Rn30000360 | 0.201 | ENSG00000197499 | 211528_x_at | U133A |
| 1149 Rn30000360 | 0.201 | ENSG00000197499 | 215313_x_at | U133A |

|                 |       |                 |             |       |
|-----------------|-------|-----------------|-------------|-------|
| 1149 Rn30000360 | 0.201 | ENSG00000197499 | 213932_x_at | U133A |
| 1149 Rn30000360 | 0.201 | ENSG00000197499 | 211528_x_at | U133A |
| 1149 Rn30000360 | 0.201 | ENSG00000197499 | 215313_x_at | U133A |
| 1149 Rn30000360 | 0.201 | ENSG00000197499 | 213932_x_at | U133A |
| 1146 Rn30017375 | 0.204 | ENSG00000172830 | 219241_x_at | U133A |
| 1146 Rn30017375 | 0.204 | ENSG00000172830 | 219919_s_at | U133A |
| 1146 Rn30017375 | 0.204 | ENSG00000172830 | 51192_at    | U133A |
| 1146 Rn30017375 | 0.204 | ENSG00000172830 | 219241_x_at | U133A |
| 1146 Rn30017375 | 0.204 | ENSG00000172830 | 219919_s_at | U133A |
| 1146 Rn30017375 | 0.204 | ENSG00000172830 | 51192_at    | U133A |
| 1146 Rn30017375 | 0.204 | ENSG00000172830 | 219241_x_at | U133A |
| 1146 Rn30017375 | 0.204 | ENSG00000172830 | 219919_s_at | U133A |
| 1146 Rn30017375 | 0.204 | ENSG00000172830 | 51192_at    | U133A |
| 1146 Rn30017375 | 0.204 | ENSG00000172830 | 219241_x_at | U133A |
| 1146 Rn30017375 | 0.204 | ENSG00000172830 | 219919_s_at | U133A |
| 1146 Rn30017375 | 0.204 | ENSG00000172830 | 51192_at    | U133A |
| 1146 Rn30017375 | 0.204 | ENSG00000172830 | 219241_x_at | U133A |
| 1146 Rn30017375 | 0.204 | ENSG00000172830 | 219919_s_at | U133A |
| 1146 Rn30017375 | 0.204 | ENSG00000172830 | 51192_at    | U133A |
| 1145 Rn30008321 | 0.207 | ENSG00000163874 | 218810_at   | U133A |
| 1143 Rn30002489 | 0.208 | ENSG00000081041 | 209774_x_at | U133A |
| 1143 Rn30002489 | 0.208 | ENSG00000081041 | 209774_x_at | U133A |
| 1140 R004613_01 | 0.209 | ENSG00000183087 | 1598_g_at   | U133A |
| 1140 R004613_01 | 0.209 | ENSG00000183087 | 202177_at   | U133A |
| 1140 R004613_01 | 0.209 | ENSG00000183087 | 1598_g_at   | U133A |
| 1140 R004613_01 | 0.209 | ENSG00000183087 | 202177_at   | U133A |
| 1140 R004613_01 | 0.209 | ENSG00000183087 | 1598_g_at   | U133A |
| 1140 R004613_01 | 0.209 | ENSG00000183087 | 202177_at   | U133A |
| 1138 Rn30017812 | 0.21  | ENSG00000108392 | 209154_at   | U133A |
| 1138 Rn30017812 | 0.21  | ENSG00000108392 | 215464_s_at | U133A |
| 1137 Rn30009921 | 0.21  | ENSG00000164741 | 210762_s_at | U133A |
| 1137 Rn30009921 | 0.21  | ENSG00000164741 | 220511_s_at | U133A |
| 1137 Rn30009921 | 0.21  | ENSG00000164741 | 220512_at   | U133A |
| 1137 Rn30009921 | 0.21  | ENSG00000164741 | 210762_s_at | U133A |
| 1137 Rn30009921 | 0.21  | ENSG00000164741 | 220511_s_at | U133A |
| 1137 Rn30009921 | 0.21  | ENSG00000164741 | 220512_at   | U133A |
| 1139 Rn30009482 | 0.21  | ENSG00000164733 | 213274_s_at | U133A |
| 1139 Rn30009482 | 0.21  | ENSG00000164733 | 213275_x_at | U133A |
| 1139 Rn30009482 | 0.21  | ENSG00000164733 | 200838_at   | U133A |
| 1139 Rn30009482 | 0.21  | ENSG00000164733 | 200839_s_at | U133A |
| 1139 Rn30009482 | 0.21  | ENSG00000164733 | 213274_s_at | U133A |
| 1139 Rn30009482 | 0.21  | ENSG00000164733 | 213275_x_at | U133A |
| 1139 Rn30009482 | 0.21  | ENSG00000164733 | 200838_at   | U133A |
| 1139 Rn30009482 | 0.21  | ENSG00000164733 | 200839_s_at | U133A |
| 1136 R000567_01 | 0.211 | ENSG00000171867 | 201300_s_at | U133A |
| 1136 R000567_01 | 0.211 | ENSG00000171867 | 215707_s_at | U133A |
| 1133 Rn30001178 | 0.213 | ENSG00000186716 | 202315_s_at | U133A |
| 1133 Rn30001178 | 0.213 | ENSG00000186716 | 217223_s_at | U133A |
| 1133 Rn30001178 | 0.213 | ENSG00000186716 | 214623_at   | U133A |
| 1133 Rn30001178 | 0.213 | ENSG00000186716 | 202315_s_at | U133A |
| 1133 Rn30001178 | 0.213 | ENSG00000186716 | 217223_s_at | U133A |
| 1133 Rn30001178 | 0.213 | ENSG00000186716 | 214623_at   | U133A |
| 1133 Rn30001178 | 0.213 | ENSG00000186716 | 202315_s_at | U133A |
| 1133 Rn30001178 | 0.213 | ENSG00000186716 | 217223_s_at | U133A |
| 1133 Rn30001178 | 0.213 | ENSG00000186716 | 214623_at   | U133A |
| 1133 Rn30001178 | 0.213 | ENSG00000186716 | 202315_s_at | U133A |













|                 |       |                 |             |       |
|-----------------|-------|-----------------|-------------|-------|
| 1125 Rn30015442 | 0.219 | ENSG00000171608 | 211230_s_at | U133A |
| 1125 Rn30015442 | 0.219 | ENSG00000171608 | 203879_at   | U133A |
| 1125 Rn30015442 | 0.219 | ENSG00000171608 | 211230_s_at | U133A |
| 1123 Rn30018875 | 0.22  | ENSG00000107679 | 219024_at   | U133A |
| 1122 Rn30008129 | 0.221 | ENSG00000134954 | 214447_at   | U133A |
| 1122 Rn30008129 | 0.221 | ENSG00000134954 | 214447_at   | U133A |
| 1121 R003979_01 | 0.222 | ENSG00000165806 | 207181_s_at | U133A |
| 1121 R003979_01 | 0.222 | ENSG00000165806 | 207181_s_at | U133A |
| 1121 R003979_01 | 0.222 | ENSG00000165806 | 207181_s_at | U133A |
| 1120 Rn30026671 | 0.223 | ENSG00000171017 | 220174_at   | U133A |
| 1118 Rn30010059 | 0.225 | ENSG00000099219 | 218342_s_at | U133A |
| 1118 Rn30010059 | 0.225 | ENSG00000099219 | 218342_s_at | U133A |
| 1118 Rn30010059 | 0.225 | ENSG00000099219 | 218342_s_at | U133A |
| 1118 Rn30010059 | 0.225 | ENSG00000099219 | 218342_s_at | U133A |
| 1116 Rn30017767 | 0.226 | ENSG00000077150 | 207535_s_at | U133A |
| 1116 Rn30017767 | 0.226 | ENSG00000077150 | 209636_at   | U133A |
| 1116 Rn30017767 | 0.226 | ENSG00000077150 | 211524_at   | U133A |
| 1116 Rn30017767 | 0.226 | ENSG00000077150 | 207535_s_at | U133A |
| 1116 Rn30017767 | 0.226 | ENSG00000077150 | 209636_at   | U133A |
| 1116 Rn30017767 | 0.226 | ENSG00000077150 | 211524_at   | U133A |
| 1117 Rn30006415 | 0.226 | ENSG00000100600 | 201212_at   | U133A |
| 1117 Rn30006415 | 0.226 | ENSG00000100600 | 201212_at   | U133A |
| 1117 Rn30006415 | 0.226 | ENSG00000100600 | 201212_at   | U133A |
| 1114 Rn30018112 | 0.227 | ENSG00000103490 | 221666_s_at | U133A |
| 1114 Rn30018112 | 0.227 | ENSG00000103490 | 221666_s_at | U133A |
| 1114 Rn30018112 | 0.227 | ENSG00000103490 | 221666_s_at | U133A |
| 1115 Rn30012770 | 0.227 | ENSG00000124107 | 203021_at   | U133A |
| 1113 R002913_01 | 0.228 | ENSG00000159388 | 201235_s_at | U133A |
| 1113 R002913_01 | 0.228 | ENSG00000159388 | 201236_s_at | U133A |
| 1112 Rn30010530 | 0.228 | ENSG00000147324 | 213457_at   | U133A |
| 1111 Rn30016690 | 0.23  | ENSG00000172183 | 204698_at   | U133A |
| 1111 Rn30016690 | 0.23  | ENSG00000172183 | 33304_at    | U133A |
| 1111 Rn30016690 | 0.23  | ENSG00000172183 | 204698_at   | U133A |
| 1111 Rn30016690 | 0.23  | ENSG00000172183 | 33304_at    | U133A |
| 1110 Rn30018770 | 0.231 | ENSG00000149485 | 204257_at   | U133A |
| 1110 Rn30018770 | 0.231 | ENSG00000149485 | 208962_s_at | U133A |
| 1110 Rn30018770 | 0.231 | ENSG00000149485 | 208963_x_at | U133A |
| 1110 Rn30018770 | 0.231 | ENSG00000149485 | 208964_s_at | U133A |
| 1110 Rn30018770 | 0.231 | ENSG00000149485 | 216080_s_at | U133A |
| 1110 Rn30018770 | 0.231 | ENSG00000149485 | 208962_s_at | U133A |
| 1110 Rn30018770 | 0.231 | ENSG00000149485 | 208963_x_at | U133A |
| 1110 Rn30018770 | 0.231 | ENSG00000149485 | 208964_s_at | U133A |
| 1110 Rn30018770 | 0.231 | ENSG00000149485 | 208962_s_at | U133A |
| 1110 Rn30018770 | 0.231 | ENSG00000149485 | 208963_x_at | U133A |
| 1110 Rn30018770 | 0.231 | ENSG00000149485 | 208964_s_at | U133A |
| 1110 Rn30018770 | 0.231 | ENSG00000149485 | 204257_at   | U133A |
| 1110 Rn30018770 | 0.231 | ENSG00000149485 | 216080_s_at | U133A |
| 1110 Rn30018770 | 0.231 | ENSG00000149485 | 204257_at   | U133A |
| 1110 Rn30018770 | 0.231 | ENSG00000149485 | 216080_s_at | U133A |
| 1110 Rn30018770 | 0.231 | ENSG00000149485 | 204257_at   | U133A |
| 1110 Rn30018770 | 0.231 | ENSG00000149485 | 216080_s_at | U133A |
| 1110 Rn30018770 | 0.231 | ENSG00000149485 | 204257_at   | U133A |
| 1110 Rn30018770 | 0.231 | ENSG00000149485 | 208962_s_at | U133A |

|                 |       |                 |             |       |
|-----------------|-------|-----------------|-------------|-------|
| 1110 Rn30018770 | 0.231 | ENSG00000149485 | 208963_x_at | U133A |
| 1110 Rn30018770 | 0.231 | ENSG00000149485 | 208964_s_at | U133A |
| 1110 Rn30018770 | 0.231 | ENSG00000149485 | 216080_s_at | U133A |
| 1110 Rn30018770 | 0.231 | ENSG00000149485 | 208962_s_at | U133A |
| 1110 Rn30018770 | 0.231 | ENSG00000149485 | 208963_x_at | U133A |
| 1110 Rn30018770 | 0.231 | ENSG00000149485 | 208964_s_at | U133A |
| 1110 Rn30018770 | 0.231 | ENSG00000149485 | 208962_s_at | U133A |
| 1110 Rn30018770 | 0.231 | ENSG00000149485 | 208963_x_at | U133A |
| 1110 Rn30018770 | 0.231 | ENSG00000149485 | 208964_s_at | U133A |
| 1110 Rn30018770 | 0.231 | ENSG00000149485 | 204257_at   | U133A |
| 1110 Rn30018770 | 0.231 | ENSG00000149485 | 216080_s_at | U133A |
| 1110 Rn30018770 | 0.231 | ENSG00000149485 | 204257_at   | U133A |
| 1110 Rn30018770 | 0.231 | ENSG00000149485 | 216080_s_at | U133A |
| 1110 Rn30018770 | 0.231 | ENSG00000149485 | 204257_at   | U133A |
| 1110 Rn30018770 | 0.231 | ENSG00000149485 | 216080_s_at | U133A |
| 1108 Rn30019925 | 0.233 | ENSG00000156299 | 206409_at   | U133A |
| 1108 Rn30019925 | 0.233 | ENSG00000156299 | 213135_at   | U133A |
| 1107 R002183_01 | 0.233 | ENSG00000107438 | 208690_s_at | U133A |
| 1109 Rn30003259 | 0.233 | ENSG00000141503 | 209241_x_at | U133A |
| 1109 Rn30003259 | 0.233 | ENSG00000141503 | 214625_s_at | U133A |
| 1109 Rn30003259 | 0.233 | ENSG00000141503 | 215909_x_at | U133A |
| 1109 Rn30003259 | 0.233 | ENSG00000141503 | 209241_x_at | U133A |
| 1109 Rn30003259 | 0.233 | ENSG00000141503 | 214625_s_at | U133A |
| 1109 Rn30003259 | 0.233 | ENSG00000141503 | 215909_x_at | U133A |
| 1109 Rn30003259 | 0.233 | ENSG00000141503 | 209241_x_at | U133A |
| 1109 Rn30003259 | 0.233 | ENSG00000141503 | 214625_s_at | U133A |
| 1109 Rn30003259 | 0.233 | ENSG00000141503 | 215909_x_at | U133A |
| 1109 Rn30003259 | 0.233 | ENSG00000141503 | 209241_x_at | U133A |
| 1109 Rn30003259 | 0.233 | ENSG00000141503 | 214625_s_at | U133A |
| 1109 Rn30003259 | 0.233 | ENSG00000141503 | 215909_x_at | U133A |
| 1106 Rn30005756 | 0.233 | ENSG00000141736 | 210930_s_at | U133A |
| 1106 Rn30005756 | 0.233 | ENSG00000141736 | 216836_s_at | U133A |
| 1106 Rn30005756 | 0.233 | ENSG00000141736 | 216836_s_at | U133A |
| 1106 Rn30005756 | 0.233 | ENSG00000141736 | 210930_s_at | U133A |
| 1106 Rn30005756 | 0.233 | ENSG00000141736 | 216836_s_at | U133A |
| 1106 Rn30005756 | 0.233 | ENSG00000141736 | 216836_s_at | U133A |
| 1105 Rn30010662 | 0.234 | ENSG00000105514 | 208466_at   | U133A |
| 1103 Rn30008518 | 0.236 | ENSG00000167880 | 204503_at   | U133A |
| 1100 Rn30025394 | 0.237 | ENSG00000166997 | 217700_at   | U133A |
| 1099 Rn30012954 | 0.237 | ENSG00000124374 | 221868_at   | U133A |
| 1101 Rn30001596 | 0.237 | ENSG00000182580 | 1438_at     | U133A |
| 1101 Rn30001596 | 0.237 | ENSG00000182580 | 204600_at   | U133A |
| 1098 Rn30015691 | 0.238 | ENSG00000168994 | 212923_s_at | U133A |
| 1098 Rn30015691 | 0.238 | ENSG00000168994 | 212923_s_at | U133A |
| 1096 R002191_01 | 0.239 | ENSG00000176046 | 209230_s_at | U133A |
| 1094 Rn30001607 | 0.24  | ENSG00000061938 | 216439_at   | U133A |
| 1094 Rn30001607 | 0.24  | ENSG00000061938 | 203838_s_at | U133A |
| 1094 Rn30001607 | 0.24  | ENSG00000061938 | 203839_s_at | U133A |
| 1094 Rn30001607 | 0.24  | ENSG00000061938 | 216439_at   | U133A |
| 1094 Rn30001607 | 0.24  | ENSG00000061938 | 203838_s_at | U133A |
| 1094 Rn30001607 | 0.24  | ENSG00000061938 | 203839_s_at | U133A |
| 1093 Rn30003408 | 0.242 | ENSG00000065559 | 203265_s_at | U133A |
| 1093 Rn30003408 | 0.242 | ENSG00000065559 | 203266_s_at | U133A |

|                 |       |                 |             |       |
|-----------------|-------|-----------------|-------------|-------|
| 1090 Rn30006722 | 0.243 | ENSG00000160293 | 205536_at   | U133A |
| 1090 Rn30006722 | 0.243 | ENSG00000160293 | 205537_s_at | U133A |
| 1090 Rn30006722 | 0.243 | ENSG00000160293 | 205536_at   | U133A |
| 1090 Rn30006722 | 0.243 | ENSG00000160293 | 205537_s_at | U133A |
| 1092 R000882_01 | 0.243 | ENSG00000137332 | 204795_at   | U133A |
| 1092 R000882_01 | 0.243 | ENSG00000137332 | 200045_at   | U133A |
| 1092 R000882_01 | 0.243 | ENSG00000137332 | 208907_s_at | U133A |
| 1092 R000882_01 | 0.243 | ENSG00000137332 | 217408_at   | U133A |
| 1092 R000882_01 | 0.243 | ENSG00000137332 | 218874_s_at | U133A |
| 1092 R000882_01 | 0.243 | ENSG00000137332 | 217166_at   | U133A |
| 1092 R000882_01 | 0.243 | ENSG00000137332 | 209026_x_at | U133A |
| 1092 R000882_01 | 0.243 | ENSG00000137332 | 211714_x_at | U133A |
| 1092 R000882_01 | 0.243 | ENSG00000137332 | 212320_at   | U133A |
| 1092 R000882_01 | 0.243 | ENSG00000137332 | 213819_s_at | U133A |
| 1092 R000882_01 | 0.243 | ENSG00000137332 | 216679_at   | U133A |
| 1092 R000882_01 | 0.243 | ENSG00000137332 | 208779_x_at | U133A |
| 1092 R000882_01 | 0.243 | ENSG00000137332 | 210749_x_at | U133A |
| 1092 R000882_01 | 0.243 | ENSG00000137332 | 1007_s_at   | U133A |
| 1092 R000882_01 | 0.243 | ENSG00000137332 | 207169_x_at | U133A |
| 1092 R000882_01 | 0.243 | ENSG00000137332 | 208779_x_at | U133A |
| 1092 R000882_01 | 0.243 | ENSG00000137332 | 210749_x_at | U133A |
| 1092 R000882_01 | 0.243 | ENSG00000137332 | 1007_s_at   | U133A |
| 1092 R000882_01 | 0.243 | ENSG00000137332 | 207169_x_at | U133A |
| 1089 Rn30020475 | 0.243 | ENSG00000172663 | 218531_at   | U133A |
| 1086 Rn30017848 | 0.244 | ENSG00000050405 | 217892_s_at | U133A |
| 1088 Rn30000979 | 0.244 | ENSG00000164917 | 209912_s_at | U133A |
| 1088 Rn30000979 | 0.244 | ENSG00000164917 | 209913_x_at | U133A |
| 1088 Rn30000979 | 0.244 | ENSG00000164917 | 209912_s_at | U133A |
| 1088 Rn30000979 | 0.244 | ENSG00000164917 | 209913_x_at | U133A |
| 1085 R002177_01 | 0.245 | ENSG00000086232 | 217735_s_at | U133A |
| 1085 R002177_01 | 0.245 | ENSG00000086232 | 217736_s_at | U133A |
| 1081 Rn30001421 | 0.247 | ENSG00000155313 | 220419_s_at | U133A |
| 1081 Rn30001421 | 0.247 | ENSG00000155313 | 220419_s_at | U133A |
| 1081 Rn30001421 | 0.247 | ENSG00000155313 | 220419_s_at | U133A |
| 1082 Rn30004376 | 0.247 | ENSG00000027075 | 206099_at   | U133A |
| 1082 Rn30004376 | 0.247 | ENSG00000027075 | 218764_at   | U133A |
| 1080 Rn30015331 | 0.247 | ENSG00000198467 | 204083_s_at | U133A |
| 1080 Rn30015331 | 0.247 | ENSG00000198467 | 212654_at   | U133A |
| 1080 Rn30015331 | 0.247 | ENSG00000198467 | 204083_s_at | U133A |
| 1080 Rn30015331 | 0.247 | ENSG00000198467 | 212654_at   | U133A |
| 1078 Rn30015744 | 0.25  | ENSG00000131196 | 208196_x_at | U133A |
| 1078 Rn30015744 | 0.25  | ENSG00000131196 | 209664_x_at | U133A |
| 1078 Rn30015744 | 0.25  | ENSG00000131196 | 210162_s_at | U133A |
| 1078 Rn30015744 | 0.25  | ENSG00000131196 | 211105_s_at | U133A |
| 1078 Rn30015744 | 0.25  | ENSG00000131196 | 208196_x_at | U133A |
| 1078 Rn30015744 | 0.25  | ENSG00000131196 | 209664_x_at | U133A |
| 1078 Rn30015744 | 0.25  | ENSG00000131196 | 210162_s_at | U133A |
| 1078 Rn30015744 | 0.25  | ENSG00000131196 | 211105_s_at | U133A |
| 1078 Rn30015744 | 0.25  | ENSG00000131196 | 208196_x_at | U133A |
| 1078 Rn30015744 | 0.25  | ENSG00000131196 | 209664_x_at | U133A |
| 1078 Rn30015744 | 0.25  | ENSG00000131196 | 210162_s_at | U133A |
| 1078 Rn30015744 | 0.25  | ENSG00000131196 | 211105_s_at | U133A |
| 1074 Rn30009563 | 0.251 | ENSG00000146776 | 214342_at   | U133A |

|                 |       |                 |             |       |
|-----------------|-------|-----------------|-------------|-------|
| 1074 Rn30009563 | 0.251 | ENSG00000146776 | 214343_s_at | U133A |
| 1074 Rn30009563 | 0.251 | ENSG00000146776 | 216144_at   | U133A |
| 1074 Rn30009563 | 0.251 | ENSG00000146776 | 214342_at   | U133A |
| 1074 Rn30009563 | 0.251 | ENSG00000146776 | 214343_s_at | U133A |
| 1074 Rn30009563 | 0.251 | ENSG00000146776 | 214342_at   | U133A |
| 1074 Rn30009563 | 0.251 | ENSG00000146776 | 214343_s_at | U133A |
| 1074 Rn30009563 | 0.251 | ENSG00000146776 | 216144_at   | U133A |
| 1074 Rn30009563 | 0.251 | ENSG00000146776 | 214342_at   | U133A |
| 1074 Rn30009563 | 0.251 | ENSG00000146776 | 214343_s_at | U133A |
| 1076 Rn30002599 | 0.251 | ENSG00000118898 | 203407_at   | U133A |
| 1073 Rn30010415 | 0.252 | ENSG00000053747 | 203726_s_at | U133A |
| 1073 Rn30010415 | 0.252 | ENSG00000053747 | 203726_s_at | U133A |
| 1073 Rn30010415 | 0.252 | ENSG00000053747 | 203726_s_at | U133A |
| 1070 Rn30006692 | 0.254 | ENSG00000100906 | 201502_s_at | U133A |
| 1068 Rn30004718 | 0.255 | ENSG00000176974 | 209980_s_at | U133A |
| 1068 Rn30004718 | 0.255 | ENSG00000176974 | 217304_at   | U133A |
| 1068 Rn30004718 | 0.255 | ENSG00000176974 | 209980_s_at | U133A |
| 1068 Rn30004718 | 0.255 | ENSG00000176974 | 217304_at   | U133A |
| 1068 Rn30004718 | 0.255 | ENSG00000176974 | 209980_s_at | U133A |
| 1068 Rn30004718 | 0.255 | ENSG00000176974 | 217304_at   | U133A |
| 1068 Rn30004718 | 0.255 | ENSG00000176974 | 209980_s_at | U133A |
| 1068 Rn30004718 | 0.255 | ENSG00000176974 | 217304_at   | U133A |
| 1068 Rn30004718 | 0.255 | ENSG00000176974 | 209980_s_at | U133A |
| 1068 Rn30004718 | 0.255 | ENSG00000176974 | 217304_at   | U133A |
| 1066 R005648_01 | 0.256 | ENSG00000107560 | 203883_s_at | U133A |
| 1066 R005648_01 | 0.256 | ENSG00000107560 | 203884_s_at | U133A |
| 1066 R005648_01 | 0.256 | ENSG00000107560 | 203883_s_at | U133A |
| 1066 R005648_01 | 0.256 | ENSG00000107560 | 203884_s_at | U133A |
| 1067 Rn30015754 | 0.256 | ENSG00000071051 | 203315_at   | U133A |
| 1064 Rn30005400 | 0.258 | ENSG00000196878 | 209270_at   | U133A |
| 1064 Rn30005400 | 0.258 | ENSG00000196878 | 209270_at   | U133A |
| 1064 Rn30005400 | 0.258 | ENSG00000196878 | 209270_at   | U133A |
| 1064 Rn30005400 | 0.258 | ENSG00000196878 | 209270_at   | U133A |
| 1063 Rn30014253 | 0.26  | ENSG00000096968 | 205841_at   | U133A |
| 1063 Rn30014253 | 0.26  | ENSG00000096968 | 205842_s_at | U133A |
| 1063 Rn30014253 | 0.26  | ENSG00000096968 | 205841_at   | U133A |
| 1063 Rn30014253 | 0.26  | ENSG00000096968 | 205842_s_at | U133A |
| 1058 R001079_01 | 0.265 | ENSG00000115488 | 221368_at   | U133A |
| 1055 R000557_01 | 0.266 | ENSG00000106211 | 201841_s_at | U133A |
| 1052 R005646_01 | 0.269 | ENSG00000141425 | 218209_s_at | U133A |
| 1052 R005646_01 | 0.269 | ENSG00000141425 | 218209_s_at | U133A |
| 1052 R005646_01 | 0.269 | ENSG00000141425 | 218209_s_at | U133A |
| 1052 R005646_01 | 0.269 | ENSG00000141425 | 218209_s_at | U133A |
| 1049 Rn30025834 | 0.27  | ENSG00000034510 | 217733_s_at | U133A |
| 1048 Rn30001174 | 0.27  | ENSG00000164818 | 218460_at   | U133A |
| 1048 Rn30001174 | 0.27  | ENSG00000164818 | 218460_at   | U133A |
| 1048 Rn30001174 | 0.27  | ENSG00000164818 | 218460_at   | U133A |
| 1048 Rn30001174 | 0.27  | ENSG00000164818 | 218460_at   | U133A |
| 1048 Rn30001174 | 0.27  | ENSG00000164818 | 218460_at   | U133A |
| 1048 Rn30001174 | 0.27  | ENSG00000164818 | 218460_at   | U133A |
| 1046 Rn30001985 | 0.271 | ENSG00000173083 | 219403_s_at | U133A |
| 1046 Rn30001985 | 0.271 | ENSG00000173083 | 219403_s_at | U133A |
| 1040 Rn30013867 | 0.272 | ENSG00000103381 | 218610_s_at | U133A |
| 1040 Rn30013867 | 0.272 | ENSG00000103381 | 218610_s_at | U133A |
| 1044 Rn30011684 | 0.272 | ENSG00000156675 | 219681_s_at | U133A |



|                 |       |                 |             |       |
|-----------------|-------|-----------------|-------------|-------|
| 1044 Rn30011684 | 0.272 | ENSG00000156675 | 219681_s_at | U133A |
| 1044 Rn30011684 | 0.272 | ENSG00000156675 | 219681_s_at | U133A |
| 1044 Rn30011684 | 0.272 | ENSG00000156675 | 219681_s_at | U133A |
| 1043 Rn30015390 | 0.272 | ENSG00000110721 | 204233_s_at | U133A |
| 1043 Rn30015390 | 0.272 | ENSG00000110721 | 204266_s_at | U133A |
| 1043 Rn30015390 | 0.272 | ENSG00000110721 | 204233_s_at | U133A |
| 1043 Rn30015390 | 0.272 | ENSG00000110721 | 204266_s_at | U133A |
| 1042 Rn30018047 | 0.272 | ENSG00000129219 | 209643_s_at | U133A |
| 1039 Rn30017891 | 0.273 | ENSG00000092098 | 220788_s_at | U133A |
| 1039 Rn30017891 | 0.273 | ENSG00000092098 | 220788_s_at | U133A |
| 1039 Rn30017891 | 0.273 | ENSG00000092098 | 203882_at   | U133A |
| 1037 Rn30006066 | 0.274 | ENSG00000104341 | 208029_s_at | U133A |
| 1037 Rn30006066 | 0.274 | ENSG00000104341 | 208767_s_at | U133A |
| 1037 Rn30006066 | 0.274 | ENSG00000104341 | 208029_s_at | U133A |
| 1037 Rn30006066 | 0.274 | ENSG00000104341 | 208767_s_at | U133A |
| 1036 Rn30022798 | 0.276 | ENSG00000182095 | 214964_at   | U133A |
| 1036 Rn30022798 | 0.276 | ENSG00000182095 | 214964_at   | U133A |
| 1036 Rn30022798 | 0.276 | ENSG00000182095 | 214964_at   | U133A |
| 1036 Rn30022798 | 0.276 | ENSG00000182095 | 214964_at   | U133A |
| 1032 Rn30015938 | 0.278 | ENSG00000035664 | 206324_s_at | U133A |
| 1032 Rn30015938 | 0.278 | ENSG00000035664 | 215184_at   | U133A |
| 1033 Rn30021084 | 0.278 | ENSG00000126778 | 205817_at   | U133A |
| 1027 Rn30018923 | 0.283 | ENSG00000186111 | 212518_at   | U133A |
| 1026 R000334_01 | 0.283 | ENSG00000175898 | 208537_at   | U133A |
| 1025 Rn30015167 | 0.284 | ENSG00000079691 | 219573_at   | U133A |
| 1025 Rn30015167 | 0.284 | ENSG00000079691 | 220913_at   | U133A |
| 1025 Rn30015167 | 0.284 | ENSG00000079691 | 219573_at   | U133A |
| 1025 Rn30015167 | 0.284 | ENSG00000079691 | 220913_at   | U133A |
| 1024 Rn30015819 | 0.284 | ENSG00000110719 | 204158_s_at | U133A |
| 1022 Rn30003556 | 0.285 | ENSG00000119720 | 221231_s_at | U133A |
| 1022 Rn30003556 | 0.285 | ENSG00000119720 | 221231_s_at | U133A |
| 1022 Rn30003556 | 0.285 | ENSG00000119720 | 221231_s_at | U133A |
| 1021 Rn30017062 | 0.286 | ENSG00000074356 | 218896_s_at | U133A |
| 1021 Rn30017062 | 0.286 | ENSG00000074356 | 218896_s_at | U133A |
| 1016 Rn30013444 | 0.288 | ENSG00000166407 | 206718_at   | U133A |
| 1016 Rn30013444 | 0.288 | ENSG00000166407 | 206718_at   | U133A |
| 1019 R002761_01 | 0.288 | ENSG00000069493 | 220132_s_at | U133A |
| 1019 R002761_01 | 0.288 | ENSG00000069493 | 220132_s_at | U133A |
| 1019 R002761_01 | 0.288 | ENSG00000069493 | 220132_s_at | U133A |
| 1017 R004809_01 | 0.288 | ENSG00000198517 | 206750_at   | U133A |
| 1015 Rn30003555 | 0.29  | ENSG00000143507 | 221563_at   | U133A |
| 1015 Rn30003555 | 0.29  | ENSG00000143507 | 215501_s_at | U133A |
| 1015 Rn30003555 | 0.29  | ENSG00000143507 | 221563_at   | U133A |
| 1015 Rn30003555 | 0.29  | ENSG00000143507 | 215501_s_at | U133A |
| 1011 Rn30020311 | 0.291 | ENSG00000161326 | 203367_at   | U133A |
| 1012 Rn30005626 | 0.291 | ENSG00000134294 | 218041_x_at | U133A |
| 1012 Rn30005626 | 0.291 | ENSG00000134294 | 220924_s_at | U133A |
| 1012 Rn30005626 | 0.291 | ENSG00000134294 | 218041_x_at | U133A |
| 1012 Rn30005626 | 0.291 | ENSG00000134294 | 220924_s_at | U133A |
| 1009 Rn30018247 | 0.293 | ENSG00000099860 | 209304_x_at | U133A |
| 1009 Rn30018247 | 0.293 | ENSG00000099860 | 207574_s_at | U133A |
| 1009 Rn30018247 | 0.293 | ENSG00000099860 | 209305_s_at | U133A |
| 1007 Rn30004804 | 0.294 | ENSG00000100417 | 203467_at   | U133A |

|                 |       |                 |             |       |
|-----------------|-------|-----------------|-------------|-------|
| 1005 Rn30018936 | 0.295 | ENSG00000175602 | 204609_at   | U133A |
| 1005 Rn30018936 | 0.295 | ENSG00000175602 | 204610_s_at | U133A |
| 1002 Rn30006296 | 0.297 | ENSG00000120798 | 204791_at   | U133A |
| 1002 Rn30006296 | 0.297 | ENSG00000120798 | 210530_s_at | U133A |
| 1002 Rn30006296 | 0.297 | ENSG00000120798 | 210531_at   | U133A |
| 1002 Rn30006296 | 0.297 | ENSG00000120798 | 204791_at   | U133A |
| 1002 Rn30006296 | 0.297 | ENSG00000120798 | 210530_s_at | U133A |
| 1002 Rn30006296 | 0.297 | ENSG00000120798 | 210531_at   | U133A |
| 1002 Rn30006296 | 0.297 | ENSG00000120798 | 204791_at   | U133A |
| 1002 Rn30006296 | 0.297 | ENSG00000120798 | 210530_s_at | U133A |
| 1002 Rn30006296 | 0.297 | ENSG00000120798 | 210531_at   | U133A |
| 1002 Rn30006296 | 0.297 | ENSG00000120798 | 204791_at   | U133A |
| 1002 Rn30006296 | 0.297 | ENSG00000120798 | 210530_s_at | U133A |
| 1002 Rn30006296 | 0.297 | ENSG00000120798 | 210531_at   | U133A |
| 1002 Rn30006296 | 0.297 | ENSG00000120798 | 204791_at   | U133A |
| 1002 Rn30006296 | 0.297 | ENSG00000120798 | 210530_s_at | U133A |
| 1002 Rn30006296 | 0.297 | ENSG00000120798 | 210531_at   | U133A |
| 1002 Rn30006296 | 0.297 | ENSG00000120798 | 204791_at   | U133A |
| 1002 Rn30006296 | 0.297 | ENSG00000120798 | 210530_s_at | U133A |
| 1002 Rn30006296 | 0.297 | ENSG00000120798 | 210531_at   | U133A |
| 1003 R003665_01 | 0.297 | ENSG00000078053 | 205257_s_at | U133A |
| 1003 R003665_01 | 0.297 | ENSG00000078053 | 205257_s_at | U133A |
| 1003 R003665_01 | 0.297 | ENSG00000078053 | 205257_s_at | U133A |
| 1003 R003665_01 | 0.297 | ENSG00000078053 | 205257_s_at | U133A |
| 1003 R003665_01 | 0.297 | ENSG00000078053 | 205257_s_at | U133A |
| 1003 R003665_01 | 0.297 | ENSG00000078053 | 205257_s_at | U133A |
| 999 Rn30016380  | 0.298 | ENSG00000188690 | 203031_s_at | U133A |
| 1001 Rn30010099 | 0.298 | ENSG00000106993 | 219343_at   | U133A |
| 1000 Rn30012111 | 0.298 | ENSG00000153815 | 220809_at   | U133A |
| 1000 Rn30012111 | 0.298 | ENSG00000153815 | 220809_at   | U133A |
| 997 Rn30002709  | 0.3   | ENSG00000184197 | 214838_at   | U133A |
| 998 Rn30010459  | 0.3   | ENSG00000024422 | 205341_at   | U133A |
| 998 Rn30010459  | 0.3   | ENSG00000024422 | 45297_at    | U133A |
| 996 Rn30001064  | 0.301 | ENSG00000139433 | 219267_at   | U133A |
| 995 R004525_01  | 0.302 | ENSG00000168396 | 209040_s_at | U133A |
| 995 R004525_01  | 0.302 | ENSG00000168396 | 209040_s_at | U133A |
| 993 Rn30018969  | 0.305 | ENSG00000007384 | 218686_s_at | U133A |
| 993 Rn30018969  | 0.305 | ENSG00000007384 | 218686_s_at | U133A |
| 991 R003216_01  | 0.306 | ENSG00000186350 | 202426_s_at | U133A |
| 991 R003216_01  | 0.306 | ENSG00000186350 | 202449_s_at | U133A |
| 989 Rn30012562  | 0.308 | ENSG00000042493 | 201850_at   | U133A |
| 987 Rn30009171  | 0.31  | ENSG00000158987 | 219112_at   | U133A |
| 987 Rn30009171  | 0.31  | ENSG00000158987 | 219112_at   | U133A |
| 987 Rn30009171  | 0.31  | ENSG00000158987 | 219112_at   | U133A |
| 987 Rn30009171  | 0.31  | ENSG00000158987 | 219112_at   | U133A |
| 987 Rn30009171  | 0.31  | ENSG00000158987 | 219112_at   | U133A |
| 987 Rn30009171  | 0.31  | ENSG00000158987 | 219112_at   | U133A |
| 987 Rn30009171  | 0.31  | ENSG00000158987 | 219112_at   | U133A |
| 987 Rn30009171  | 0.31  | ENSG00000158987 | 219112_at   | U133A |
| 986 Rn30016668  | 0.312 | ENSG00000089876 | 218198_at   | U133A |
| 986 Rn30016668  | 0.312 | ENSG00000089876 | 218198_at   | U133A |
| 986 Rn30016668  | 0.312 | ENSG00000089876 | 218198_at   | U133A |
| 984 Rn30021015  | 0.313 | ENSG00000135378 | 207291_at   | U133A |
| 982 Rn30011717  | 0.315 | ENSG00000125534 | 218010_x_at | U133A |

|                |       |                 |             |       |
|----------------|-------|-----------------|-------------|-------|
| 981 Rn30018044 | 0.315 | ENSG00000102882 | 210396_s_at | U133A |
| 981 Rn30018044 | 0.315 | ENSG00000102882 | 212046_x_at | U133A |
| 981 Rn30018044 | 0.315 | ENSG00000102882 | 210396_s_at | U133A |
| 981 Rn30018044 | 0.315 | ENSG00000102882 | 212046_x_at | U133A |
| 978 Rn30006408 | 0.316 | ENSG00000158125 | 210301_at   | U133A |
| 977 Rn30015714 | 0.316 | ENSG00000078269 | 210612_s_at | U133A |
| 977 Rn30015714 | 0.316 | ENSG00000078269 | 212828_at   | U133A |
| 977 Rn30015714 | 0.316 | ENSG00000078269 | 216180_s_at | U133A |
| 977 Rn30015714 | 0.316 | ENSG00000078269 | 216181_at   | U133A |
| 977 Rn30015714 | 0.316 | ENSG00000078269 | 210612_s_at | U133A |
| 977 Rn30015714 | 0.316 | ENSG00000078269 | 212828_at   | U133A |
| 977 Rn30015714 | 0.316 | ENSG00000078269 | 216180_s_at | U133A |
| 977 Rn30015714 | 0.316 | ENSG00000078269 | 216181_at   | U133A |
| 973 Rn30000695 | 0.317 | ENSG00000135968 | 202832_at   | U133A |
| 973 Rn30000695 | 0.317 | ENSG00000135968 | 202832_at   | U133A |
| 976 Rn30009267 | 0.317 | ENSG00000129116 | 200897_s_at | U133A |
| 976 Rn30009267 | 0.317 | ENSG00000129116 | 200906_s_at | U133A |
| 976 Rn30009267 | 0.317 | ENSG00000129116 | 200907_s_at | U133A |
| 976 Rn30009267 | 0.317 | ENSG00000129116 | 200897_s_at | U133A |
| 976 Rn30009267 | 0.317 | ENSG00000129116 | 200906_s_at | U133A |
| 976 Rn30009267 | 0.317 | ENSG00000129116 | 200907_s_at | U133A |
| 976 Rn30009267 | 0.317 | ENSG00000129116 | 200897_s_at | U133A |
| 976 Rn30009267 | 0.317 | ENSG00000129116 | 200906_s_at | U133A |
| 976 Rn30009267 | 0.317 | ENSG00000129116 | 200907_s_at | U133A |
| 976 Rn30009267 | 0.317 | ENSG00000129116 | 200897_s_at | U133A |
| 976 Rn30009267 | 0.317 | ENSG00000129116 | 200906_s_at | U133A |
| 976 Rn30009267 | 0.317 | ENSG00000129116 | 200907_s_at | U133A |
| 976 Rn30009267 | 0.317 | ENSG00000129116 | 200897_s_at | U133A |
| 976 Rn30009267 | 0.317 | ENSG00000129116 | 200906_s_at | U133A |
| 976 Rn30009267 | 0.317 | ENSG00000129116 | 200907_s_at | U133A |
| 975 Rn30010288 | 0.317 | ENSG00000166002 | 219806_s_at | U133A |
| 969 Rn30019701 | 0.319 | ENSG00000006118 | 218834_s_at | U133A |
| 969 Rn30019701 | 0.319 | ENSG00000006118 | 218834_s_at | U133A |
| 969 Rn30019701 | 0.319 | ENSG00000006118 | 218834_s_at | U133A |
| 970 R003997_01 | 0.319 | ENSG00000167193 | 214656_x_at | U133A |
| 970 R003997_01 | 0.319 | ENSG00000167193 | 202224_at   | U133A |
| 970 R003997_01 | 0.319 | ENSG00000167193 | 202225_at   | U133A |
| 970 R003997_01 | 0.319 | ENSG00000167193 | 202226_s_at | U133A |
| 970 R003997_01 | 0.319 | ENSG00000167193 | 214656_x_at | U133A |
| 970 R003997_01 | 0.319 | ENSG00000167193 | 202224_at   | U133A |
| 970 R003997_01 | 0.319 | ENSG00000167193 | 202225_at   | U133A |
| 970 R003997_01 | 0.319 | ENSG00000167193 | 202226_s_at | U133A |
| 967 Rn30002858 | 0.32  | ENSG00000198265 | 203674_at   | U133A |
| 966 R005185_01 | 0.32  | ENSG00000065883 | 207318_s_at | U133A |
| 966 R005185_01 | 0.32  | ENSG00000065883 | 207319_s_at | U133A |
| 966 R005185_01 | 0.32  | ENSG00000065883 | 210965_x_at | U133A |
| 966 R005185_01 | 0.32  | ENSG00000065883 | 207318_s_at | U133A |
| 966 R005185_01 | 0.32  | ENSG00000065883 | 207319_s_at | U133A |
| 966 R005185_01 | 0.32  | ENSG00000065883 | 210965_x_at | U133A |
| 966 R005185_01 | 0.32  | ENSG00000065883 | 207318_s_at | U133A |
| 966 R005185_01 | 0.32  | ENSG00000065883 | 207319_s_at | U133A |
| 966 R005185_01 | 0.32  | ENSG00000065883 | 210965_x_at | U133A |
| 966 R005185_01 | 0.32  | ENSG00000065883 | 207318_s_at | U133A |
| 966 R005185_01 | 0.32  | ENSG00000065883 | 207319_s_at | U133A |
| 966 R005185_01 | 0.32  | ENSG00000065883 | 210965_x_at | U133A |
| 965 Rn30012821 | 0.323 | ENSG00000086544 | 213076_at   | U133A |

|                |                       |             |       |
|----------------|-----------------------|-------------|-------|
| 962 Rn30017943 | 0.325 ENSG00000146476 | 218195_at   | U133A |
| 962 Rn30017943 | 0.325 ENSG00000146476 | 218195_at   | U133A |
| 958 R001676_01 | 0.326 ENSG00000146535 | 221737_at   | U133A |
| 958 R001676_01 | 0.326 ENSG00000146535 | 221737_at   | U133A |
| 960 Rn30002422 | 0.326 ENSG00000119541 | 218171_at   | U133A |
| 959 Rn30006928 | 0.326 ENSG00000079805 | 202253_s_at | U133A |
| 959 Rn30006928 | 0.326 ENSG00000079805 | 202253_s_at | U133A |
| 959 Rn30006928 | 0.326 ENSG00000079805 | 202253_s_at | U133A |
| 957 Rn30007873 | 0.327 ENSG00000120549 | 214912_at   | U133A |
| 955 Rn30008273 | 0.33 ENSG00000166056  | 209671_x_at | U133A |
| 955 Rn30008273 | 0.33 ENSG00000166056  | 209670_at   | U133A |
| 955 Rn30008273 | 0.33 ENSG00000166056  | 215796_at   | U133A |
| 955 Rn30008273 | 0.33 ENSG00000166056  | 217412_at   | U133A |
| 955 Rn30008273 | 0.33 ENSG00000166056  | 216133_at   | U133A |
| 955 Rn30008273 | 0.33 ENSG00000166056  | 217143_s_at | U133A |
| 955 Rn30008273 | 0.33 ENSG00000166056  | 215540_at   | U133A |
| 955 Rn30008273 | 0.33 ENSG00000166056  | 210972_x_at | U133A |
| 955 Rn30008273 | 0.33 ENSG00000166056  | 217056_at   | U133A |
| 955 Rn30008273 | 0.33 ENSG00000166056  | 215524_x_at | U133A |
| 955 Rn30008273 | 0.33 ENSG00000166056  | 211902_x_at | U133A |
| 955 Rn30008273 | 0.33 ENSG00000166056  | 216191_s_at | U133A |
| 955 Rn30008273 | 0.33 ENSG00000166056  | 213830_at   | U133A |
| 955 Rn30008273 | 0.33 ENSG00000166056  | 209671_x_at | U133A |
| 955 Rn30008273 | 0.33 ENSG00000166056  | 209670_at   | U133A |
| 955 Rn30008273 | 0.33 ENSG00000166056  | 215796_at   | U133A |
| 955 Rn30008273 | 0.33 ENSG00000166056  | 217412_at   | U133A |
| 955 Rn30008273 | 0.33 ENSG00000166056  | 216133_at   | U133A |
| 955 Rn30008273 | 0.33 ENSG00000166056  | 217143_s_at | U133A |
| 955 Rn30008273 | 0.33 ENSG00000166056  | 215540_at   | U133A |
| 955 Rn30008273 | 0.33 ENSG00000166056  | 210972_x_at | U133A |
| 955 Rn30008273 | 0.33 ENSG00000166056  | 217056_at   | U133A |
| 955 Rn30008273 | 0.33 ENSG00000166056  | 215524_x_at | U133A |
| 955 Rn30008273 | 0.33 ENSG00000166056  | 211902_x_at | U133A |
| 955 Rn30008273 | 0.33 ENSG00000166056  | 216191_s_at | U133A |
| 955 Rn30008273 | 0.33 ENSG00000166056  | 213830_at   | U133A |
| 953 Rn30003300 | 0.332 ENSG00000162073 | 212858_at   | U133A |
| 953 Rn30003300 | 0.332 ENSG00000162073 | 212858_at   | U133A |
| 951 R002103_01 | 0.333 ENSG00000134086 | 203844_at   | U133A |
| 951 R002103_01 | 0.333 ENSG00000134086 | 203844_at   | U133A |
| 952 Rn30010927 | 0.333 ENSG00000114166 | 203845_at   | U133A |
| 948 Rn30013951 | 0.334 ENSG00000155324 | 218706_s_at | U133A |
| 947 Rn30019556 | 0.334 ENSG00000072518 | 203942_s_at | U133A |
| 947 Rn30019556 | 0.334 ENSG00000072518 | 211082_x_at | U133A |
| 947 Rn30019556 | 0.334 ENSG00000072518 | 203942_s_at | U133A |
| 947 Rn30019556 | 0.334 ENSG00000072518 | 211082_x_at | U133A |
| 947 Rn30019556 | 0.334 ENSG00000072518 | 203942_s_at | U133A |
| 947 Rn30019556 | 0.334 ENSG00000072518 | 211082_x_at | U133A |
| 949 Rn30001731 | 0.334 ENSG00000093010 | 208817_at   | U133A |
| 949 Rn30001731 | 0.334 ENSG00000093010 | 208818_s_at | U133A |
| 949 Rn30001731 | 0.334 ENSG00000093010 | 213981_at   | U133A |
| 946 Rn30001558 | 0.336 ENSG00000114315 | 203393_at   | U133A |
| 946 Rn30001558 | 0.336 ENSG00000114315 | 203394_s_at | U133A |
| 946 Rn30001558 | 0.336 ENSG00000114315 | 203395_s_at | U133A |

|                |       |                 |             |       |
|----------------|-------|-----------------|-------------|-------|
| 945 Rn30013110 | 0.336 | ENSG00000107331 | 210100_s_at | U133A |
| 945 Rn30013110 | 0.336 | ENSG00000107331 | 212772_s_at | U133A |
| 945 Rn30013110 | 0.336 | ENSG00000107331 | 210100_s_at | U133A |
| 945 Rn30013110 | 0.336 | ENSG00000107331 | 212772_s_at | U133A |
| 945 Rn30013110 | 0.336 | ENSG00000107331 | 210100_s_at | U133A |
| 945 Rn30013110 | 0.336 | ENSG00000107331 | 212772_s_at | U133A |
| 944 Rn30000551 | 0.336 | ENSG00000128294 | 204079_at   | U133A |
| 942 Rn30019314 | 0.337 | ENSG00000087074 | 202014_at   | U133A |
| 942 Rn30019314 | 0.337 | ENSG00000087074 | 37028_at    | U133A |
| 943 Rn30001129 | 0.337 | ENSG00000106268 | 204766_s_at | U133A |
| 943 Rn30001129 | 0.337 | ENSG00000106268 | 204766_s_at | U133A |
| 943 Rn30001129 | 0.337 | ENSG00000106268 | 204766_s_at | U133A |
| 941 Rn30010146 | 0.338 | ENSG00000010818 | 212641_at   | U133A |
| 941 Rn30010146 | 0.338 | ENSG00000010818 | 212642_s_at | U133A |
| 938 Rn30007013 | 0.339 | ENSG00000167695 | 218898_at   | U133A |
| 938 Rn30007013 | 0.339 | ENSG00000167695 | 218898_at   | U133A |
| 939 Rn30000917 | 0.339 | ENSG00000106305 | 202138_x_at | U133A |
| 939 Rn30000917 | 0.339 | ENSG00000106305 | 209971_x_at | U133A |
| 939 Rn30000917 | 0.339 | ENSG00000106305 | 209972_s_at | U133A |
| 937 Rn30001730 | 0.339 | ENSG00000099889 | 217516_x_at | U133A |
| 937 Rn30001730 | 0.339 | ENSG00000099889 | 205784_x_at | U133A |
| 937 Rn30001730 | 0.339 | ENSG00000099889 | 216204_at   | U133A |
| 937 Rn30001730 | 0.339 | ENSG00000099889 | 205784_x_at | U133A |
| 934 Rn30004511 | 0.34  | ENSG00000075391 | 217201_at   | U133A |
| 934 Rn30004511 | 0.34  | ENSG00000075391 | 219026_s_at | U133A |
| 934 Rn30004511 | 0.34  | ENSG00000075391 | 217201_at   | U133A |
| 934 Rn30004511 | 0.34  | ENSG00000075391 | 219026_s_at | U133A |
| 931 Rn30013586 | 0.341 | ENSG00000135926 | 217730_at   | U133A |
| 929 Rn30000534 | 0.341 | ENSG00000171988 | 221763_at   | U133A |
| 929 Rn30000534 | 0.341 | ENSG00000171988 | 221763_at   | U133A |
| 929 Rn30000534 | 0.341 | ENSG00000171988 | 221763_at   | U133A |
| 932 Rn30009524 | 0.341 | ENSG00000145901 | 207196_s_at | U133A |
| 932 Rn30009524 | 0.341 | ENSG00000145901 | 207196_s_at | U133A |
| 926 Rn30013725 | 0.342 | ENSG00000102753 | 221502_at   | U133A |
| 926 Rn30013725 | 0.342 | ENSG00000102753 | 221503_s_at | U133A |
| 927 Rn30018470 | 0.342 | ENSG00000169136 | 204998_s_at | U133A |
| 927 Rn30018470 | 0.342 | ENSG00000169136 | 204999_s_at | U133A |
| 925 Rn30014552 | 0.343 | ENSG00000162337 | 209468_at   | U133A |
| 923 Rn30010935 | 0.345 | ENSG00000102743 | 218653_at   | U133A |
| 921 R002899_01 | 0.347 | ENSG00000119314 | 207223_s_at | U133A |
| 921 R002899_01 | 0.347 | ENSG00000119314 | 214697_s_at | U133A |
| 921 R002899_01 | 0.347 | ENSG00000119314 | 214698_at   | U133A |
| 921 R002899_01 | 0.347 | ENSG00000119314 | 207223_s_at | U133A |
| 921 R002899_01 | 0.347 | ENSG00000119314 | 214697_s_at | U133A |
| 921 R002899_01 | 0.347 | ENSG00000119314 | 214698_at   | U133A |
| 921 R002899_01 | 0.347 | ENSG00000119314 | 207223_s_at | U133A |
| 921 R002899_01 | 0.347 | ENSG00000119314 | 214697_s_at | U133A |
| 921 R002899_01 | 0.347 | ENSG00000119314 | 214698_at   | U133A |
| 920 Rn30000963 | 0.348 | ENSG00000136247 | 220261_s_at | U133A |
| 920 Rn30000963 | 0.348 | ENSG00000136247 | 220261_s_at | U133A |
| 919 Rn30000782 | 0.348 | ENSG00000122042 | 201535_at   | U133A |
| 919 Rn30000782 | 0.348 | ENSG00000122042 | 201534_s_at | U133A |
| 918 Rn30016859 | 0.349 | ENSG00000177106 | 218180_s_at | U133A |

|                |       |                 |             |       |
|----------------|-------|-----------------|-------------|-------|
| 918 Rn30016859 | 0.349 | ENSG00000177106 | 218180_s_at | U133A |
| 917 Rn30018834 | 0.35  | ENSG00000138162 | 202289_s_at | U133A |
| 917 Rn30018834 | 0.35  | ENSG00000138162 | 211382_s_at | U133A |
| 917 Rn30018834 | 0.35  | ENSG00000138162 | 202289_s_at | U133A |
| 917 Rn30018834 | 0.35  | ENSG00000138162 | 211382_s_at | U133A |
| 917 Rn30018834 | 0.35  | ENSG00000138162 | 202289_s_at | U133A |
| 917 Rn30018834 | 0.35  | ENSG00000138162 | 211382_s_at | U133A |
| 917 Rn30018834 | 0.35  | ENSG00000138162 | 202289_s_at | U133A |
| 917 Rn30018834 | 0.35  | ENSG00000138162 | 211382_s_at | U133A |
| 917 Rn30018834 | 0.35  | ENSG00000138162 | 202289_s_at | U133A |
| 917 Rn30018834 | 0.35  | ENSG00000138162 | 211382_s_at | U133A |
| 916 Rn30017168 | 0.351 | ENSG00000105639 | 214400_at   | U133A |
| 916 Rn30017168 | 0.351 | ENSG00000105639 | 214572_s_at | U133A |
| 916 Rn30017168 | 0.351 | ENSG00000105639 | 214400_at   | U133A |
| 916 Rn30017168 | 0.351 | ENSG00000105639 | 214572_s_at | U133A |
| 916 Rn30017168 | 0.351 | ENSG00000105639 | 207187_at   | U133A |
| 916 Rn30017168 | 0.351 | ENSG00000105639 | 211108_s_at | U133A |
| 916 Rn30017168 | 0.351 | ENSG00000105639 | 211109_at   | U133A |
| 914 Rn30014071 | 0.351 | ENSG00000196700 | 219568_x_at | U133A |
| 914 Rn30014071 | 0.351 | ENSG00000196700 | 221869_at   | U133A |
| 914 Rn30014071 | 0.351 | ENSG00000196700 | 55872_at    | U133A |
| 914 Rn30014071 | 0.351 | ENSG00000196700 | 216138_at   | U133A |
| 914 Rn30014071 | 0.351 | ENSG00000196700 | 219568_x_at | U133A |
| 914 Rn30014071 | 0.351 | ENSG00000196700 | 219568_x_at | U133A |
| 912 R000209_01 | 0.352 | ENSG00000135046 | 201012_at   | U133A |
| 913 Rn30013610 | 0.352 | ENSG00000116731 | 205277_at   | U133A |
| 913 Rn30013610 | 0.352 | ENSG00000116731 | 203056_s_at | U133A |
| 913 Rn30013610 | 0.352 | ENSG00000116731 | 203057_s_at | U133A |
| 913 Rn30013610 | 0.352 | ENSG00000116731 | 216433_s_at | U133A |
| 913 Rn30013610 | 0.352 | ENSG00000116731 | 205277_at   | U133A |
| 913 Rn30013610 | 0.352 | ENSG00000116731 | 203056_s_at | U133A |
| 913 Rn30013610 | 0.352 | ENSG00000116731 | 203057_s_at | U133A |
| 913 Rn30013610 | 0.352 | ENSG00000116731 | 216433_s_at | U133A |
| 913 Rn30013610 | 0.352 | ENSG00000116731 | 205277_at   | U133A |
| 913 Rn30013610 | 0.352 | ENSG00000116731 | 203056_s_at | U133A |
| 913 Rn30013610 | 0.352 | ENSG00000116731 | 203057_s_at | U133A |
| 913 Rn30013610 | 0.352 | ENSG00000116731 | 216433_s_at | U133A |
| 910 Rn30002203 | 0.353 | ENSG00000144118 | 202100_at   | U133A |
| 910 Rn30002203 | 0.353 | ENSG00000144118 | 202101_s_at | U133A |
| 906 Rn30009773 | 0.357 | ENSG00000188566 | 219899_x_at | U133A |
| 906 Rn30009773 | 0.357 | ENSG00000188566 | 219899_x_at | U133A |
| 905 Rn30017606 | 0.358 | ENSG00000143641 | 217787_s_at | U133A |
| 905 Rn30017606 | 0.358 | ENSG00000143641 | 217788_s_at | U133A |
| 902 Rn30004234 | 0.361 | ENSG00000134138 | 207480_s_at | U133A |
| 902 Rn30004234 | 0.361 | ENSG00000134138 | 207480_s_at | U133A |
| 902 Rn30004234 | 0.361 | ENSG00000134138 | 207480_s_at | U133A |
| 902 Rn30004234 | 0.361 | ENSG00000134138 | 207480_s_at | U133A |
| 900 Rn30000429 | 0.361 | ENSG00000137409 | 221619_s_at | U133A |
| 900 Rn30000429 | 0.361 | ENSG00000137409 | 221619_s_at | U133A |
| 900 Rn30000429 | 0.361 | ENSG00000137409 | 221619_s_at | U133A |
| 900 Rn30000429 | 0.361 | ENSG00000137409 | 221619_s_at | U133A |
| 901 Rn30023603 | 0.361 | ENSG00000049860 | 201944_at   | U133A |
| 898 Rn30016660 | 0.362 | ENSG00000197321 | 202565_s_at | U133A |

|                |       |                 |             |       |
|----------------|-------|-----------------|-------------|-------|
| 898 Rn30016660 | 0.362 | ENSG00000197321 | 202566_s_at | U133A |
| 898 Rn30016660 | 0.362 | ENSG00000197321 | 202565_s_at | U133A |
| 898 Rn30016660 | 0.362 | ENSG00000197321 | 202566_s_at | U133A |
| 896 Rn30014809 | 0.363 | ENSG00000185722 | 219868_s_at | U133A |
| 896 Rn30014809 | 0.363 | ENSG00000185722 | 219868_s_at | U133A |
| 894 Rn30012618 | 0.363 | ENSG00000106624 | 201792_at   | U133A |
| 895 Rn30025213 | 0.363 | ENSG00000019144 | 212134_at   | U133A |
| 895 Rn30025213 | 0.363 | ENSG00000019144 | 216019_x_at | U133A |
| 895 Rn30025213 | 0.363 | ENSG00000019144 | 212134_at   | U133A |
| 895 Rn30025213 | 0.363 | ENSG00000019144 | 216019_x_at | U133A |
| 895 Rn30025213 | 0.363 | ENSG00000019144 | 212134_at   | U133A |
| 890 Rn30009043 | 0.365 | ENSG00000123739 | 221027_s_at | U133A |
| 891 R003274_01 | 0.365 | ENSG00000161267 | 211715_s_at | U133A |
| 891 R003274_01 | 0.365 | ENSG00000161267 | 211715_s_at | U133A |
| 891 R003274_01 | 0.365 | ENSG00000161267 | 211715_s_at | U133A |
| 892 R005110_01 | 0.365 | ENSG00000101624 | 52285_f_at  | U133A |
| 892 R005110_01 | 0.365 | ENSG00000101624 | 219311_at   | U133A |
| 889 Rn30013636 | 0.366 | ENSG00000142867 | 205263_at   | U133A |
| 889 Rn30013636 | 0.366 | ENSG00000142867 | 205263_at   | U133A |
| 888 Rn30017065 | 0.366 | ENSG00000110697 | 203826_s_at | U133A |
| 888 Rn30017065 | 0.366 | ENSG00000110697 | 203826_s_at | U133A |
| 886 Rn30004582 | 0.368 | ENSG00000108469 | 210309_at   | U133A |
| 886 Rn30004582 | 0.368 | ENSG00000108469 | 211468_s_at | U133A |
| 886 Rn30004582 | 0.368 | ENSG00000108469 | 221686_s_at | U133A |
| 886 Rn30004582 | 0.368 | ENSG00000108469 | 210309_at   | U133A |
| 886 Rn30004582 | 0.368 | ENSG00000108469 | 211468_s_at | U133A |
| 883 R004417_01 | 0.368 | ENSG00000124356 | 202811_at   | U133A |
| 883 R004417_01 | 0.368 | ENSG00000124356 | 202811_at   | U133A |
| 883 R004417_01 | 0.368 | ENSG00000124356 | 202811_at   | U133A |
| 885 Rn30017609 | 0.368 | ENSG00000173120 | 208987_s_at | U133A |
| 885 Rn30017609 | 0.368 | ENSG00000173120 | 208988_at   | U133A |
| 885 Rn30017609 | 0.368 | ENSG00000173120 | 208989_s_at | U133A |
| 885 Rn30017609 | 0.368 | ENSG00000173120 | 215191_at   | U133A |
| 881 Rn30014638 | 0.37  | ENSG00000167136 | 204824_at   | U133A |
| 882 Rn30014838 | 0.37  | ENSG00000171208 | 218888_s_at | U133A |
| 879 Rn30016229 | 0.373 | ENSG00000040933 | 204552_at   | U133A |
| 879 Rn30016229 | 0.373 | ENSG00000040933 | 204553_x_at | U133A |
| 879 Rn30016229 | 0.373 | ENSG00000040933 | 207261_at   | U133A |
| 879 Rn30016229 | 0.373 | ENSG00000040933 | 208363_s_at | U133A |
| 879 Rn30016229 | 0.373 | ENSG00000040933 | 208364_at   | U133A |
| 879 Rn30016229 | 0.373 | ENSG00000040933 | 204552_at   | U133A |
| 879 Rn30016229 | 0.373 | ENSG00000040933 | 204553_x_at | U133A |
| 879 Rn30016229 | 0.373 | ENSG00000040933 | 208363_s_at | U133A |
| 879 Rn30016229 | 0.373 | ENSG00000040933 | 208364_at   | U133A |
| 877 Rn30002352 | 0.373 | ENSG00000125398 | 202935_s_at | U133A |
| 877 Rn30002352 | 0.373 | ENSG00000125398 | 202936_s_at | U133A |
| 878 Rn30018700 | 0.373 | ENSG00000090565 | 203933_at   | U133A |
| 878 Rn30018700 | 0.373 | ENSG00000090565 | 214999_s_at | U133A |
| 878 Rn30018700 | 0.373 | ENSG00000090565 | 203933_at   | U133A |
| 878 Rn30018700 | 0.373 | ENSG00000090565 | 214999_s_at | U133A |
| 876 Rn30001045 | 0.374 | ENSG00000175970 | 202365_at   | U133A |
| 874 Rn30011288 | 0.375 | ENSG00000133818 | 212589_at   | U133A |
| 874 Rn30011288 | 0.375 | ENSG00000133818 | 212590_at   | U133A |

|                |       |                 |             |       |
|----------------|-------|-----------------|-------------|-------|
| 874 Rn30011288 | 0.375 | ENSG00000133818 | 208456_s_at | U133A |
| 872 Rn30002811 | 0.375 | ENSG00000188021 | 215884_s_at | U133A |
| 875 Rn30002876 | 0.375 | ENSG00000109062 | 201349_at   | U133A |
| 870 R002638_01 | 0.377 | ENSG00000196975 | 201301_s_at | U133A |
| 870 R002638_01 | 0.377 | ENSG00000196975 | 201302_at   | U133A |
| 871 Rn30016916 | 0.377 | ENSG00000105223 | 201050_at   | U133A |
| 871 Rn30016916 | 0.377 | ENSG00000105223 | 201050_at   | U133A |
| 871 Rn30016916 | 0.377 | ENSG00000105223 | 201050_at   | U133A |
| 867 R004354_01 | 0.377 | ENSG00000168216 | 218191_s_at | U133A |
| 867 R004354_01 | 0.377 | ENSG00000168216 | 218191_s_at | U133A |
| 868 Rn30018173 | 0.377 | ENSG00000105655 | 222240_s_at | U133A |
| 868 Rn30018173 | 0.377 | ENSG00000105655 | 222240_s_at | U133A |
| 868 Rn30018173 | 0.377 | ENSG00000105655 | 222240_s_at | U133A |
| 868 Rn30018173 | 0.377 | ENSG00000105655 | 222240_s_at | U133A |
| 866 Rn30005650 | 0.378 | ENSG00000197329 | 218319_at   | U133A |
| 864 Rn30015753 | 0.379 | ENSG00000068650 | 215842_s_at | U133A |
| 864 Rn30015753 | 0.379 | ENSG00000068650 | 216488_s_at | U133A |
| 864 Rn30015753 | 0.379 | ENSG00000068650 | 215842_s_at | U133A |
| 864 Rn30015753 | 0.379 | ENSG00000068650 | 216488_s_at | U133A |
| 861 Rn30005722 | 0.381 | ENSG00000110400 | 208455_at   | U133A |
| 861 Rn30005722 | 0.381 | ENSG00000110400 | 211845_at   | U133A |
| 861 Rn30005722 | 0.381 | ENSG00000110400 | 211846_s_at | U133A |
| 861 Rn30005722 | 0.381 | ENSG00000110400 | 208455_at   | U133A |
| 861 Rn30005722 | 0.381 | ENSG00000110400 | 211845_at   | U133A |
| 861 Rn30005722 | 0.381 | ENSG00000110400 | 211846_s_at | U133A |
| 861 Rn30005722 | 0.381 | ENSG00000110400 | 208455_at   | U133A |
| 861 Rn30005722 | 0.381 | ENSG00000110400 | 211845_at   | U133A |
| 861 Rn30005722 | 0.381 | ENSG00000110400 | 211846_s_at | U133A |
| 860 Rn30015761 | 0.382 | ENSG00000067057 | 201037_at   | U133A |
| 859 Rn30009263 | 0.382 | ENSG00000163191 | 200660_at   | U133A |
| 858 Rn30020542 | 0.383 | ENSG00000159842 | 212895_s_at | U133A |
| 858 Rn30020542 | 0.383 | ENSG00000159842 | 214671_s_at | U133A |
| 858 Rn30020542 | 0.383 | ENSG00000159842 | 212895_s_at | U133A |
| 858 Rn30020542 | 0.383 | ENSG00000159842 | 214671_s_at | U133A |
| 857 Rn30022612 | 0.383 | ENSG00000107338 | 204656_at   | U133A |
| 857 Rn30022612 | 0.383 | ENSG00000107338 | 204657_s_at | U133A |
| 857 Rn30022612 | 0.383 | ENSG00000107338 | 204656_at   | U133A |
| 857 Rn30022612 | 0.383 | ENSG00000107338 | 204657_s_at | U133A |
| 857 Rn30022612 | 0.383 | ENSG00000107338 | 204656_at   | U133A |
| 857 Rn30022612 | 0.383 | ENSG00000107338 | 204657_s_at | U133A |
| 856 Rn30021677 | 0.385 | ENSG00000111653 | 218234_at   | U133A |
| 856 Rn30021677 | 0.385 | ENSG00000111653 | 48825_at    | U133A |
| 856 Rn30021677 | 0.385 | ENSG00000111653 | 218234_at   | U133A |
| 856 Rn30021677 | 0.385 | ENSG00000111653 | 48825_at    | U133A |
| 856 Rn30021677 | 0.385 | ENSG00000111653 | 218234_at   | U133A |
| 856 Rn30021677 | 0.385 | ENSG00000111653 | 48825_at    | U133A |
| 853 Rn30007462 | 0.386 | ENSG00000059378 | 218543_s_at | U133A |
| 854 Rn30012628 | 0.386 | ENSG00000154845 | 201594_s_at | U133A |
| 851 Rn30016793 | 0.388 | ENSG00000133805 | 207992_s_at | U133A |
| 851 Rn30016793 | 0.388 | ENSG00000133805 | 209491_s_at | U133A |
| 851 Rn30016793 | 0.388 | ENSG00000133805 | 207992_s_at | U133A |
| 851 Rn30016793 | 0.388 | ENSG00000133805 | 209491_s_at | U133A |
| 850 R000978_01 | 0.389 | ENSG00000134202 | 202554_s_at | U133A |





|                |       |                 |             |       |
|----------------|-------|-----------------|-------------|-------|
| 837 Rn30017939 | 0.395 | ENSG00000103507 | 202030_at   | U133A |
| 837 Rn30017939 | 0.395 | ENSG00000103507 | 202030_at   | U133A |
| 835 Rn30000942 | 0.396 | ENSG00000136238 | 208640_at   | U133A |
| 835 Rn30000942 | 0.396 | ENSG00000136238 | 208641_s_at | U133A |
| 835 Rn30000942 | 0.396 | ENSG00000136238 | 208640_at   | U133A |
| 835 Rn30000942 | 0.396 | ENSG00000136238 | 208641_s_at | U133A |
| 834 Rn30012712 | 0.396 | ENSG00000111726 | 218111_s_at | U133A |
| 834 Rn30012712 | 0.396 | ENSG00000111726 | 218111_s_at | U133A |
| 834 Rn30012712 | 0.396 | ENSG00000111726 | 218111_s_at | U133A |
| 832 R005354_01 | 0.397 | ENSG00000140575 | 200791_s_at | U133A |
| 832 R005354_01 | 0.397 | ENSG00000140575 | 210840_s_at | U133A |
| 832 R005354_01 | 0.397 | ENSG00000140575 | 213446_s_at | U133A |
| 831 Rn30002147 | 0.398 | ENSG00000074054 | 212752_at   | U133A |
| 829 Rn30016093 | 0.4   | ENSG00000175416 | 216934_at   | U133A |
| 829 Rn30016093 | 0.4   | ENSG00000175416 | 205172_x_at | U133A |
| 829 Rn30016093 | 0.4   | ENSG00000175416 | 206284_x_at | U133A |
| 829 Rn30016093 | 0.4   | ENSG00000175416 | 211043_s_at | U133A |
| 829 Rn30016093 | 0.4   | ENSG00000175416 | 216934_at   | U133A |
| 829 Rn30016093 | 0.4   | ENSG00000175416 | 205172_x_at | U133A |
| 829 Rn30016093 | 0.4   | ENSG00000175416 | 206284_x_at | U133A |
| 829 Rn30016093 | 0.4   | ENSG00000175416 | 211043_s_at | U133A |
| 828 Rn30006448 | 0.4   | ENSG00000172086 | 218303_x_at | U133A |
| 828 Rn30006448 | 0.4   | ENSG00000172086 | 218303_x_at | U133A |
| 827 Rn30018515 | 0.4   | ENSG00000174744 | 215631_s_at | U133A |
| 823 Rn30024540 | 0.401 | ENSG00000152465 | 215743_at   | U133A |
| 823 Rn30024540 | 0.401 | ENSG00000152465 | 215069_at   | U133A |
| 823 Rn30024540 | 0.401 | ENSG00000152465 | 205005_s_at | U133A |
| 823 Rn30024540 | 0.401 | ENSG00000152465 | 205006_s_at | U133A |
| 822 R005098_01 | 0.402 | ENSG00000157379 | 213279_at   | U133A |
| 820 Rn30011393 | 0.403 | ENSG00000151689 | 202794_at   | U133A |
| 821 Rn30026041 | 0.403 | ENSG00000120899 | 203110_at   | U133A |
| 821 Rn30026041 | 0.403 | ENSG00000120899 | 203111_s_at | U133A |
| 821 Rn30026041 | 0.403 | ENSG00000120899 | 203110_at   | U133A |
| 821 Rn30026041 | 0.403 | ENSG00000120899 | 203111_s_at | U133A |
| 815 Rn30007989 | 0.406 | ENSG00000072415 | 219321_at   | U133A |
| 812 Rn30009004 | 0.406 | ENSG00000104765 | 221478_at   | U133A |
| 812 Rn30009004 | 0.406 | ENSG00000104765 | 221479_s_at | U133A |
| 814 Rn30009696 | 0.406 | ENSG00000100294 | 213132_s_at | U133A |
| 814 Rn30009696 | 0.406 | ENSG00000100294 | 213132_s_at | U133A |
| 816 Rn30017425 | 0.406 | ENSG00000168411 | 218564_at   | U133A |
| 811 Rn30013438 | 0.407 | ENSG00000108854 | 205596_s_at | U133A |
| 810 Rn30016829 | 0.408 | ENSG00000168638 | 202646_s_at | U133A |
| 810 Rn30016829 | 0.408 | ENSG00000168638 | 202647_s_at | U133A |
| 806 Rn30009180 | 0.409 | ENSG00000159788 | 209639_s_at | U133A |
| 806 Rn30009180 | 0.409 | ENSG00000159788 | 209637_s_at | U133A |
| 806 Rn30009180 | 0.409 | ENSG00000159788 | 205823_at   | U133A |
| 806 Rn30009180 | 0.409 | ENSG00000159788 | 209639_s_at | U133A |
| 806 Rn30009180 | 0.409 | ENSG00000159788 | 209637_s_at | U133A |
| 806 Rn30009180 | 0.409 | ENSG00000159788 | 205823_at   | U133A |
| 806 Rn30009180 | 0.409 | ENSG00000159788 | 214361_s_at | U133A |
| 806 Rn30009180 | 0.409 | ENSG00000159788 | 214362_at   | U133A |
| 806 Rn30009180 | 0.409 | ENSG00000159788 | 209639_s_at | U133A |
| 806 Rn30009180 | 0.409 | ENSG00000159788 | 209637_s_at | U133A |





|                |       |                 |             |       |
|----------------|-------|-----------------|-------------|-------|
| 788 Rn30020832 | 0.422 | ENSG00000157985 | 204066_s_at | U133A |
| 788 Rn30020832 | 0.422 | ENSG00000157985 | 204066_s_at | U133A |
| 786 Rn30001106 | 0.423 | ENSG00000099991 | 202624_s_at | U133A |
| 786 Rn30001106 | 0.423 | ENSG00000099991 | 37652_at    | U133A |
| 786 Rn30001106 | 0.423 | ENSG00000099991 | 202624_s_at | U133A |
| 786 Rn30001106 | 0.423 | ENSG00000099991 | 37652_at    | U133A |
| 787 Rn30016293 | 0.423 | ENSG00000134255 | 219375_at   | U133A |
| 787 Rn30016293 | 0.423 | ENSG00000134255 | 219375_at   | U133A |
| 784 Rn30001399 | 0.425 | ENSG00000142192 | 200602_at   | U133A |
| 784 Rn30001399 | 0.425 | ENSG00000142192 | 214953_s_at | U133A |
| 784 Rn30001399 | 0.425 | ENSG00000142192 | 211277_x_at | U133A |
| 784 Rn30001399 | 0.425 | ENSG00000142192 | 200602_at   | U133A |
| 784 Rn30001399 | 0.425 | ENSG00000142192 | 214953_s_at | U133A |
| 784 Rn30001399 | 0.425 | ENSG00000142192 | 211277_x_at | U133A |
| 784 Rn30001399 | 0.425 | ENSG00000142192 | 200602_at   | U133A |
| 784 Rn30001399 | 0.425 | ENSG00000142192 | 214953_s_at | U133A |
| 784 Rn30001399 | 0.425 | ENSG00000142192 | 211277_x_at | U133A |
| 784 Rn30001399 | 0.425 | ENSG00000142192 | 200602_at   | U133A |
| 784 Rn30001399 | 0.425 | ENSG00000142192 | 214953_s_at | U133A |
| 784 Rn30001399 | 0.425 | ENSG00000142192 | 211277_x_at | U133A |
| 784 Rn30001399 | 0.425 | ENSG00000142192 | 200602_at   | U133A |
| 784 Rn30001399 | 0.425 | ENSG00000142192 | 214953_s_at | U133A |
| 784 Rn30001399 | 0.425 | ENSG00000142192 | 211277_x_at | U133A |
| 784 Rn30001399 | 0.425 | ENSG00000142192 | 200602_at   | U133A |
| 784 Rn30001399 | 0.425 | ENSG00000142192 | 214953_s_at | U133A |
| 784 Rn30001399 | 0.425 | ENSG00000142192 | 211277_x_at | U133A |
| 784 Rn30001399 | 0.425 | ENSG00000142192 | 200602_at   | U133A |
| 784 Rn30001399 | 0.425 | ENSG00000142192 | 214953_s_at | U133A |
| 784 Rn30001399 | 0.425 | ENSG00000142192 | 211277_x_at | U133A |
| 782 Rn30026054 | 0.425 | ENSG00000171475 | 212049_at   | U133A |
| 782 Rn30026054 | 0.425 | ENSG00000171475 | 212050_at   | U133A |
| 782 Rn30026054 | 0.425 | ENSG00000171475 | 212051_at   | U133A |
| 782 Rn30026054 | 0.425 | ENSG00000171475 | 216006_at   | U133A |
| 781 Rn30009008 | 0.425 | ENSG00000168310 | 203275_at   | U133A |
| 783 Rn30011937 | 0.425 | ENSG00000097033 | 209090_s_at | U133A |
| 783 Rn30011937 | 0.425 | ENSG00000097033 | 209091_s_at | U133A |
| 783 Rn30011937 | 0.425 | ENSG00000097033 | 210101_x_at | U133A |
| 783 Rn30011937 | 0.425 | ENSG00000097033 | 209090_s_at | U133A |
| 783 Rn30011937 | 0.425 | ENSG00000097033 | 209091_s_at | U133A |
| 783 Rn30011937 | 0.425 | ENSG00000097033 | 210101_x_at | U133A |
| 780 Rn30022277 | 0.426 | ENSG00000134871 | 211964_at   | U133A |
| 780 Rn30022277 | 0.426 | ENSG00000134871 | 211966_at   | U133A |
| 780 Rn30022277 | 0.426 | ENSG00000134871 | 211964_at   | U133A |
| 780 Rn30022277 | 0.426 | ENSG00000134871 | 211966_at   | U133A |
| 780 Rn30022277 | 0.426 | ENSG00000134871 | 211964_at   | U133A |
| 780 Rn30022277 | 0.426 | ENSG00000134871 | 211966_at   | U133A |
| 780 Rn30022277 | 0.426 | ENSG00000134871 | 211964_at   | U133A |
| 780 Rn30022277 | 0.426 | ENSG00000134871 | 211966_at   | U133A |
| 780 Rn30022277 | 0.426 | ENSG00000134871 | 211964_at   | U133A |
| 780 Rn30022277 | 0.426 | ENSG00000134871 | 211966_at   | U133A |
| 780 Rn30022277 | 0.426 | ENSG00000134871 | 211964_at   | U133A |
| 780 Rn30022277 | 0.426 | ENSG00000134871 | 211966_at   | U133A |
| 779 Rn30012001 | 0.427 | ENSG00000172007 | 221014_s_at | U133A |
| 777 Rn30018464 | 0.427 | ENSG00000148498 | 210094_s_at | U133A |
| 777 Rn30018464 | 0.427 | ENSG00000148498 | 221280_s_at | U133A |

|                |                       |             |       |
|----------------|-----------------------|-------------|-------|
| 777 Rn30018464 | 0.427 ENSG00000148498 | 221526_x_at | U133A |
| 777 Rn30018464 | 0.427 ENSG00000148498 | 221527_s_at | U133A |
| 777 Rn30018464 | 0.427 ENSG00000148498 | 210094_s_at | U133A |
| 777 Rn30018464 | 0.427 ENSG00000148498 | 221280_s_at | U133A |
| 777 Rn30018464 | 0.427 ENSG00000148498 | 221526_x_at | U133A |
| 777 Rn30018464 | 0.427 ENSG00000148498 | 221527_s_at | U133A |
| 777 Rn30018464 | 0.427 ENSG00000148498 | 210094_s_at | U133A |
| 777 Rn30018464 | 0.427 ENSG00000148498 | 221280_s_at | U133A |
| 777 Rn30018464 | 0.427 ENSG00000148498 | 221526_x_at | U133A |
| 777 Rn30018464 | 0.427 ENSG00000148498 | 221527_s_at | U133A |
| 777 Rn30018464 | 0.427 ENSG00000148498 | 210094_s_at | U133A |
| 777 Rn30018464 | 0.427 ENSG00000148498 | 221280_s_at | U133A |
| 777 Rn30018464 | 0.427 ENSG00000148498 | 221526_x_at | U133A |
| 777 Rn30018464 | 0.427 ENSG00000148498 | 221527_s_at | U133A |
| 777 Rn30018464 | 0.427 ENSG00000148498 | 210094_s_at | U133A |
| 777 Rn30018464 | 0.427 ENSG00000148498 | 221280_s_at | U133A |
| 777 Rn30018464 | 0.427 ENSG00000148498 | 221526_x_at | U133A |
| 777 Rn30018464 | 0.427 ENSG00000148498 | 221527_s_at | U133A |
| 777 Rn30018464 | 0.427 ENSG00000148498 | 210094_s_at | U133A |
| 777 Rn30018464 | 0.427 ENSG00000148498 | 221280_s_at | U133A |
| 777 Rn30018464 | 0.427 ENSG00000148498 | 221526_x_at | U133A |
| 777 Rn30018464 | 0.427 ENSG00000148498 | 221527_s_at | U133A |
| 777 Rn30018464 | 0.427 ENSG00000148498 | 210094_s_at | U133A |
| 777 Rn30018464 | 0.427 ENSG00000148498 | 221280_s_at | U133A |
| 777 Rn30018464 | 0.427 ENSG00000148498 | 221526_x_at | U133A |
| 777 Rn30018464 | 0.427 ENSG00000148498 | 221527_s_at | U133A |
| 777 Rn30018464 | 0.427 ENSG00000148498 | 210094_s_at | U133A |
| 777 Rn30018464 | 0.427 ENSG00000148498 | 221280_s_at | U133A |
| 777 Rn30018464 | 0.427 ENSG00000148498 | 221526_x_at | U133A |
| 777 Rn30018464 | 0.427 ENSG00000148498 | 221527_s_at | U133A |
| 776 Rn30001879 | 0.431 ENSG00000163629 | 204201_s_at | U133A |
| 776 Rn30001879 | 0.431 ENSG00000163629 | 204201_s_at | U133A |
| 776 Rn30001879 | 0.431 ENSG00000163629 | 204201_s_at | U133A |
| 774 Rn30004042 | 0.432 ENSG00000066739 | 219164_s_at | U133A |
| 775 Rn30003149 | 0.432 ENSG00000158850 | 210243_s_at | U133A |
| 775 Rn30003149 | 0.432 ENSG00000158850 | 210243_s_at | U133A |
| 775 Rn30003149 | 0.432 ENSG00000158850 | 210243_s_at | U133A |
| 773 Rn30024893 | 0.433 ENSG00000167118 | 208101_s_at | U133A |
| 771 R000326_01 | 0.434 ENSG00000128016 | 201531_at   | U133A |
| 770 R004115_01 | 0.434 ENSG00000076928 | 203055_s_at | U133A |
| 770 R004115_01 | 0.434 ENSG00000076928 | 203055_s_at | U133A |
| 770 R004115_01 | 0.434 ENSG00000076928 | 203055_s_at | U133A |
| 770 R004115_01 | 0.434 ENSG00000076928 | 203055_s_at | U133A |
| 770 R004115_01 | 0.434 ENSG00000076928 | 203055_s_at | U133A |
| 770 R004115_01 | 0.434 ENSG00000076928 | 203055_s_at | U133A |
| 770 R004115_01 | 0.434 ENSG00000076928 | 203055_s_at | U133A |
| 770 R004115_01 | 0.434 ENSG00000076928 | 203055_s_at | U133A |
| 770 R004115_01 | 0.434 ENSG00000076928 | 203055_s_at | U133A |
| 769 Rn30010409 | 0.435 ENSG00000176248 | 218555_at   | U133A |
| 765 R003023_01 | 0.437 ENSG00000123159 | 207525_s_at | U133A |
| 765 R003023_01 | 0.437 ENSG00000123159 | 207525_s_at | U133A |
| 764 Rn30000141 | 0.438 ENSG00000110002 | 205011_at   | U133A |
| 764 Rn30000141 | 0.438 ENSG00000110002 | 210102_at   | U133A |
| 764 Rn30000141 | 0.438 ENSG00000110002 | 205011_at   | U133A |
| 764 Rn30000141 | 0.438 ENSG00000110002 | 210102_at   | U133A |
| 763 Rn30006566 | 0.439 ENSG00000118639 | 202636_at   | U133A |
| 761 Rn30010540 | 0.439 ENSG00000076554 | 201688_s_at | U133A |
| 761 Rn30010540 | 0.439 ENSG00000076554 | 201689_s_at | U133A |

|                |       |                 |             |       |
|----------------|-------|-----------------|-------------|-------|
| 761 Rn30010540 | 0.439 | ENSG00000076554 | 201690_s_at | U133A |
| 761 Rn30010540 | 0.439 | ENSG00000076554 | 201691_s_at | U133A |
| 762 R000458_01 | 0.439 | ENSG00000108679 | 200923_at   | U133A |
| 756 Rn30001377 | 0.443 | ENSG00000091436 | 218833_at   | U133A |
| 756 Rn30001377 | 0.443 | ENSG00000091436 | 218833_at   | U133A |
| 756 Rn30001377 | 0.443 | ENSG00000091436 | 218833_at   | U133A |
| 753 Rn30014565 | 0.446 | ENSG00000107020 | 218992_at   | U133A |
| 752 Rn30009229 | 0.446 | ENSG00000081277 | 205724_at   | U133A |
| 752 Rn30009229 | 0.446 | ENSG00000081277 | 205724_at   | U133A |
| 751 Rn30004362 | 0.447 | ENSG00000100345 | 211926_s_at | U133A |
| 751 Rn30004362 | 0.447 | ENSG00000100345 | 211926_s_at | U133A |
| 751 Rn30004362 | 0.447 | ENSG00000100345 | 215182_x_at | U133A |
| 751 Rn30004362 | 0.447 | ENSG00000100345 | 211926_s_at | U133A |
| 747 Rn30012532 | 0.45  | ENSG00000185043 | 201953_at   | U133A |
| 748 Rn30026379 | 0.45  | ENSG00000169093 | 209394_at   | U133A |
| 748 Rn30026379 | 0.45  | ENSG00000169093 | 36554_at    | U133A |
| 748 Rn30026379 | 0.45  | ENSG00000169093 | 209394_at   | U133A |
| 748 Rn30026379 | 0.45  | ENSG00000169093 | 36554_at    | U133A |
| 748 Rn30026379 | 0.45  | ENSG00000169093 | 209394_at   | U133A |
| 748 Rn30026379 | 0.45  | ENSG00000169093 | 36554_at    | U133A |
| 748 Rn30026379 | 0.45  | ENSG00000169093 | 209394_at   | U133A |
| 748 Rn30026379 | 0.45  | ENSG00000169093 | 36554_at    | U133A |
| 748 Rn30026379 | 0.45  | ENSG00000169093 | 209394_at   | U133A |
| 748 Rn30026379 | 0.45  | ENSG00000169093 | 36554_at    | U133A |
| 748 Rn30026379 | 0.45  | ENSG00000169093 | 209394_at   | U133A |
| 748 Rn30026379 | 0.45  | ENSG00000169093 | 36554_at    | U133A |
| 746 Rn30009655 | 0.451 | ENSG00000167182 | 204367_at   | U133A |
| 746 Rn30009655 | 0.451 | ENSG00000167182 | 211736_at   | U133A |
| 746 Rn30009655 | 0.451 | ENSG00000167182 | 204367_at   | U133A |
| 746 Rn30009655 | 0.451 | ENSG00000167182 | 211736_at   | U133A |
| 744 R000680_01 | 0.451 | ENSG00000007168 | 200813_s_at | U133A |
| 744 R000680_01 | 0.451 | ENSG00000007168 | 200816_s_at | U133A |
| 744 R000680_01 | 0.451 | ENSG00000007168 | 200815_s_at | U133A |
| 744 R000680_01 | 0.451 | ENSG00000007168 | 211547_s_at | U133A |
| 743 Rn30001566 | 0.452 | ENSG00000041802 | 221535_at   | U133A |
| 743 Rn30001566 | 0.452 | ENSG00000041802 | 221536_s_at | U133A |
| 742 R002464_01 | 0.453 | ENSG00000133794 | 209824_s_at | U133A |
| 742 R002464_01 | 0.453 | ENSG00000133794 | 210971_s_at | U133A |
| 742 R002464_01 | 0.453 | ENSG00000133794 | 209824_s_at | U133A |
| 742 R002464_01 | 0.453 | ENSG00000133794 | 210971_s_at | U133A |
| 742 R002464_01 | 0.453 | ENSG00000133794 | 209824_s_at | U133A |
| 742 R002464_01 | 0.453 | ENSG00000133794 | 210971_s_at | U133A |
| 742 R002464_01 | 0.453 | ENSG00000133794 | 209824_s_at | U133A |
| 742 R002464_01 | 0.453 | ENSG00000133794 | 210971_s_at | U133A |
| 741 R002955_01 | 0.454 | ENSG00000118640 | 202546_at   | U133A |
| 740 Rn30004418 | 0.454 | ENSG00000012983 | 203552_at   | U133A |
| 740 Rn30004418 | 0.454 | ENSG00000012983 | 203553_s_at | U133A |
| 740 Rn30004418 | 0.454 | ENSG00000012983 | 211081_s_at | U133A |
| 739 Rn30009738 | 0.455 | ENSG00000152558 | 211967_at   | U133A |
| 739 Rn30009738 | 0.455 | ENSG00000152558 | 211967_at   | U133A |
| 735 R002712_01 | 0.456 | ENSG00000134107 | 201169_s_at | U133A |
| 735 R002712_01 | 0.456 | ENSG00000134107 | 201170_s_at | U133A |
| 737 Rn30014660 | 0.456 | ENSG00000127603 | 207358_x_at | U133A |





|                |       |                 |             |       |
|----------------|-------|-----------------|-------------|-------|
| 734 Rn30026425 | 0.456 | ENSG00000197976 | 206779_s_at | U133A |
| 734 Rn30026425 | 0.456 | ENSG00000197976 | 210269_s_at | U133A |
| 734 Rn30026425 | 0.456 | ENSG00000197976 | 203624_at   | U133A |
| 734 Rn30026425 | 0.456 | ENSG00000197976 | 206779_s_at | U133A |
| 732 Rn30013927 | 0.457 | ENSG00000111752 | 218338_at   | U133A |
| 729 Rn30010858 | 0.457 | ENSG00000159403 | 212067_s_at | U133A |
| 726 Rn30003094 | 0.458 | ENSG00000154229 | 206923_at   | U133A |
| 726 Rn30003094 | 0.458 | ENSG00000154229 | 213093_at   | U133A |
| 726 Rn30003094 | 0.458 | ENSG00000154229 | 215195_at   | U133A |
| 728 Rn30011695 | 0.458 | ENSG00000111711 | 218193_s_at | U133A |
| 727 Rn30003737 | 0.458 | ENSG00000071189 | 213292_s_at | U133A |
| 727 Rn30003737 | 0.458 | ENSG00000071189 | 215820_x_at | U133A |
| 727 Rn30003737 | 0.458 | ENSG00000071189 | 215366_at   | U133A |
| 727 Rn30003737 | 0.458 | ENSG00000071189 | 213292_s_at | U133A |
| 727 Rn30003737 | 0.458 | ENSG00000071189 | 215820_x_at | U133A |
| 727 Rn30003737 | 0.458 | ENSG00000071189 | 215366_at   | U133A |
| 727 Rn30003737 | 0.458 | ENSG00000071189 | 213292_s_at | U133A |
| 727 Rn30003737 | 0.458 | ENSG00000071189 | 215820_x_at | U133A |
| 727 Rn30003737 | 0.458 | ENSG00000071189 | 215366_at   | U133A |
| 722 Rn30017844 | 0.459 | ENSG00000105648 | 201422_at   | U133A |
| 725 Rn30015520 | 0.459 | ENSG00000178502 | 220657_at   | U133A |
| 724 Rn30018204 | 0.459 | ENSG00000177469 | 208789_at   | U133A |
| 724 Rn30018204 | 0.459 | ENSG00000177469 | 208790_s_at | U133A |
| 724 Rn30018204 | 0.459 | ENSG00000177469 | 208789_at   | U133A |
| 724 Rn30018204 | 0.459 | ENSG00000177469 | 208790_s_at | U133A |
| 723 Rn30012496 | 0.459 | ENSG00000115419 | 211414_at   | U133A |
| 723 Rn30012496 | 0.459 | ENSG00000115419 | 221510_s_at | U133A |
| 723 Rn30012496 | 0.459 | ENSG00000115419 | 203158_s_at | U133A |
| 723 Rn30012496 | 0.459 | ENSG00000115419 | 203157_s_at | U133A |
| 723 Rn30012496 | 0.459 | ENSG00000115419 | 203159_at   | U133A |
| 723 Rn30012496 | 0.459 | ENSG00000115419 | 211414_at   | U133A |
| 723 Rn30012496 | 0.459 | ENSG00000115419 | 221510_s_at | U133A |
| 723 Rn30012496 | 0.459 | ENSG00000115419 | 203158_s_at | U133A |
| 723 Rn30012496 | 0.459 | ENSG00000115419 | 203157_s_at | U133A |
| 723 Rn30012496 | 0.459 | ENSG00000115419 | 203159_at   | U133A |
| 720 Rn30025347 | 0.46  | ENSG00000139372 | 203742_s_at | U133A |
| 720 Rn30025347 | 0.46  | ENSG00000139372 | 203743_s_at | U133A |
| 719 Rn30016062 | 0.461 | ENSG00000007255 | 204985_s_at | U133A |
| 719 Rn30016062 | 0.461 | ENSG00000007255 | 204985_s_at | U133A |
| 718 Rn30017771 | 0.461 | ENSG00000130147 | 222258_s_at | U133A |
| 718 Rn30017771 | 0.461 | ENSG00000130147 | 222258_s_at | U133A |
| 718 Rn30017771 | 0.461 | ENSG00000130147 | 222258_s_at | U133A |
| 717 Rn30026524 | 0.462 | ENSG00000099956 | 212167_s_at | U133A |
| 717 Rn30026524 | 0.462 | ENSG00000099956 | 206532_at   | U133A |
| 717 Rn30026524 | 0.462 | ENSG00000099956 | 212167_s_at | U133A |
| 717 Rn30026524 | 0.462 | ENSG00000099956 | 206532_at   | U133A |
| 715 Rn30026944 | 0.462 | ENSG00000083857 | 201579_at   | U133A |
| 713 Rn30017612 | 0.464 | ENSG00000070501 | 203616_at   | U133A |
| 712 Rn30006373 | 0.465 | ENSG00000151491 | 202609_at   | U133A |
| 711 Rn30004468 | 0.466 | ENSG00000183696 | 203234_at   | U133A |
| 711 Rn30004468 | 0.466 | ENSG00000183696 | 203234_at   | U133A |
| 710 Rn30005874 | 0.466 | ENSG00000126822 | 212821_at   | U133A |
| 710 Rn30005874 | 0.466 | ENSG00000126822 | 212823_s_at | U133A |

|                |       |                 |             |       |
|----------------|-------|-----------------|-------------|-------|
| 710 Rn30005874 | 0.466 | ENSG00000126822 | 212821_at   | U133A |
| 710 Rn30005874 | 0.466 | ENSG00000126822 | 212823_s_at | U133A |
| 710 Rn30005874 | 0.466 | ENSG00000126822 | 212821_at   | U133A |
| 710 Rn30005874 | 0.466 | ENSG00000126822 | 212823_s_at | U133A |
| 709 Rn30016917 | 0.467 | ENSG00000167797 | 203252_at   | U133A |
| 707 Rn30017611 | 0.467 | ENSG00000148175 | 201060_x_at | U133A |
| 707 Rn30017611 | 0.467 | ENSG00000148175 | 201061_s_at | U133A |
| 707 Rn30017611 | 0.467 | ENSG00000148175 | 201062_at   | U133A |
| 707 Rn30017611 | 0.467 | ENSG00000148175 | 201060_x_at | U133A |
| 707 Rn30017611 | 0.467 | ENSG00000148175 | 201061_s_at | U133A |
| 707 Rn30017611 | 0.467 | ENSG00000148175 | 201062_at   | U133A |
| 706 Rn30020972 | 0.47  | ENSG00000136504 | 200049_at   | U133A |
| 705 Rn30006853 | 0.471 | ENSG00000023697 | 218102_at   | U133A |
| 703 Rn30017124 | 0.472 | ENSG00000112448 | 212116_at   | U133A |
| 703 Rn30017124 | 0.472 | ENSG00000112448 | 212118_at   | U133A |
| 703 Rn30017124 | 0.472 | ENSG00000112448 | 210541_s_at | U133A |
| 703 Rn30017124 | 0.472 | ENSG00000112448 | 212116_at   | U133A |
| 703 Rn30017124 | 0.472 | ENSG00000112448 | 212118_at   | U133A |
| 703 Rn30017124 | 0.472 | ENSG00000112448 | 210541_s_at | U133A |
| 702 Rn30016918 | 0.473 | ENSG00000107854 | 218228_s_at | U133A |
| 700 Rn30010224 | 0.474 | ENSG00000176101 | 210378_s_at | U133A |
| 699 Rn30000990 | 0.475 | ENSG00000075624 | 200801_x_at | U133A |
| 699 Rn30000990 | 0.475 | ENSG00000075624 | 200801_x_at | U133A |
| 699 Rn30000990 | 0.475 | ENSG00000075624 | 200801_x_at | U133A |
| 699 Rn30000990 | 0.475 | ENSG00000075624 | 200801_x_at | U133A |
| 698 R000046_01 | 0.476 | ENSG00000131981 | 208949_s_at | U133A |
| 697 Rn30018174 | 0.477 | ENSG00000168610 | 208991_at   | U133A |
| 697 Rn30018174 | 0.477 | ENSG00000168610 | 208992_s_at | U133A |
| 695 R000634_01 | 0.478 | ENSG00000148985 | 215293_s_at | U133A |
| 695 R000634_01 | 0.478 | ENSG00000148985 | 41858_at    | U133A |
| 695 R000634_01 | 0.478 | ENSG00000148985 | 215293_s_at | U133A |
| 695 R000634_01 | 0.478 | ENSG00000148985 | 41858_at    | U133A |
| 695 R000634_01 | 0.478 | ENSG00000148985 | 215293_s_at | U133A |
| 695 R000634_01 | 0.478 | ENSG00000148985 | 41858_at    | U133A |
| 695 R000634_01 | 0.478 | ENSG00000148985 | 215293_s_at | U133A |
| 695 R000634_01 | 0.478 | ENSG00000148985 | 41858_at    | U133A |
| 693 Rn30016086 | 0.48  | ENSG00000124702 | 208784_s_at | U133A |
| 693 Rn30016086 | 0.48  | ENSG00000124702 | 214383_x_at | U133A |
| 693 Rn30016086 | 0.48  | ENSG00000124702 | 208784_s_at | U133A |
| 693 Rn30016086 | 0.48  | ENSG00000124702 | 214383_x_at | U133A |
| 693 Rn30016086 | 0.48  | ENSG00000124702 | 208784_s_at | U133A |
| 693 Rn30016086 | 0.48  | ENSG00000124702 | 214383_x_at | U133A |
| 690 Rn30008577 | 0.481 | ENSG00000163703 | 203368_at   | U133A |
| 690 Rn30008577 | 0.481 | ENSG00000163703 | 203368_at   | U133A |
| 689 Rn30004648 | 0.481 | ENSG00000126821 | 221268_s_at | U133A |
| 687 Rn30018904 | 0.483 | ENSG00000175550 | 203258_at   | U133A |
| 687 Rn30018904 | 0.483 | ENSG00000175550 | 203258_at   | U133A |
| 682 R002651_01 | 0.484 | ENSG00000175334 | 210125_s_at | U133A |
| 681 Rn30007943 | 0.484 | ENSG00000118200 | 217196_s_at | U133A |
| 681 Rn30007943 | 0.484 | ENSG00000118200 | 212763_at   | U133A |
| 681 Rn30007943 | 0.484 | ENSG00000118200 | 212765_at   | U133A |
| 681 Rn30007943 | 0.484 | ENSG00000118200 | 217196_s_at | U133A |
| 681 Rn30007943 | 0.484 | ENSG00000118200 | 212763_at   | U133A |

|                |       |                 |             |       |
|----------------|-------|-----------------|-------------|-------|
| 681 Rn30007943 | 0.484 | ENSG00000118200 | 212765_at   | U133A |
| 683 Rn30018444 | 0.484 | ENSG00000116584 | 207629_s_at | U133A |
| 683 Rn30018444 | 0.484 | ENSG00000116584 | 209435_s_at | U133A |
| 683 Rn30018444 | 0.484 | ENSG00000116584 | 207629_s_at | U133A |
| 683 Rn30018444 | 0.484 | ENSG00000116584 | 209435_s_at | U133A |
| 683 Rn30018444 | 0.484 | ENSG00000116584 | 207629_s_at | U133A |
| 683 Rn30018444 | 0.484 | ENSG00000116584 | 209435_s_at | U133A |
| 679 Rn30017412 | 0.487 | ENSG00000100372 | 211754_s_at | U133A |
| 679 Rn30017412 | 0.487 | ENSG00000100372 | 214210_at   | U133A |
| 678 R000427_01 | 0.487 | ENSG00000197142 | 218322_s_at | U133A |
| 678 R000427_01 | 0.487 | ENSG00000197142 | 218322_s_at | U133A |
| 678 R000427_01 | 0.487 | ENSG00000197142 | 218322_s_at | U133A |
| 678 R000427_01 | 0.487 | ENSG00000197142 | 218322_s_at | U133A |
| 673 Rn30011768 | 0.489 | ENSG00000146067 | 218920_at   | U133A |
| 673 Rn30011768 | 0.489 | ENSG00000146067 | 218920_at   | U133A |
| 672 R000930_01 | 0.49  | ENSG00000053371 | 202139_at   | U133A |
| 672 R000930_01 | 0.49  | ENSG00000053371 | 214259_s_at | U133A |
| 672 R000930_01 | 0.49  | ENSG00000053371 | 202139_at   | U133A |
| 672 R000930_01 | 0.49  | ENSG00000053371 | 214259_s_at | U133A |
| 669 R002354_01 | 0.491 | ENSG00000079257 | 218729_at   | U133A |
| 670 Rn30016285 | 0.491 | ENSG00000113119 | 213550_s_at | U133A |
| 670 Rn30016285 | 0.491 | ENSG00000113119 | 221096_s_at | U133A |
| 668 Rn30012858 | 0.493 | ENSG00000064932 | 204166_at   | U133A |
| 668 Rn30012858 | 0.493 | ENSG00000064932 | 215760_s_at | U133A |
| 668 Rn30012858 | 0.493 | ENSG00000064932 | 204166_at   | U133A |
| 668 Rn30012858 | 0.493 | ENSG00000064932 | 215760_s_at | U133A |
| 667 R002068_01 | 0.493 | ENSG00000133511 | 207081_s_at | U133A |
| 666 Rn30022557 | 0.495 | ENSG00000176973 | 212484_at   | U133A |
| 666 Rn30022557 | 0.495 | ENSG00000176973 | 32209_at    | U133A |
| 665 Rn30014786 | 0.495 | ENSG00000172053 | 217846_at   | U133A |
| 663 Rn30006760 | 0.497 | ENSG00000164402 | 208999_at   | U133A |
| 663 Rn30006760 | 0.497 | ENSG00000164402 | 209000_s_at | U133A |
| 663 Rn30006760 | 0.497 | ENSG00000164402 | 208999_at   | U133A |
| 663 Rn30006760 | 0.497 | ENSG00000164402 | 209000_s_at | U133A |
| 662 Rn30008120 | 0.498 | ENSG00000159176 | 200621_at   | U133A |
| 660 Rn30001709 | 0.499 | ENSG00000099942 | 206184_at   | U133A |
| 660 Rn30001709 | 0.499 | ENSG00000099942 | 212180_at   | U133A |
| 660 Rn30001709 | 0.499 | ENSG00000099942 | 206184_at   | U133A |
| 660 Rn30001709 | 0.499 | ENSG00000099942 | 212180_at   | U133A |
| 661 R004855_01 | 0.499 | ENSG00000180370 | 205962_at   | U133A |
| 661 R004855_01 | 0.499 | ENSG00000180370 | 208878_s_at | U133A |
| 661 R004855_01 | 0.499 | ENSG00000180370 | 208875_s_at | U133A |
| 661 R004855_01 | 0.499 | ENSG00000180370 | 208876_s_at | U133A |
| 661 R004855_01 | 0.499 | ENSG00000180370 | 208877_at   | U133A |
| 659 Rn30012603 | 2.002 | ENSG00000137776 | 217828_at   | U133A |
| 659 Rn30012603 | 2.002 | ENSG00000137776 | 217828_at   | U133A |
| 658 Rn30006834 | 2.002 | ENSG00000070669 | 205047_s_at | U133A |
| 658 Rn30006834 | 2.002 | ENSG00000070669 | 205047_s_at | U133A |
| 656 R005340_01 | 2.008 | ENSG00000120963 | 218059_at   | U133A |
| 656 R005340_01 | 2.008 | ENSG00000120963 | 218059_at   | U133A |
| 657 R001271_01 | 2.008 | ENSG00000079739 | 201968_s_at | U133A |
| 657 R001271_01 | 2.008 | ENSG00000079739 | 201968_s_at | U133A |
| 650 Rn30001135 | 2.012 | ENSG00000186298 | 200726_at   | U133A |

|                |                       |             |       |
|----------------|-----------------------|-------------|-------|
| 650 Rn30001135 | 2.012 ENSG00000186298 | 200726_at   | U133A |
| 651 Rn30004935 | 2.012 ENSG00000060138 | 201160_s_at | U133A |
| 651 Rn30004935 | 2.012 ENSG00000060138 | 201161_s_at | U133A |
| 651 Rn30004935 | 2.012 ENSG00000060138 | 201160_s_at | U133A |
| 651 Rn30004935 | 2.012 ENSG00000060138 | 201161_s_at | U133A |
| 648 Rn30017687 | 2.015 ENSG00000168765 | 204149_s_at | U133A |
| 648 Rn30017687 | 2.015 ENSG00000168765 | 210912_x_at | U133A |
| 648 Rn30017687 | 2.015 ENSG00000168765 | 204149_s_at | U133A |
| 648 Rn30017687 | 2.015 ENSG00000168765 | 210912_x_at | U133A |
| 648 Rn30017687 | 2.015 ENSG00000168765 | 204149_s_at | U133A |
| 648 Rn30017687 | 2.015 ENSG00000168765 | 210912_x_at | U133A |
| 647 Rn30019497 | 2.016 ENSG00000103512 | 217225_x_at | U133A |
| 647 Rn30019497 | 2.016 ENSG00000103512 | 221852_at   | U133A |
| 647 Rn30019497 | 2.016 ENSG00000103512 | 221853_s_at | U133A |
| 646 Rn30012792 | 2.022 ENSG00000103335 | 202771_at   | U133A |
| 646 Rn30012792 | 2.022 ENSG00000103335 | 202771_at   | U133A |
| 645 Rn30016543 | 2.023 ENSG00000166311 | 209420_s_at | U133A |
| 645 Rn30016543 | 2.023 ENSG00000166311 | 216230_x_at | U133A |
| 645 Rn30016543 | 2.023 ENSG00000166311 | 217171_at   | U133A |
| 645 Rn30016543 | 2.023 ENSG00000166311 | 209420_s_at | U133A |
| 645 Rn30016543 | 2.023 ENSG00000166311 | 216230_x_at | U133A |
| 645 Rn30016543 | 2.023 ENSG00000166311 | 217171_at   | U133A |
| 645 Rn30016543 | 2.023 ENSG00000166311 | 209420_s_at | U133A |
| 645 Rn30016543 | 2.023 ENSG00000166311 | 216230_x_at | U133A |
| 645 Rn30016543 | 2.023 ENSG00000166311 | 217171_at   | U133A |
| 643 Rn30008245 | 2.028 ENSG00000176986 | 202361_at   | U133A |
| 643 Rn30008245 | 2.028 ENSG00000176986 | 202361_at   | U133A |
| 640 Rn30015378 | 2.037 ENSG00000166794 | 200967_at   | U133A |
| 640 Rn30015378 | 2.037 ENSG00000166794 | 200968_s_at | U133A |
| 639 Rn30017143 | 2.039 ENSG00000168028 | 213801_x_at | U133A |
| 638 Rn30010095 | 2.04 ENSG00000154122  | 220076_at   | U133A |
| 637 Rn30003541 | 2.041 ENSG00000139291 | 219941_at   | U133A |
| 637 Rn30003541 | 2.041 ENSG00000139291 | 219941_at   | U133A |
| 633 Rn30014384 | 2.051 ENSG00000101391 | 218315_s_at | U133A |
| 633 Rn30014384 | 2.051 ENSG00000101391 | 218315_s_at | U133A |
| 633 Rn30014384 | 2.051 ENSG00000101391 | 218315_s_at | U133A |
| 631 Rn30004184 | 2.059 ENSG00000120533 | 218482_at   | U133A |
| 630 R004406_01 | 2.06 ENSG00000157326  | 218021_at   | U133A |
| 630 R004406_01 | 2.06 ENSG00000157326  | 218021_at   | U133A |
| 630 R004406_01 | 2.06 ENSG00000157326  | 218021_at   | U133A |
| 629 Rn30006579 | 2.061 ENSG00000147601 | 203448_s_at | U133A |
| 629 Rn30006579 | 2.061 ENSG00000147601 | 203449_s_at | U133A |
| 629 Rn30006579 | 2.061 ENSG00000147601 | 203448_s_at | U133A |
| 629 Rn30006579 | 2.061 ENSG00000147601 | 203449_s_at | U133A |
| 628 Rn30026711 | 2.062 ENSG00000171150 | 208127_s_at | U133A |
| 628 Rn30026711 | 2.062 ENSG00000171150 | 209647_s_at | U133A |
| 628 Rn30026711 | 2.062 ENSG00000171150 | 209648_x_at | U133A |
| 626 Rn30012332 | 2.075 ENSG00000023909 | 203925_at   | U133A |
| 625 Rn30002405 | 2.077 ENSG00000135862 | 200770_s_at | U133A |
| 625 Rn30002405 | 2.077 ENSG00000135862 | 200771_at   | U133A |
| 624 Rn30007917 | 2.078 ENSG00000008838 | 213043_s_at | U133A |
| 624 Rn30007917 | 2.078 ENSG00000008838 | 213043_s_at | U133A |
| 619 Rn30003883 | 2.093 ENSG00000140105 | 200628_s_at | U133A |

|                |                       |             |       |
|----------------|-----------------------|-------------|-------|
| 619 Rn30003883 | 2.093 ENSG00000140105 | 200629_at   | U133A |
| 619 Rn30003883 | 2.093 ENSG00000140105 | 200628_s_at | U133A |
| 619 Rn30003883 | 2.093 ENSG00000140105 | 200629_at   | U133A |
| 619 Rn30003883 | 2.093 ENSG00000140105 | 200628_s_at | U133A |
| 619 Rn30003883 | 2.093 ENSG00000140105 | 200629_at   | U133A |
| 617 Rn30010605 | 2.095 ENSG00000102572 | 208854_s_at | U133A |
| 617 Rn30010605 | 2.095 ENSG00000102572 | 208855_s_at | U133A |
| 617 Rn30010605 | 2.095 ENSG00000102572 | 215188_at   | U133A |
| 616 Rn30007036 | 2.097 ENSG00000013016 | 218935_at   | U133A |
| 616 Rn30007036 | 2.097 ENSG00000013016 | 218935_at   | U133A |
| 615 Rn30013456 | 2.099 ENSG00000164904 | 208950_s_at | U133A |
| 615 Rn30013456 | 2.099 ENSG00000164904 | 208951_at   | U133A |
| 615 Rn30013456 | 2.099 ENSG00000164904 | 213591_at   | U133A |
| 614 Rn30005360 | 2.099 ENSG00000196937 | 201889_at   | U133A |
| 611 Rn30025168 | 2.102 ENSG00000167081 | 204082_at   | U133A |
| 611 Rn30025168 | 2.102 ENSG00000167081 | 204082_at   | U133A |
| 611 Rn30025168 | 2.102 ENSG00000167081 | 204082_at   | U133A |
| 613 Rn30016409 | 2.102 ENSG00000012061 | 203719_at   | U133A |
| 613 Rn30016409 | 2.102 ENSG00000012061 | 203720_s_at | U133A |
| 613 Rn30016409 | 2.102 ENSG00000012061 | 203719_at   | U133A |
| 613 Rn30016409 | 2.102 ENSG00000012061 | 203720_s_at | U133A |
| 613 Rn30016409 | 2.102 ENSG00000012061 | 203719_at   | U133A |
| 613 Rn30016409 | 2.102 ENSG00000012061 | 203720_s_at | U133A |
| 610 Rn30009759 | 2.104 ENSG00000002587 | 205465_x_at | U133A |
| 610 Rn30009759 | 2.104 ENSG00000002587 | 205466_s_at | U133A |
| 609 Rn30001438 | 2.104 ENSG00000154518 | 207507_s_at | U133A |
| 609 Rn30001438 | 2.104 ENSG00000154518 | 207508_at   | U133A |
| 608 Rn30017331 | 2.105 ENSG00000010322 | 201591_s_at | U133A |
| 607 Rn30006511 | 2.106 ENSG00000100519 | 201699_at   | U133A |
| 606 Rn30005349 | 2.107 ENSG00000104388 | 208730_x_at | U133A |
| 606 Rn30005349 | 2.107 ENSG00000104388 | 208731_at   | U133A |
| 606 Rn30005349 | 2.107 ENSG00000104388 | 208732_at   | U133A |
| 606 Rn30005349 | 2.107 ENSG00000104388 | 208733_at   | U133A |
| 606 Rn30005349 | 2.107 ENSG00000104388 | 208734_x_at | U133A |
| 605 R002637_01 | 2.108 ENSG00000115425 | 221142_s_at | U133A |
| 605 R002637_01 | 2.108 ENSG00000115425 | 221142_s_at | U133A |
| 604 Rn30002282 | 2.108 ENSG00000171155 | 219283_at   | U133A |
| 602 Rn30007053 | 2.109 ENSG00000102103 | 207769_s_at | U133A |
| 602 Rn30007053 | 2.109 ENSG00000102103 | 210499_s_at | U133A |
| 602 Rn30007053 | 2.109 ENSG00000102103 | 214527_s_at | U133A |
| 602 Rn30007053 | 2.109 ENSG00000102103 | 207769_s_at | U133A |
| 602 Rn30007053 | 2.109 ENSG00000102103 | 210499_s_at | U133A |
| 602 Rn30007053 | 2.109 ENSG00000102103 | 214527_s_at | U133A |
| 602 Rn30007053 | 2.109 ENSG00000102103 | 207769_s_at | U133A |
| 602 Rn30007053 | 2.109 ENSG00000102103 | 210499_s_at | U133A |
| 602 Rn30007053 | 2.109 ENSG00000102103 | 214527_s_at | U133A |
| 602 Rn30007053 | 2.109 ENSG00000102103 | 207769_s_at | U133A |
| 602 Rn30007053 | 2.109 ENSG00000102103 | 210499_s_at | U133A |
| 602 Rn30007053 | 2.109 ENSG00000102103 | 214527_s_at | U133A |
| 602 Rn30007053 | 2.109 ENSG00000102103 | 207769_s_at | U133A |
| 602 Rn30007053 | 2.109 ENSG00000102103 | 210499_s_at | U133A |
| 602 Rn30007053 | 2.109 ENSG00000102103 | 214527_s_at | U133A |
| 602 Rn30007053 | 2.109 ENSG00000102103 | 207769_s_at | U133A |



|                |                       |             |       |
|----------------|-----------------------|-------------|-------|
| 600 Rn30017243 | 2.119 ENSG00000167165 | 206094_x_at | U133A |
| 600 Rn30017243 | 2.119 ENSG00000167165 | 208596_s_at | U133A |
| 600 Rn30017243 | 2.119 ENSG00000167165 | 215125_s_at | U133A |
| 600 Rn30017243 | 2.119 ENSG00000167165 | 204532_x_at | U133A |
| 600 Rn30017243 | 2.119 ENSG00000167165 | 207126_x_at | U133A |
| 600 Rn30017243 | 2.119 ENSG00000167165 | 206094_x_at | U133A |
| 600 Rn30017243 | 2.119 ENSG00000167165 | 208596_s_at | U133A |
| 600 Rn30017243 | 2.119 ENSG00000167165 | 215125_s_at | U133A |
| 600 Rn30017243 | 2.119 ENSG00000167165 | 204532_x_at | U133A |
| 600 Rn30017243 | 2.119 ENSG00000167165 | 207126_x_at | U133A |
| 600 Rn30017243 | 2.119 ENSG00000167165 | 206094_x_at | U133A |
| 600 Rn30017243 | 2.119 ENSG00000167165 | 208596_s_at | U133A |
| 600 Rn30017243 | 2.119 ENSG00000167165 | 215125_s_at | U133A |
| 600 Rn30017243 | 2.119 ENSG00000167165 | 204532_x_at | U133A |
| 600 Rn30017243 | 2.119 ENSG00000167165 | 207126_x_at | U133A |
| 600 Rn30017243 | 2.119 ENSG00000167165 | 206094_x_at | U133A |
| 600 Rn30017243 | 2.119 ENSG00000167165 | 208596_s_at | U133A |
| 600 Rn30017243 | 2.119 ENSG00000167165 | 215125_s_at | U133A |
| 600 Rn30017243 | 2.119 ENSG00000167165 | 204532_x_at | U133A |
| 600 Rn30017243 | 2.119 ENSG00000167165 | 207126_x_at | U133A |
| 600 Rn30017243 | 2.119 ENSG00000167165 | 206094_x_at | U133A |
| 600 Rn30017243 | 2.119 ENSG00000167165 | 208596_s_at | U133A |
| 600 Rn30017243 | 2.119 ENSG00000167165 | 215125_s_at | U133A |
| 600 Rn30017243 | 2.119 ENSG00000167165 | 204532_x_at | U133A |
| 600 Rn30017243 | 2.119 ENSG00000167165 | 207126_x_at | U133A |
| 597 Rn30013992 | 2.125 ENSG00000106772 | 212805_at   | U133A |
| 597 Rn30013992 | 2.125 ENSG00000106772 | 212806_at   | U133A |
| 596 Rn30007492 | 2.136 ENSG00000104325 | 202447_at   | U133A |
| 595 R000442_01 | 2.138 ENSG00000100292 | 203665_at   | U133A |
| 593 Rn30016881 | 2.145 ENSG00000168268 | 218051_s_at | U133A |
| 593 Rn30016881 | 2.145 ENSG00000168268 | 218051_s_at | U133A |
| 592 Rn30003908 | 2.145 ENSG00000149948 | 208025_s_at | U133A |
| 592 Rn30003908 | 2.145 ENSG00000149948 | 208025_s_at | U133A |
| 591 Rn30000376 | 2.146 ENSG00000112514 | 221488_s_at | U133A |
| 588 Rn30013094 | 2.156 ENSG00000149260 | 205166_at   | U133A |
| 588 Rn30013094 | 2.156 ENSG00000149260 | 221361_at   | U133A |
| 588 Rn30013094 | 2.156 ENSG00000149260 | 205166_at   | U133A |
| 588 Rn30013094 | 2.156 ENSG00000149260 | 221361_at   | U133A |
| 586 Rn30001678 | 2.161 ENSG00000152082 | 212995_x_at | U133A |
| 586 Rn30001678 | 2.161 ENSG00000152082 | 220720_x_at | U133A |
| 584 Rn30017797 | 2.163 ENSG00000125991 | 215257_at   | U133A |
| 584 Rn30017797 | 2.163 ENSG00000125991 | 216032_s_at | U133A |
| 584 Rn30017797 | 2.163 ENSG00000125991 | 215257_at   | U133A |
| 584 Rn30017797 | 2.163 ENSG00000125991 | 216032_s_at | U133A |
| 584 Rn30017797 | 2.163 ENSG00000125991 | 215257_at   | U133A |
| 584 Rn30017797 | 2.163 ENSG00000125991 | 216032_s_at | U133A |
| 584 Rn30017797 | 2.163 ENSG00000125991 | 215257_at   | U133A |
| 584 Rn30017797 | 2.163 ENSG00000125991 | 216032_s_at | U133A |
| 584 Rn30017797 | 2.163 ENSG00000125991 | 215257_at   | U133A |
| 584 Rn30017797 | 2.163 ENSG00000125991 | 216032_s_at | U133A |
| 584 Rn30017797 | 2.163 ENSG00000125991 | 215257_at   | U133A |
| 584 Rn30017797 | 2.163 ENSG00000125991 | 216032_s_at | U133A |
| 584 Rn30017797 | 2.163 ENSG00000125991 | 215257_at   | U133A |
| 584 Rn30017797 | 2.163 ENSG00000125991 | 216032_s_at | U133A |
| 583 Rn30004384 | 2.165 ENSG00000198369 | 212458_at   | U133A |
| 583 Rn30004384 | 2.165 ENSG00000198369 | 212466_at   | U133A |
| 582 Rn30006413 | 2.165 ENSG00000117395 | 201323_at   | U133A |
| 581 Rn30008027 | 2.167 ENSG00000120896 | 209253_at   | U133A |
| 581 Rn30008027 | 2.167 ENSG00000120896 | 207788_s_at | U133A |
| 579 Rn30014503 | 2.173 ENSG00000165637 | 211662_s_at | U133A |
| 579 Rn30014503 | 2.173 ENSG00000165637 | 211662_s_at | U133A |

|                |                       |             |       |
|----------------|-----------------------|-------------|-------|
| 579 Rn30014503 | 2.173 ENSG00000165637 | 211662_s_at | U133A |
| 579 Rn30014503 | 2.173 ENSG00000165637 | 211662_s_at | U133A |
| 579 Rn30014503 | 2.173 ENSG00000165637 | 211662_s_at | U133A |
| 579 Rn30014503 | 2.173 ENSG00000165637 | 211662_s_at | U133A |
| 578 R005172_01 | 2.174 ENSG00000159140 | 201085_s_at | U133A |
| 578 R005172_01 | 2.174 ENSG00000159140 | 201086_x_at | U133A |
| 578 R005172_01 | 2.174 ENSG00000159140 | 213538_at   | U133A |
| 578 R005172_01 | 2.174 ENSG00000159140 | 214988_s_at | U133A |
| 578 R005172_01 | 2.174 ENSG00000159140 | 201085_s_at | U133A |
| 578 R005172_01 | 2.174 ENSG00000159140 | 201086_x_at | U133A |
| 578 R005172_01 | 2.174 ENSG00000159140 | 213538_at   | U133A |
| 578 R005172_01 | 2.174 ENSG00000159140 | 214988_s_at | U133A |
| 578 R005172_01 | 2.174 ENSG00000159140 | 201085_s_at | U133A |
| 578 R005172_01 | 2.174 ENSG00000159140 | 201086_x_at | U133A |
| 578 R005172_01 | 2.174 ENSG00000159140 | 213538_at   | U133A |
| 578 R005172_01 | 2.174 ENSG00000159140 | 214988_s_at | U133A |
| 578 R005172_01 | 2.174 ENSG00000159140 | 201085_s_at | U133A |
| 578 R005172_01 | 2.174 ENSG00000159140 | 201086_x_at | U133A |
| 578 R005172_01 | 2.174 ENSG00000159140 | 213538_at   | U133A |
| 578 R005172_01 | 2.174 ENSG00000159140 | 214988_s_at | U133A |
| 577 R000814_01 | 2.174 ENSG00000118705 | 208689_s_at | U133A |
| 577 R000814_01 | 2.174 ENSG00000118705 | 213399_x_at | U133A |
| 577 R000814_01 | 2.174 ENSG00000118705 | 213491_x_at | U133A |
| 577 R000814_01 | 2.174 ENSG00000118705 | 208689_s_at | U133A |
| 577 R000814_01 | 2.174 ENSG00000118705 | 213399_x_at | U133A |
| 577 R000814_01 | 2.174 ENSG00000118705 | 213491_x_at | U133A |
| 577 R000814_01 | 2.174 ENSG00000118705 | 208689_s_at | U133A |
| 577 R000814_01 | 2.174 ENSG00000118705 | 213399_x_at | U133A |
| 577 R000814_01 | 2.174 ENSG00000118705 | 213491_x_at | U133A |
| 577 R000814_01 | 2.174 ENSG00000118705 | 208689_s_at | U133A |
| 577 R000814_01 | 2.174 ENSG00000118705 | 213399_x_at | U133A |
| 577 R000814_01 | 2.174 ENSG00000118705 | 213491_x_at | U133A |
| 577 R000814_01 | 2.174 ENSG00000118705 | 208689_s_at | U133A |
| 577 R000814_01 | 2.174 ENSG00000118705 | 213399_x_at | U133A |
| 577 R000814_01 | 2.174 ENSG00000118705 | 213491_x_at | U133A |
| 576 Rn30012836 | 2.176 ENSG00000134352 | 204863_s_at | U133A |
| 576 Rn30012836 | 2.176 ENSG00000134352 | 204864_s_at | U133A |
| 576 Rn30012836 | 2.176 ENSG00000134352 | 211000_s_at | U133A |
| 576 Rn30012836 | 2.176 ENSG00000134352 | 204863_s_at | U133A |
| 576 Rn30012836 | 2.176 ENSG00000134352 | 204864_s_at | U133A |
| 576 Rn30012836 | 2.176 ENSG00000134352 | 211000_s_at | U133A |
| 575 Rn30016020 | 2.177 ENSG00000168938 | 204517_at   | U133A |
| 575 Rn30016020 | 2.177 ENSG00000168938 | 204518_s_at | U133A |
| 574 R000431_01 | 2.179 ENSG00000144848 | 220237_at   | U133A |
| 574 R000431_01 | 2.179 ENSG00000144848 | 221492_s_at | U133A |
| 573 Rn30003530 | 2.183 ENSG00000159348 | 202263_at   | U133A |
| 572 Rn30002319 | 2.188 ENSG00000116161 | 201381_x_at | U133A |
| 572 Rn30002319 | 2.188 ENSG00000116161 | 201382_at   | U133A |
| 572 Rn30002319 | 2.188 ENSG00000116161 | 210691_s_at | U133A |
| 572 Rn30002319 | 2.188 ENSG00000116161 | 211761_s_at | U133A |
| 571 R002449_01 | 2.192 ENSG00000117408 | 203546_at   | U133A |
| 568 Rn30000901 | 2.195 ENSG00000083635 | 205134_s_at | U133A |
| 568 Rn30000901 | 2.195 ENSG00000083635 | 205135_s_at | U133A |
| 568 Rn30000901 | 2.195 ENSG00000083635 | 205136_s_at | U133A |
| 567 Rn30011231 | 2.203 ENSG00000164442 | 207980_s_at | U133A |
| 567 Rn30011231 | 2.203 ENSG00000164442 | 209357_at   | U133A |



|                |                       |             |       |
|----------------|-----------------------|-------------|-------|
| 565 Rn30004192 | 2.206 ENSG00000156471 | 201433_s_at | U133A |
| 562 Rn30004188 | 2.213 ENSG00000121067 | 204640_s_at | U133A |
| 562 Rn30004188 | 2.213 ENSG00000121067 | 208927_at   | U133A |
| 561 Rn30014720 | 2.228 ENSG00000124659 | 202495_at   | U133A |
| 560 Rn30003141 | 2.233 ENSG00000103145 | 218537_at   | U133A |
| 560 Rn30003141 | 2.233 ENSG00000103145 | 45714_at    | U133A |
| 560 Rn30003141 | 2.233 ENSG00000103145 | 218537_at   | U133A |
| 560 Rn30003141 | 2.233 ENSG00000103145 | 45714_at    | U133A |
| 559 Rn30011780 | 2.235 ENSG00000101856 | 201120_s_at | U133A |
| 559 Rn30011780 | 2.235 ENSG00000101856 | 201121_s_at | U133A |
| 557 R001070_01 | 2.237 ENSG00000135175 | 207944_at   | U133A |
| 558 R000563_01 | 2.237 ENSG00000116761 | 206085_s_at | U133A |
| 558 R000563_01 | 2.237 ENSG00000116761 | 217127_at   | U133A |
| 558 R000563_01 | 2.237 ENSG00000116761 | 206085_s_at | U133A |
| 558 R000563_01 | 2.237 ENSG00000116761 | 217127_at   | U133A |
| 556 Rn30017624 | 2.239 ENSG00000130985 | 200964_at   | U133A |
| 556 Rn30017624 | 2.239 ENSG00000130985 | 207252_at   | U133A |
| 556 Rn30017624 | 2.239 ENSG00000130985 | 200964_at   | U133A |
| 556 Rn30017624 | 2.239 ENSG00000130985 | 207252_at   | U133A |
| 555 R000683_01 | 2.241 ENSG00000182979 | 202247_s_at | U133A |
| 555 R000683_01 | 2.241 ENSG00000182979 | 211783_s_at | U133A |
| 554 Rn30017682 | 2.242 ENSG00000177697 | 204306_s_at | U133A |
| 554 Rn30017682 | 2.242 ENSG00000177697 | 204306_s_at | U133A |
| 553 R004010_01 | 2.244 ENSG00000167996 | 200748_s_at | U133A |
| 553 R004010_01 | 2.244 ENSG00000167996 | 214211_at   | U133A |
| 553 R004010_01 | 2.244 ENSG00000167996 | 200748_s_at | U133A |
| 553 R004010_01 | 2.244 ENSG00000167996 | 214211_at   | U133A |
| 552 Rn30018094 | 2.247 ENSG00000169814 | 204167_at   | U133A |
| 552 Rn30018094 | 2.247 ENSG00000169814 | 214116_at   | U133A |
| 552 Rn30018094 | 2.247 ENSG00000169814 | 214117_s_at | U133A |
| 551 Rn30005652 | 2.249 ENSG00000012660 | 208788_at   | U133A |
| 551 Rn30005652 | 2.249 ENSG00000012660 | 214153_at   | U133A |
| 551 Rn30005652 | 2.249 ENSG00000012660 | 215082_at   | U133A |
| 550 R001054_01 | 2.25 ENSG00000132688  | 218678_at   | U133A |
| 550 R001054_01 | 2.25 ENSG00000132688  | 218678_at   | U133A |
| 550 R001054_01 | 2.25 ENSG00000132688  | 218678_at   | U133A |
| 547 R004277_01 | 2.256 ENSG00000062716 | 220990_s_at | U133A |
| 546 R001465_01 | 2.256 ENSG00000169228 | 221250_s_at | U133A |
| 546 R001465_01 | 2.256 ENSG00000169228 | 221250_s_at | U133A |
| 546 R001465_01 | 2.256 ENSG00000169228 | 221250_s_at | U133A |
| 545 Rn30018091 | 2.259 ENSG00000124067 | 209401_s_at | U133A |
| 545 Rn30018091 | 2.259 ENSG00000124067 | 209402_s_at | U133A |
| 545 Rn30018091 | 2.259 ENSG00000124067 | 211112_at   | U133A |
| 545 Rn30018091 | 2.259 ENSG00000124067 | 209401_s_at | U133A |
| 545 Rn30018091 | 2.259 ENSG00000124067 | 209402_s_at | U133A |
| 545 Rn30018091 | 2.259 ENSG00000124067 | 211112_at   | U133A |
| 543 Rn30005276 | 2.264 ENSG00000134153 | 217898_at   | U133A |
| 542 Rn30008601 | 2.265 ENSG00000182944 | 210011_s_at | U133A |
| 542 Rn30008601 | 2.265 ENSG00000182944 | 210012_s_at | U133A |
| 542 Rn30008601 | 2.265 ENSG00000182944 | 209214_s_at | U133A |
| 542 Rn30008601 | 2.265 ENSG00000182944 | 211825_s_at | U133A |
| 542 Rn30008601 | 2.265 ENSG00000182944 | 210011_s_at | U133A |
| 542 Rn30008601 | 2.265 ENSG00000182944 | 210012_s_at | U133A |

|                |                       |             |       |
|----------------|-----------------------|-------------|-------|
| 542 Rn30008601 | 2.265 ENSG00000182944 | 209214_s_at | U133A |
| 542 Rn30008601 | 2.265 ENSG00000182944 | 211825_s_at | U133A |
| 542 Rn30008601 | 2.265 ENSG00000182944 | 210011_s_at | U133A |
| 542 Rn30008601 | 2.265 ENSG00000182944 | 210012_s_at | U133A |
| 542 Rn30008601 | 2.265 ENSG00000182944 | 209214_s_at | U133A |
| 542 Rn30008601 | 2.265 ENSG00000182944 | 211825_s_at | U133A |
| 542 Rn30008601 | 2.265 ENSG00000182944 | 210011_s_at | U133A |
| 542 Rn30008601 | 2.265 ENSG00000182944 | 210012_s_at | U133A |
| 542 Rn30008601 | 2.265 ENSG00000182944 | 209214_s_at | U133A |
| 542 Rn30008601 | 2.265 ENSG00000182944 | 211825_s_at | U133A |
| 542 Rn30008601 | 2.265 ENSG00000182944 | 210011_s_at | U133A |
| 542 Rn30008601 | 2.265 ENSG00000182944 | 210012_s_at | U133A |
| 542 Rn30008601 | 2.265 ENSG00000182944 | 209214_s_at | U133A |
| 542 Rn30008601 | 2.265 ENSG00000182944 | 211825_s_at | U133A |
| 541 Rn30012682 | 2.266 ENSG00000054523 | 209234_at   | U133A |
| 541 Rn30012682 | 2.266 ENSG00000054523 | 209234_at   | U133A |
| 541 Rn30012682 | 2.266 ENSG00000054523 | 209234_at   | U133A |
| 541 Rn30012682 | 2.266 ENSG00000054523 | 209234_at   | U133A |
| 537 Rn30026480 | 2.283 ENSG00000168274 | 214469_at   | U133A |
| 537 Rn30026480 | 2.283 ENSG00000168274 | 214469_at   | U133A |
| 537 Rn30026480 | 2.283 ENSG00000168274 | 214469_at   | U133A |
| 537 Rn30026480 | 2.283 ENSG00000168274 | 214469_at   | U133A |
| 537 Rn30026480 | 2.283 ENSG00000168274 | 214469_at   | U133A |
| 536 R000409_01 | 2.284 ENSG00000085662 | 201272_at   | U133A |
| 535 Rn30000856 | 2.288 ENSG00000196367 | 202642_s_at | U133A |
| 535 Rn30000856 | 2.288 ENSG00000196367 | 214908_s_at | U133A |
| 535 Rn30000856 | 2.288 ENSG00000196367 | 220687_at   | U133A |
| 535 Rn30000856 | 2.288 ENSG00000196367 | 202642_s_at | U133A |
| 535 Rn30000856 | 2.288 ENSG00000196367 | 214908_s_at | U133A |
| 535 Rn30000856 | 2.288 ENSG00000196367 | 220687_at   | U133A |
| 535 Rn30000856 | 2.288 ENSG00000196367 | 202642_s_at | U133A |
| 535 Rn30000856 | 2.288 ENSG00000196367 | 220687_at   | U133A |
| 534 Rn30004421 | 2.293 ENSG00000058272 | 201602_s_at | U133A |
| 534 Rn30004421 | 2.293 ENSG00000058272 | 201603_at   | U133A |
| 534 Rn30004421 | 2.293 ENSG00000058272 | 201604_s_at | U133A |
| 534 Rn30004421 | 2.293 ENSG00000058272 | 201602_s_at | U133A |
| 534 Rn30004421 | 2.293 ENSG00000058272 | 201603_at   | U133A |
| 534 Rn30004421 | 2.293 ENSG00000058272 | 201604_s_at | U133A |
| 534 Rn30004421 | 2.293 ENSG00000058272 | 201602_s_at | U133A |
| 534 Rn30004421 | 2.293 ENSG00000058272 | 201603_at   | U133A |
| 534 Rn30004421 | 2.293 ENSG00000058272 | 201604_s_at | U133A |
| 534 Rn30004421 | 2.293 ENSG00000058272 | 201602_s_at | U133A |
| 534 Rn30004421 | 2.293 ENSG00000058272 | 201603_at   | U133A |
| 534 Rn30004421 | 2.293 ENSG00000058272 | 201604_s_at | U133A |
| 531 Rn30001973 | 2.307 ENSG00000177707 | 213325_at   | U133A |
| 531 Rn30001973 | 2.307 ENSG00000177707 | 222167_at   | U133A |
| 531 Rn30001973 | 2.307 ENSG00000177707 | 213325_at   | U133A |
| 531 Rn30001973 | 2.307 ENSG00000177707 | 222167_at   | U133A |
| 531 Rn30001973 | 2.307 ENSG00000177707 | 213325_at   | U133A |
| 531 Rn30001973 | 2.307 ENSG00000177707 | 222167_at   | U133A |
| 531 Rn30001973 | 2.307 ENSG00000177707 | 213325_at   | U133A |
| 531 Rn30001973 | 2.307 ENSG00000177707 | 222167_at   | U133A |
| 529 Rn30004636 | 2.315 ENSG00000102054 | 201092_at   | U133A |

|                |                       |             |       |
|----------------|-----------------------|-------------|-------|
| 528 R000896_01 | 2.315 ENSG00000156709 | 205512_s_at | U133A |
| 528 R000896_01 | 2.315 ENSG00000156709 | 216761_at   | U133A |
| 528 R000896_01 | 2.315 ENSG00000156709 | 205512_s_at | U133A |
| 528 R000896_01 | 2.315 ENSG00000156709 | 216761_at   | U133A |
| 528 R000896_01 | 2.315 ENSG00000156709 | 205512_s_at | U133A |
| 528 R000896_01 | 2.315 ENSG00000156709 | 216761_at   | U133A |
| 527 Rn30008956 | 2.318 ENSG00000170421 | 209008_x_at | U133A |
| 526 Rn30006598 | 2.319 ENSG00000149311 | 208442_s_at | U133A |
| 526 Rn30006598 | 2.319 ENSG00000149311 | 210858_x_at | U133A |
| 526 Rn30006598 | 2.319 ENSG00000149311 | 212672_at   | U133A |
| 526 Rn30006598 | 2.319 ENSG00000149311 | 208442_s_at | U133A |
| 526 Rn30006598 | 2.319 ENSG00000149311 | 210858_x_at | U133A |
| 526 Rn30006598 | 2.319 ENSG00000149311 | 212672_at   | U133A |
| 525 R000203_01 | 2.32 ENSG00000005893  | 200821_at   | U133A |
| 525 R000203_01 | 2.32 ENSG00000005893  | 203041_s_at | U133A |
| 525 R000203_01 | 2.32 ENSG00000005893  | 203042_at   | U133A |
| 525 R000203_01 | 2.32 ENSG00000005893  | 200821_at   | U133A |
| 525 R000203_01 | 2.32 ENSG00000005893  | 203041_s_at | U133A |
| 525 R000203_01 | 2.32 ENSG00000005893  | 203042_at   | U133A |
| 523 Rn30013413 | 2.325 ENSG00000185024 | 203754_s_at | U133A |
| 523 Rn30013413 | 2.325 ENSG00000185024 | 215676_at   | U133A |
| 523 Rn30013413 | 2.325 ENSG00000185024 | 215677_s_at | U133A |
| 523 Rn30013413 | 2.325 ENSG00000185024 | 203754_s_at | U133A |
| 523 Rn30013413 | 2.325 ENSG00000185024 | 203754_s_at | U133A |
| 523 Rn30013413 | 2.325 ENSG00000185024 | 215676_at   | U133A |
| 523 Rn30013413 | 2.325 ENSG00000185024 | 215677_s_at | U133A |
| 521 Rn30022118 | 2.339 ENSG00000111845 | 218886_at   | U133A |
| 521 Rn30022118 | 2.339 ENSG00000111845 | 218886_at   | U133A |
| 520 Rn30011075 | 2.342 ENSG00000141458 | 202679_at   | U133A |
| 520 Rn30011075 | 2.342 ENSG00000141458 | 217584_at   | U133A |
| 519 Rn30006105 | 2.348 ENSG00000077232 | 221781_s_at | U133A |
| 519 Rn30006105 | 2.348 ENSG00000077232 | 221782_at   | U133A |
| 519 Rn30006105 | 2.348 ENSG00000077232 | 221781_s_at | U133A |
| 519 Rn30006105 | 2.348 ENSG00000077232 | 221782_at   | U133A |
| 519 Rn30006105 | 2.348 ENSG00000077232 | 221781_s_at | U133A |
| 519 Rn30006105 | 2.348 ENSG00000077232 | 221782_at   | U133A |
| 519 Rn30006105 | 2.348 ENSG00000077232 | 221781_s_at | U133A |
| 519 Rn30006105 | 2.348 ENSG00000077232 | 221782_at   | U133A |
| 519 Rn30006105 | 2.348 ENSG00000077232 | 221781_s_at | U133A |
| 519 Rn30006105 | 2.348 ENSG00000077232 | 221782_at   | U133A |
| 518 Rn30011749 | 2.349 ENSG00000125304 | 201078_at   | U133A |
| 516 Rn30018161 | 2.354 ENSG00000165458 | 201598_s_at | U133A |
| 516 Rn30018161 | 2.354 ENSG00000165458 | 201598_s_at | U133A |
| 516 Rn30018161 | 2.354 ENSG00000165458 | 201598_s_at | U133A |
| 514 Rn30007022 | 2.364 ENSG00000181830 | 218485_s_at | U133A |
| 512 Rn30017365 | 2.365 ENSG00000148824 | 212767_at   | U133A |
| 512 Rn30017365 | 2.365 ENSG00000148824 | 212767_at   | U133A |
| 511 Rn30005621 | 2.369 ENSG00000001084 | 202922_at   | U133A |
| 511 Rn30005621 | 2.369 ENSG00000001084 | 202923_s_at | U133A |
| 510 Rn30003579 | 2.37 ENSG00000070961  | 209281_s_at | U133A |
| 510 Rn30003579 | 2.37 ENSG00000070961  | 212930_at   | U133A |

|                |       |                 |             |       |
|----------------|-------|-----------------|-------------|-------|
| 510 Rn30003579 | 2.37  | ENSG00000070961 | 215716_s_at | U133A |
| 510 Rn30003579 | 2.37  | ENSG00000070961 | 209281_s_at | U133A |
| 510 Rn30003579 | 2.37  | ENSG00000070961 | 212930_at   | U133A |
| 510 Rn30003579 | 2.37  | ENSG00000070961 | 215716_s_at | U133A |
| 510 Rn30003579 | 2.37  | ENSG00000070961 | 209281_s_at | U133A |
| 510 Rn30003579 | 2.37  | ENSG00000070961 | 215716_s_at | U133A |
| 509 Rn30002875 | 2.375 | ENSG00000156298 | 202242_at   | U133A |
| 505 Rn30007009 | 2.392 | ENSG00000112237 | 201955_at   | U133A |
| 505 Rn30007009 | 2.392 | ENSG00000112237 | 201955_at   | U133A |
| 504 Rn30021586 | 2.398 | ENSG00000065665 | 219499_at   | U133A |
| 504 Rn30021586 | 2.398 | ENSG00000065665 | 219499_at   | U133A |
| 504 Rn30021586 | 2.398 | ENSG00000065665 | 219499_at   | U133A |
| 503 Rn30009911 | 2.399 | ENSG00000035403 | 200930_s_at | U133A |
| 503 Rn30009911 | 2.399 | ENSG00000035403 | 200931_s_at | U133A |
| 503 Rn30009911 | 2.399 | ENSG00000035403 | 200930_s_at | U133A |
| 503 Rn30009911 | 2.399 | ENSG00000035403 | 200931_s_at | U133A |
| 503 Rn30009911 | 2.399 | ENSG00000035403 | 200930_s_at | U133A |
| 503 Rn30009911 | 2.399 | ENSG00000035403 | 200931_s_at | U133A |
| 503 Rn30009911 | 2.399 | ENSG00000035403 | 200930_s_at | U133A |
| 503 Rn30009911 | 2.399 | ENSG00000035403 | 200931_s_at | U133A |
| 503 Rn30009911 | 2.399 | ENSG00000035403 | 200930_s_at | U133A |
| 503 Rn30009911 | 2.399 | ENSG00000035403 | 200931_s_at | U133A |
| 501 Rn30010228 | 2.406 | ENSG00000029993 | 203744_at   | U133A |
| 500 R005330_01 | 2.406 | ENSG00000035687 | 221761_at   | U133A |
| 497 Rn30009528 | 2.419 | ENSG00000100106 | 202795_x_at | U133A |
| 497 Rn30009528 | 2.419 | ENSG00000100106 | 210276_s_at | U133A |
| 497 Rn30009528 | 2.419 | ENSG00000100106 | 216210_x_at | U133A |
| 497 Rn30009528 | 2.419 | ENSG00000100106 | 202795_x_at | U133A |
| 497 Rn30009528 | 2.419 | ENSG00000100106 | 210276_s_at | U133A |
| 497 Rn30009528 | 2.419 | ENSG00000100106 | 216210_x_at | U133A |
| 497 Rn30009528 | 2.419 | ENSG00000100106 | 202795_x_at | U133A |
| 497 Rn30009528 | 2.419 | ENSG00000100106 | 210276_s_at | U133A |
| 497 Rn30009528 | 2.419 | ENSG00000100106 | 216210_x_at | U133A |
| 490 Rn30001281 | 2.439 | ENSG00000106397 | 202185_at   | U133A |
| 489 Rn30001436 | 2.44  | ENSG00000156261 | 200873_s_at | U133A |
| 489 Rn30001436 | 2.44  | ENSG00000156261 | 210436_at   | U133A |
| 487 Rn30003426 | 2.45  | ENSG00000182220 | 201443_s_at | U133A |
| 487 Rn30003426 | 2.45  | ENSG00000182220 | 201444_s_at | U133A |
| 487 Rn30003426 | 2.45  | ENSG00000182220 | 201443_s_at | U133A |
| 487 Rn30003426 | 2.45  | ENSG00000182220 | 201444_s_at | U133A |
| 485 Rn30012752 | 2.457 | ENSG00000197056 | 220206_at   | U133A |
| 485 Rn30012752 | 2.457 | ENSG00000197056 | 220206_at   | U133A |
| 484 Rn30011427 | 2.461 | ENSG00000159593 | 202268_s_at | U133A |
| 484 Rn30011427 | 2.461 | ENSG00000159593 | 202268_s_at | U133A |
| 483 Rn30002023 | 2.466 | ENSG00000065485 | 203857_s_at | U133A |
| 483 Rn30002023 | 2.466 | ENSG00000065485 | 203857_s_at | U133A |
| 482 Rn30007696 | 2.475 | ENSG00000182872 | 208984_x_at | U133A |
| 482 Rn30007696 | 2.475 | ENSG00000182872 | 215089_s_at | U133A |
| 482 Rn30007696 | 2.475 | ENSG00000182872 | 217221_x_at | U133A |
| 482 Rn30007696 | 2.475 | ENSG00000182872 | 208984_x_at | U133A |
| 482 Rn30007696 | 2.475 | ENSG00000182872 | 215089_s_at | U133A |
| 482 Rn30007696 | 2.475 | ENSG00000182872 | 217221_x_at | U133A |
| 482 Rn30007696 | 2.475 | ENSG00000182872 | 208984_x_at | U133A |
| 482 Rn30007696 | 2.475 | ENSG00000182872 | 215089_s_at | U133A |
| 482 Rn30007696 | 2.475 | ENSG00000182872 | 217221_x_at | U133A |

|                |                       |             |       |
|----------------|-----------------------|-------------|-------|
| 482 Rn30007696 | 2.475 ENSG00000182872 | 208984_x_at | U133A |
| 482 Rn30007696 | 2.475 ENSG00000182872 | 215089_s_at | U133A |
| 482 Rn30007696 | 2.475 ENSG00000182872 | 217221_x_at | U133A |
| 480 R003137_01 | 2.512 ENSG00000111530 | 208838_at   | U133A |
| 480 R003137_01 | 2.512 ENSG00000111530 | 208839_s_at | U133A |
| 480 R003137_01 | 2.512 ENSG00000111530 | 208838_at   | U133A |
| 480 R003137_01 | 2.512 ENSG00000111530 | 208839_s_at | U133A |
| 479 Rn30008905 | 2.516 ENSG00000102050 | 203456_at   | U133A |
| 476 Rn30005901 | 2.556 ENSG00000170634 | 206833_s_at | U133A |
| 474 R004472_01 | 2.576 ENSG00000123080 | 204159_at   | U133A |
| 474 R004472_01 | 2.576 ENSG00000123080 | 211792_s_at | U133A |
| 473 R003271_01 | 2.58 ENSG00000133112  | 211943_x_at | U133A |
| 473 R003271_01 | 2.58 ENSG00000133112  | 212869_x_at | U133A |
| 473 R003271_01 | 2.58 ENSG00000133112  | 214327_x_at | U133A |
| 473 R003271_01 | 2.58 ENSG00000133112  | 216520_s_at | U133A |
| 473 R003271_01 | 2.58 ENSG00000133112  | 211943_x_at | U133A |
| 473 R003271_01 | 2.58 ENSG00000133112  | 212869_x_at | U133A |
| 473 R003271_01 | 2.58 ENSG00000133112  | 214327_x_at | U133A |
| 473 R003271_01 | 2.58 ENSG00000133112  | 216520_s_at | U133A |
| 473 R003271_01 | 2.58 ENSG00000133112  | 211943_x_at | U133A |
| 473 R003271_01 | 2.58 ENSG00000133112  | 212869_x_at | U133A |
| 473 R003271_01 | 2.58 ENSG00000133112  | 214327_x_at | U133A |
| 473 R003271_01 | 2.58 ENSG00000133112  | 216520_s_at | U133A |
| 473 R003271_01 | 2.58 ENSG00000133112  | 211943_x_at | U133A |
| 473 R003271_01 | 2.58 ENSG00000133112  | 212869_x_at | U133A |
| 473 R003271_01 | 2.58 ENSG00000133112  | 214327_x_at | U133A |
| 473 R003271_01 | 2.58 ENSG00000133112  | 216520_s_at | U133A |
| 472 R002958_01 | 2.581 ENSG00000146425 | 201999_s_at | U133A |
| 470 R004061_01 | 2.596 ENSG00000185338 | 209999_x_at | U133A |
| 470 R004061_01 | 2.596 ENSG00000185338 | 210001_s_at | U133A |
| 469 Rn30010353 | 2.601 ENSG00000123200 | 209851_at   | U133A |
| 469 Rn30010353 | 2.601 ENSG00000123200 | 212402_at   | U133A |
| 469 Rn30010353 | 2.601 ENSG00000123200 | 209851_at   | U133A |
| 469 Rn30010353 | 2.601 ENSG00000123200 | 212402_at   | U133A |
| 469 Rn30010353 | 2.601 ENSG00000123200 | 209851_at   | U133A |
| 469 Rn30010353 | 2.601 ENSG00000123200 | 212402_at   | U133A |
| 469 Rn30010353 | 2.601 ENSG00000123200 | 209851_at   | U133A |
| 469 Rn30010353 | 2.601 ENSG00000123200 | 212402_at   | U133A |
| 466 Rn30003454 | 2.614 ENSG00000187109 | 204528_s_at | U133A |
| 466 Rn30003454 | 2.614 ENSG00000187109 | 208752_x_at | U133A |
| 466 Rn30003454 | 2.614 ENSG00000187109 | 208753_s_at | U133A |
| 466 Rn30003454 | 2.614 ENSG00000187109 | 208754_s_at | U133A |
| 466 Rn30003454 | 2.614 ENSG00000187109 | 212967_x_at | U133A |
| 466 Rn30003454 | 2.614 ENSG00000187109 | 213864_s_at | U133A |
| 466 Rn30003454 | 2.614 ENSG00000187109 | 204528_s_at | U133A |
| 466 Rn30003454 | 2.614 ENSG00000187109 | 208752_x_at | U133A |
| 466 Rn30003454 | 2.614 ENSG00000187109 | 208753_s_at | U133A |
| 466 Rn30003454 | 2.614 ENSG00000187109 | 208754_s_at | U133A |
| 466 Rn30003454 | 2.614 ENSG00000187109 | 212967_x_at | U133A |
| 466 Rn30003454 | 2.614 ENSG00000187109 | 213864_s_at | U133A |
| 464 Rn30013101 | 2.617 ENSG00000118508 | 204214_s_at | U133A |
| 463 R003377_01 | 2.619 ENSG00000100664 | 208290_s_at | U133A |
| 463 R003377_01 | 2.619 ENSG00000100664 | 208705_s_at | U133A |

|                |                       |             |       |
|----------------|-----------------------|-------------|-------|
| 463 R003377_01 | 2.619 ENSG00000100664 | 208706_s_at | U133A |
| 463 R003377_01 | 2.619 ENSG00000100664 | 208707_at   | U133A |
| 463 R003377_01 | 2.619 ENSG00000100664 | 208708_x_at | U133A |
| 463 R003377_01 | 2.619 ENSG00000100664 | 208290_s_at | U133A |
| 463 R003377_01 | 2.619 ENSG00000100664 | 208705_s_at | U133A |
| 463 R003377_01 | 2.619 ENSG00000100664 | 208706_s_at | U133A |
| 463 R003377_01 | 2.619 ENSG00000100664 | 208707_at   | U133A |
| 463 R003377_01 | 2.619 ENSG00000100664 | 208708_x_at | U133A |
| 462 Rn30008533 | 2.63 ENSG00000164823  | 204024_at   | U133A |
| 461 Rn30007374 | 2.633 ENSG00000197157 | 201622_at   | U133A |
| 461 Rn30007374 | 2.633 ENSG00000197157 | 210109_at   | U133A |
| 458 Rn30016428 | 2.643 ENSG00000044090 | 203558_at   | U133A |
| 458 Rn30016428 | 2.643 ENSG00000044090 | 36084_at    | U133A |
| 457 Rn30019599 | 2.645 ENSG00000125877 | 209171_at   | U133A |
| 455 Rn30013768 | 2.649 ENSG00000197081 | 201392_s_at | U133A |
| 455 Rn30013768 | 2.649 ENSG00000197081 | 201393_s_at | U133A |
| 454 Rn30007723 | 2.653 ENSG00000128534 | 219119_at   | U133A |
| 453 Rn30005891 | 2.662 ENSG00000099964 | 212167_s_at | U133A |
| 453 Rn30005891 | 2.662 ENSG00000099964 | 217871_s_at | U133A |
| 452 R002546_01 | 2.677 ENSG00000141959 | 201102_s_at | U133A |
| 452 R002546_01 | 2.677 ENSG00000141959 | 211065_x_at | U133A |
| 452 R002546_01 | 2.677 ENSG00000141959 | 201102_s_at | U133A |
| 452 R002546_01 | 2.677 ENSG00000141959 | 211065_x_at | U133A |
| 451 Rn30016160 | 2.692 ENSG00000007944 | 220319_s_at | U133A |
| 451 Rn30016160 | 2.692 ENSG00000007944 | 220319_s_at | U133A |
| 451 Rn30016160 | 2.692 ENSG00000007944 | 220319_s_at | U133A |
| 451 Rn30016160 | 2.692 ENSG00000007944 | 220319_s_at | U133A |
| 450 Rn30025308 | 2.699 ENSG00000078140 | 202346_at   | U133A |
| 450 Rn30025308 | 2.699 ENSG00000078140 | 202347_s_at | U133A |
| 450 Rn30025308 | 2.699 ENSG00000078140 | 202346_at   | U133A |
| 450 Rn30025308 | 2.699 ENSG00000078140 | 202347_s_at | U133A |
| 448 Rn30004634 | 2.718 ENSG00000046647 | 219252_s_at | U133A |
| 447 Rn30008869 | 2.724 ENSG00000136153 | 202674_s_at | U133A |
| 447 Rn30008869 | 2.724 ENSG00000136153 | 202674_s_at | U133A |
| 447 Rn30008869 | 2.724 ENSG00000136153 | 202674_s_at | U133A |
| 447 Rn30008869 | 2.724 ENSG00000136153 | 202674_s_at | U133A |
| 447 Rn30008869 | 2.724 ENSG00000136153 | 202674_s_at | U133A |
| 447 Rn30008869 | 2.724 ENSG00000136153 | 202674_s_at | U133A |
| 447 Rn30008869 | 2.724 ENSG00000136153 | 202674_s_at | U133A |
| 447 Rn30008869 | 2.724 ENSG00000136153 | 202674_s_at | U133A |
| 447 Rn30008869 | 2.724 ENSG00000136153 | 202674_s_at | U133A |
| 447 Rn30008869 | 2.724 ENSG00000136153 | 202674_s_at | U133A |
| 444 Rn30026847 | 2.738 ENSG00000184990 | 203489_at   | U133A |
| 444 Rn30026847 | 2.738 ENSG00000184990 | 210792_x_at | U133A |
| 444 Rn30026847 | 2.738 ENSG00000184990 | 222030_at   | U133A |
| 444 Rn30026847 | 2.738 ENSG00000184990 | 203489_at   | U133A |
| 444 Rn30026847 | 2.738 ENSG00000184990 | 210792_x_at | U133A |
| 444 Rn30026847 | 2.738 ENSG00000184990 | 222030_at   | U133A |
| 442 Rn30008705 | 2.742 ENSG00000118939 | 204616_at   | U133A |
| 443 Rn30002719 | 2.742 ENSG00000072506 | 202282_at   | U133A |
| 441 R004439_01 | 2.744 ENSG00000005020 | 204362_at   | U133A |
| 441 R004439_01 | 2.744 ENSG00000005020 | 204361_s_at | U133A |
| 441 R004439_01 | 2.744 ENSG00000005020 | 216899_s_at | U133A |
| 440 Rn30001252 | 2.753 ENSG00000186815 | 217914_at   | U133A |
| 440 Rn30001252 | 2.753 ENSG00000186815 | 217914_at   | U133A |



|                |                       |             |       |
|----------------|-----------------------|-------------|-------|
| 421 Rn30007956 | 2.825 ENSG00000130635 | 212488_at   | U133A |
| 421 Rn30007956 | 2.825 ENSG00000130635 | 212489_at   | U133A |
| 421 Rn30007956 | 2.825 ENSG00000130635 | 203325_s_at | U133A |
| 421 Rn30007956 | 2.825 ENSG00000130635 | 203326_x_at | U133A |
| 421 Rn30007956 | 2.825 ENSG00000130635 | 212488_at   | U133A |
| 421 Rn30007956 | 2.825 ENSG00000130635 | 212489_at   | U133A |
| 420 Rn30002054 | 2.837 ENSG00000152795 | 201993_x_at | U133A |
| 420 Rn30002054 | 2.837 ENSG00000152795 | 209067_s_at | U133A |
| 420 Rn30002054 | 2.837 ENSG00000152795 | 209068_at   | U133A |
| 420 Rn30002054 | 2.837 ENSG00000152795 | 212454_x_at | U133A |
| 420 Rn30002054 | 2.837 ENSG00000152795 | 201993_x_at | U133A |
| 420 Rn30002054 | 2.837 ENSG00000152795 | 209067_s_at | U133A |
| 420 Rn30002054 | 2.837 ENSG00000152795 | 209068_at   | U133A |
| 420 Rn30002054 | 2.837 ENSG00000152795 | 212454_x_at | U133A |
| 420 Rn30002054 | 2.837 ENSG00000152795 | 201993_x_at | U133A |
| 420 Rn30002054 | 2.837 ENSG00000152795 | 209067_s_at | U133A |
| 420 Rn30002054 | 2.837 ENSG00000152795 | 209068_at   | U133A |
| 420 Rn30002054 | 2.837 ENSG00000152795 | 212454_x_at | U133A |
| 417 Rn30020152 | 2.851 ENSG00000157566 | 201348_at   | U133A |
| 417 Rn30020152 | 2.851 ENSG00000157566 | 214091_s_at | U133A |
| 417 Rn30020152 | 2.851 ENSG00000157566 | 201348_at   | U133A |
| 417 Rn30020152 | 2.851 ENSG00000157566 | 214091_s_at | U133A |
| 416 Rn30010173 | 2.857 ENSG00000155984 | 220314_at   | U133A |
| 415 Rn30009885 | 2.857 ENSG00000139793 | 203640_at   | U133A |
| 415 Rn30009885 | 2.857 ENSG00000139793 | 205017_s_at | U133A |
| 415 Rn30009885 | 2.857 ENSG00000139793 | 205018_s_at | U133A |
| 415 Rn30009885 | 2.857 ENSG00000139793 | 203640_at   | U133A |
| 415 Rn30009885 | 2.857 ENSG00000139793 | 205017_s_at | U133A |
| 415 Rn30009885 | 2.857 ENSG00000139793 | 205018_s_at | U133A |
| 415 Rn30009885 | 2.857 ENSG00000139793 | 203640_at   | U133A |
| 415 Rn30009885 | 2.857 ENSG00000139793 | 205017_s_at | U133A |
| 415 Rn30009885 | 2.857 ENSG00000139793 | 205018_s_at | U133A |
| 413 Rn30002067 | 2.858 ENSG00000131171 | 201311_s_at | U133A |
| 413 Rn30002067 | 2.858 ENSG00000131171 | 201312_s_at | U133A |
| 412 Rn30001003 | 2.866 ENSG00000135090 | 220761_s_at | U133A |
| 412 Rn30001003 | 2.866 ENSG00000135090 | 221508_at   | U133A |
| 412 Rn30001003 | 2.866 ENSG00000135090 | 220761_s_at | U133A |
| 412 Rn30001003 | 2.866 ENSG00000135090 | 221508_at   | U133A |
| 412 Rn30001003 | 2.866 ENSG00000135090 | 220761_s_at | U133A |
| 412 Rn30001003 | 2.866 ENSG00000135090 | 221508_at   | U133A |
| 412 Rn30001003 | 2.866 ENSG00000135090 | 220761_s_at | U133A |
| 412 Rn30001003 | 2.866 ENSG00000135090 | 221508_at   | U133A |
| 412 Rn30001003 | 2.866 ENSG00000135090 | 220761_s_at | U133A |
| 412 Rn30001003 | 2.866 ENSG00000135090 | 221508_at   | U133A |
| 411 R002518_01 | 2.872 ENSG00000003436 | 215447_at   | U133A |
| 411 R002518_01 | 2.872 ENSG00000003436 | 209676_at   | U133A |
| 411 R002518_01 | 2.872 ENSG00000003436 | 214378_at   | U133A |
| 411 R002518_01 | 2.872 ENSG00000003436 | 210664_s_at | U133A |
| 411 R002518_01 | 2.872 ENSG00000003436 | 210665_at   | U133A |
| 411 R002518_01 | 2.872 ENSG00000003436 | 215447_at   | U133A |
| 411 R002518_01 | 2.872 ENSG00000003436 | 209676_at   | U133A |
| 411 R002518_01 | 2.872 ENSG00000003436 | 214378_at   | U133A |
| 411 R002518_01 | 2.872 ENSG00000003436 | 210664_s_at | U133A |



|                |       |                 |             |       |
|----------------|-------|-----------------|-------------|-------|
| 411 R002518_01 | 2.872 | ENSG00000003436 | 210665_at   | U133A |
| 409 Rn30017911 | 2.88  | ENSG00000156453 | 203918_at   | U133A |
| 409 Rn30017911 | 2.88  | ENSG00000156453 | 215277_at   | U133A |
| 409 Rn30017911 | 2.88  | ENSG00000156453 | 203918_at   | U133A |
| 409 Rn30017911 | 2.88  | ENSG00000156453 | 215277_at   | U133A |
| 408 Rn30023742 | 2.903 | ENSG00000181104 | 203989_x_at | U133A |
| 407 Rn30017188 | 2.908 | ENSG00000167173 | 204494_s_at | U133A |
| 407 Rn30017188 | 2.908 | ENSG00000167173 | 204495_s_at | U133A |
| 407 Rn30017188 | 2.908 | ENSG00000167173 | 215087_at   | U133A |
| 407 Rn30017188 | 2.908 | ENSG00000167173 | 204494_s_at | U133A |
| 407 Rn30017188 | 2.908 | ENSG00000167173 | 204495_s_at | U133A |
| 407 Rn30017188 | 2.908 | ENSG00000167173 | 215087_at   | U133A |
| 407 Rn30017188 | 2.908 | ENSG00000167173 | 204494_s_at | U133A |
| 407 Rn30017188 | 2.908 | ENSG00000167173 | 204495_s_at | U133A |
| 407 Rn30017188 | 2.908 | ENSG00000167173 | 215087_at   | U133A |
| 407 Rn30017188 | 2.908 | ENSG00000167173 | 204494_s_at | U133A |
| 407 Rn30017188 | 2.908 | ENSG00000167173 | 204495_s_at | U133A |
| 407 Rn30017188 | 2.908 | ENSG00000167173 | 215087_at   | U133A |
| 405 R002096_01 | 2.927 | ENSG00000136854 | 202260_s_at | U133A |
| 405 R002096_01 | 2.927 | ENSG00000136854 | 202260_s_at | U133A |
| 404 Rn30020543 | 2.96  | ENSG00000175931 | 218141_at   | U133A |
| 401 Rn30014702 | 2.978 | ENSG00000172201 | 209291_at   | U133A |
| 401 Rn30014702 | 2.978 | ENSG00000172201 | 209292_at   | U133A |
| 401 Rn30014702 | 2.978 | ENSG00000172201 | 209293_x_at | U133A |
| 400 Rn30016827 | 2.983 | ENSG00000039560 | 202052_s_at | U133A |
| 399 Rn30003993 | 2.989 | ENSG00000087586 | 204092_s_at | U133A |
| 399 Rn30003993 | 2.989 | ENSG00000087586 | 208079_s_at | U133A |
| 399 Rn30003993 | 2.989 | ENSG00000087586 | 208080_at   | U133A |
| 399 Rn30003993 | 2.989 | ENSG00000087586 | 204092_s_at | U133A |
| 399 Rn30003993 | 2.989 | ENSG00000087586 | 208079_s_at | U133A |
| 399 Rn30003993 | 2.989 | ENSG00000087586 | 208080_at   | U133A |
| 397 R002231_01 | 3.02  | ENSG00000181019 | 201467_s_at | U133A |
| 397 R002231_01 | 3.02  | ENSG00000181019 | 201468_s_at | U133A |
| 397 R002231_01 | 3.02  | ENSG00000181019 | 210519_s_at | U133A |
| 394 Rn30000765 | 3.045 | ENSG00000169902 | 204140_at   | U133A |
| 393 Rn30020904 | 3.061 | ENSG00000124496 | 216176_at   | U133A |
| 393 Rn30020904 | 3.061 | ENSG00000124496 | 216749_at   | U133A |
| 393 Rn30020904 | 3.061 | ENSG00000124496 | 216176_at   | U133A |
| 393 Rn30020904 | 3.061 | ENSG00000124496 | 216749_at   | U133A |
| 393 Rn30020904 | 3.061 | ENSG00000124496 | 216176_at   | U133A |
| 393 Rn30020904 | 3.061 | ENSG00000124496 | 216749_at   | U133A |
| 393 Rn30020904 | 3.061 | ENSG00000124496 | 216176_at   | U133A |
| 393 Rn30020904 | 3.061 | ENSG00000124496 | 216749_at   | U133A |
| 393 Rn30020904 | 3.061 | ENSG00000124496 | 216176_at   | U133A |
| 393 Rn30020904 | 3.061 | ENSG00000124496 | 216749_at   | U133A |
| 393 Rn30020904 | 3.061 | ENSG00000124496 | 216176_at   | U133A |
| 393 Rn30020904 | 3.061 | ENSG00000124496 | 216749_at   | U133A |
| 393 Rn30020904 | 3.061 | ENSG00000124496 | 216176_at   | U133A |
| 393 Rn30020904 | 3.061 | ENSG00000124496 | 216749_at   | U133A |
| 392 Rn30005344 | 3.082 | ENSG00000125844 | 201203_s_at | U133A |
| 392 Rn30005344 | 3.082 | ENSG00000125844 | 201204_s_at | U133A |
| 392 Rn30005344 | 3.082 | ENSG00000125844 | 201206_s_at | U133A |
| 392 Rn30005344 | 3.082 | ENSG00000125844 | 213973_at   | U133A |
| 392 Rn30005344 | 3.082 | ENSG00000125844 | 201203_s_at | U133A |
| 392 Rn30005344 | 3.082 | ENSG00000125844 | 201204_s_at | U133A |
| 392 Rn30005344 | 3.082 | ENSG00000125844 | 201206_s_at | U133A |
| 392 Rn30005344 | 3.082 | ENSG00000125844 | 213973_at   | U133A |
| 391 Rn30006170 | 3.087 | ENSG00000186480 | 201625_s_at | U133A |

|                |                       |             |       |
|----------------|-----------------------|-------------|-------|
| 391 Rn30006170 | 3.087 ENSG00000186480 | 201626_at   | U133A |
| 391 Rn30006170 | 3.087 ENSG00000186480 | 201627_s_at | U133A |
| 391 Rn30006170 | 3.087 ENSG00000186480 | 201625_s_at | U133A |
| 391 Rn30006170 | 3.087 ENSG00000186480 | 201626_at   | U133A |
| 391 Rn30006170 | 3.087 ENSG00000186480 | 201627_s_at | U133A |
| 391 Rn30006170 | 3.087 ENSG00000186480 | 201625_s_at | U133A |
| 391 Rn30006170 | 3.087 ENSG00000186480 | 201626_at   | U133A |
| 391 Rn30006170 | 3.087 ENSG00000186480 | 201627_s_at | U133A |
| 390 R000985_01 | 3.095 ENSG00000117399 | 202870_s_at | U133A |
| 389 R000424_01 | 3.105 ENSG00000085117 | 203904_x_at | U133A |
| 389 R000424_01 | 3.105 ENSG00000085117 | 203904_x_at | U133A |
| 388 Rn30025821 | 3.106 ENSG00000125257 | 203196_at   | U133A |
| 388 Rn30025821 | 3.106 ENSG00000125257 | 203196_at   | U133A |
| 386 Rn30006090 | 3.115 ENSG00000094631 | 206846_s_at | U133A |
| 386 Rn30006090 | 3.115 ENSG00000094631 | 211722_s_at | U133A |
| 386 Rn30006090 | 3.115 ENSG00000094631 | 216224_s_at | U133A |
| 385 Rn30024806 | 3.121 ENSG00000107745 | 216903_s_at | U133A |
| 385 Rn30024806 | 3.121 ENSG00000107745 | 216903_s_at | U133A |
| 385 Rn30024806 | 3.121 ENSG00000107745 | 216903_s_at | U133A |
| 384 Rn30006537 | 3.141 ENSG00000115738 | 201565_s_at | U133A |
| 384 Rn30006537 | 3.141 ENSG00000115738 | 201566_x_at | U133A |
| 384 Rn30006537 | 3.141 ENSG00000115738 | 213931_at   | U133A |
| 381 Rn30006077 | 3.185 ENSG00000123342 | 204574_s_at | U133A |
| 381 Rn30006077 | 3.185 ENSG00000123342 | 204575_s_at | U133A |
| 381 Rn30006077 | 3.185 ENSG00000123342 | 204574_s_at | U133A |
| 381 Rn30006077 | 3.185 ENSG00000123342 | 204575_s_at | U133A |
| 381 Rn30006077 | 3.185 ENSG00000123342 | 204574_s_at | U133A |
| 381 Rn30006077 | 3.185 ENSG00000123342 | 204575_s_at | U133A |
| 381 Rn30006077 | 3.185 ENSG00000123342 | 204574_s_at | U133A |
| 381 Rn30006077 | 3.185 ENSG00000123342 | 204575_s_at | U133A |
| 379 Rn30004012 | 3.195 ENSG00000006747 | 222272_x_at | U133A |
| 379 Rn30004012 | 3.195 ENSG00000006747 | 222272_x_at | U133A |
| 379 Rn30004012 | 3.195 ENSG00000006747 | 222272_x_at | U133A |
| 379 Rn30004012 | 3.195 ENSG00000006747 | 222272_x_at | U133A |
| 378 Rn30022206 | 3.215 ENSG00000139318 | 208891_at   | U133A |
| 378 Rn30022206 | 3.215 ENSG00000139318 | 208892_s_at | U133A |
| 378 Rn30022206 | 3.215 ENSG00000139318 | 208893_s_at | U133A |
| 378 Rn30022206 | 3.215 ENSG00000139318 | 208891_at   | U133A |
| 378 Rn30022206 | 3.215 ENSG00000139318 | 208892_s_at | U133A |
| 378 Rn30022206 | 3.215 ENSG00000139318 | 208893_s_at | U133A |
| 377 Rn30005979 | 3.217 ENSG00000069869 | 213012_at   | U133A |
| 377 Rn30005979 | 3.217 ENSG00000069869 | 213012_at   | U133A |
| 377 Rn30005979 | 3.217 ENSG00000069869 | 213012_at   | U133A |
| 377 Rn30005979 | 3.217 ENSG00000069869 | 213012_at   | U133A |
| 376 Rn30002381 | 3.223 ENSG00000109814 | 203343_at   | U133A |
| 375 Rn30004179 | 3.228 ENSG00000169554 | 203603_s_at | U133A |
| 375 Rn30004179 | 3.228 ENSG00000169554 | 215713_at   | U133A |
| 374 Rn30005325 | 3.235 ENSG00000066777 | 202955_s_at | U133A |
| 374 Rn30005325 | 3.235 ENSG00000066777 | 202956_at   | U133A |
| 374 Rn30005325 | 3.235 ENSG00000066777 | 216266_s_at | U133A |
| 373 R003102_01 | 3.236 ENSG00000142619 | 220779_at   | U133A |
| 372 Rn30006931 | 3.239 ENSG00000135404 | 200663_at   | U133A |
| 371 Rn30000888 | 3.254 ENSG00000185344 | 205704_s_at | U133A |

|                |                       |             |       |
|----------------|-----------------------|-------------|-------|
| 371 Rn30000888 | 3.254 ENSG00000185344 | 217603_at   | U133A |
| 371 Rn30000888 | 3.254 ENSG00000185344 | 205704_s_at | U133A |
| 369 Rn30004547 | 3.257 ENSG00000152518 | 201367_s_at | U133A |
| 369 Rn30004547 | 3.257 ENSG00000152518 | 201368_at   | U133A |
| 369 Rn30004547 | 3.257 ENSG00000152518 | 201369_s_at | U133A |
| 370 Rn30001801 | 3.257 ENSG00000181722 | 205383_s_at | U133A |
| 370 Rn30001801 | 3.257 ENSG00000181722 | 222357_at   | U133A |
| 370 Rn30001801 | 3.257 ENSG00000181722 | 205383_s_at | U133A |
| 370 Rn30001801 | 3.257 ENSG00000181722 | 222357_at   | U133A |
| 363 Rn30010189 | 3.294 ENSG00000140307 | 202678_at   | U133A |
| 361 R000806_01 | 3.305 ENSG00000142227 | 203729_at   | U133A |
| 360 R001506_01 | 3.313 ENSG00000141429 | 201722_s_at | U133A |
| 360 R001506_01 | 3.313 ENSG00000141429 | 201723_s_at | U133A |
| 360 R001506_01 | 3.313 ENSG00000141429 | 201724_s_at | U133A |
| 358 R000948_01 | 3.326 ENSG00000122176 | 202709_at   | U133A |
| 357 Rn30017195 | 3.387 ENSG00000115657 | 203192_at   | U133A |
| 357 Rn30017195 | 3.387 ENSG00000115657 | 203192_at   | U133A |
| 352 Rn30020559 | 3.41 ENSG00000101938  | 209763_at   | U133A |
| 351 Rn30005021 | 3.42 ENSG00000153574  | 212973_at   | U133A |
| 347 Rn30012141 | 3.483 ENSG00000180448 | 212873_at   | U133A |
| 346 Rn30011807 | 3.53 ENSG00000185222  | 217975_at   | U133A |
| 344 Rn30017294 | 3.552 ENSG00000182985 | 209030_s_at | U133A |
| 344 Rn30017294 | 3.552 ENSG00000182985 | 209031_at   | U133A |
| 344 Rn30017294 | 3.552 ENSG00000182985 | 209032_s_at | U133A |
| 344 Rn30017294 | 3.552 ENSG00000182985 | 220666_at   | U133A |
| 344 Rn30017294 | 3.552 ENSG00000182985 | 209030_s_at | U133A |
| 344 Rn30017294 | 3.552 ENSG00000182985 | 209031_at   | U133A |
| 344 Rn30017294 | 3.552 ENSG00000182985 | 209032_s_at | U133A |
| 344 Rn30017294 | 3.552 ENSG00000182985 | 220666_at   | U133A |
| 342 R004812_01 | 3.57 ENSG00000181634  | 221085_at   | U133A |
| 341 Rn30019050 | 3.582 ENSG00000108825 | 222064_s_at | U133A |
| 341 Rn30019050 | 3.582 ENSG00000108825 | 222064_s_at | U133A |
| 339 R000016_01 | 3.603 ENSG00000106049 | 215316_at   | U133A |
| 338 Rn30014752 | 3.606 ENSG00000180818 | 218959_at   | U133A |
| 337 Rn30014276 | 3.627 ENSG00000139679 | 218589_at   | U133A |
| 336 Rn30007311 | 3.628 ENSG00000129195 | 221591_s_at | U133A |
| 336 Rn30007311 | 3.628 ENSG00000129195 | 221591_s_at | U133A |
| 335 R000942_01 | 3.635 ENSG00000171055 | 202305_s_at | U133A |
| 335 R000942_01 | 3.635 ENSG00000171055 | 210704_at   | U133A |
| 335 R000942_01 | 3.635 ENSG00000171055 | 215000_s_at | U133A |
| 335 R000942_01 | 3.635 ENSG00000171055 | 202305_s_at | U133A |
| 335 R000942_01 | 3.635 ENSG00000171055 | 210704_at   | U133A |
| 335 R000942_01 | 3.635 ENSG00000171055 | 215000_s_at | U133A |
| 334 Rn30026040 | 3.664 ENSG00000125148 | 212185_x_at | U133A |
| 334 Rn30026040 | 3.664 ENSG00000125148 | 212185_x_at | U133A |
| 334 Rn30026040 | 3.664 ENSG00000125148 | 212185_x_at | U133A |
| 331 Rn30006539 | 3.705 ENSG00000179041 | 209567_at   | U133A |
| 329 Rn30002222 | 3.717 ENSG00000102144 | 200737_at   | U133A |
| 329 Rn30002222 | 3.717 ENSG00000102144 | 200738_s_at | U133A |
| 329 Rn30002222 | 3.717 ENSG00000102144 | 217356_s_at | U133A |
| 327 Rn30008687 | 3.76 ENSG00000139684  | 209009_at   | U133A |
| 327 Rn30008687 | 3.76 ENSG00000139684  | 215095_at   | U133A |
| 327 Rn30008687 | 3.76 ENSG00000139684  | 215096_s_at | U133A |















|                |                       |             |       |
|----------------|-----------------------|-------------|-------|
| 322 Rn30012772 | 3.823 ENSG00000082074 | 211794_at   | U133A |
| 322 Rn30012772 | 3.823 ENSG00000082074 | 211795_s_at | U133A |
| 322 Rn30012772 | 3.823 ENSG00000082074 | 205285_s_at | U133A |
| 322 Rn30012772 | 3.823 ENSG00000082074 | 211794_at   | U133A |
| 322 Rn30012772 | 3.823 ENSG00000082074 | 211795_s_at | U133A |
| 321 Rn30019093 | 3.824 ENSG00000167601 | 202685_s_at | U133A |
| 321 Rn30019093 | 3.824 ENSG00000167601 | 202686_s_at | U133A |
| 321 Rn30019093 | 3.824 ENSG00000167601 | 202685_s_at | U133A |
| 321 Rn30019093 | 3.824 ENSG00000167601 | 202686_s_at | U133A |
| 319 R000719_01 | 3.843 ENSG00000139610 | 207627_s_at | U133A |
| 313 Rn30016270 | 3.986 ENSG00000110057 | 220998_s_at | U133A |
| 313 Rn30016270 | 3.986 ENSG00000110057 | 220998_s_at | U133A |
| 312 Rn30005313 | 3.993 ENSG00000166741 | 202237_at   | U133A |
| 312 Rn30005313 | 3.993 ENSG00000166741 | 202238_s_at | U133A |
| 310 R003406_01 | 4.005 ENSG00000139289 | 212967_x_at | U133A |
| 310 R003406_01 | 4.005 ENSG00000139289 | 217996_at   | U133A |
| 310 R003406_01 | 4.005 ENSG00000139289 | 217997_at   | U133A |
| 310 R003406_01 | 4.005 ENSG00000139289 | 217998_at   | U133A |
| 310 R003406_01 | 4.005 ENSG00000139289 | 217999_s_at | U133A |
| 310 R003406_01 | 4.005 ENSG00000139289 | 218000_s_at | U133A |
| 309 R002384_01 | 4.031 ENSG00000102316 | 208682_s_at | U133A |
| 309 R002384_01 | 4.031 ENSG00000102316 | 213627_at   | U133A |
| 309 R002384_01 | 4.031 ENSG00000102316 | 208682_s_at | U133A |
| 309 R002384_01 | 4.031 ENSG00000102316 | 213627_at   | U133A |
| 309 R002384_01 | 4.031 ENSG00000102316 | 208682_s_at | U133A |
| 309 R002384_01 | 4.031 ENSG00000102316 | 213627_at   | U133A |
| 308 Rn30014283 | 4.052 ENSG00000100246 | 204008_at   | U133A |
| 307 Rn30015360 | 4.062 ENSG00000160867 | 211237_s_at | U133A |
| 307 Rn30015360 | 4.062 ENSG00000160867 | 204579_at   | U133A |
| 307 Rn30015360 | 4.062 ENSG00000160867 | 211237_s_at | U133A |
| 307 Rn30015360 | 4.062 ENSG00000160867 | 204579_at   | U133A |
| 306 Rn30013961 | 4.078 ENSG00000107242 | 205632_s_at | U133A |
| 306 Rn30013961 | 4.078 ENSG00000107242 | 214645_at   | U133A |
| 306 Rn30013961 | 4.078 ENSG00000107242 | 205632_s_at | U133A |
| 305 Rn30015771 | 4.091 ENSG00000196814 | 221687_s_at | U133A |
| 305 Rn30015771 | 4.091 ENSG00000196814 | 221828_s_at | U133A |
| 305 Rn30015771 | 4.091 ENSG00000196814 | 52975_at    | U133A |
| 304 R000313_01 | 4.111 ENSG00000148700 | 201752_s_at | U133A |
| 304 R000313_01 | 4.111 ENSG00000148700 | 201753_s_at | U133A |
| 304 R000313_01 | 4.111 ENSG00000148700 | 205882_x_at | U133A |
| 304 R000313_01 | 4.111 ENSG00000148700 | 201752_s_at | U133A |
| 304 R000313_01 | 4.111 ENSG00000148700 | 201753_s_at | U133A |
| 304 R000313_01 | 4.111 ENSG00000148700 | 205882_x_at | U133A |
| 304 R000313_01 | 4.111 ENSG00000148700 | 201752_s_at | U133A |
| 304 R000313_01 | 4.111 ENSG00000148700 | 201753_s_at | U133A |
| 304 R000313_01 | 4.111 ENSG00000148700 | 205882_x_at | U133A |
| 304 R000313_01 | 4.111 ENSG00000148700 | 201752_s_at | U133A |
| 304 R000313_01 | 4.111 ENSG00000148700 | 201753_s_at | U133A |
| 304 R000313_01 | 4.111 ENSG00000148700 | 205882_x_at | U133A |
| 304 R000313_01 | 4.111 ENSG00000148700 | 201752_s_at | U133A |
| 304 R000313_01 | 4.111 ENSG00000148700 | 201753_s_at | U133A |
| 304 R000313_01 | 4.111 ENSG00000148700 | 205882_x_at | U133A |
| 304 R000313_01 | 4.111 ENSG00000148700 | 201752_s_at | U133A |
| 304 R000313_01 | 4.111 ENSG00000148700 | 201753_s_at | U133A |
| 304 R000313_01 | 4.111 ENSG00000148700 | 205882_x_at | U133A |
| 304 R000313_01 | 4.111 ENSG00000148700 | 201752_s_at | U133A |

|                |                       |             |       |
|----------------|-----------------------|-------------|-------|
| 304 R000313_01 | 4.111 ENSG00000148700 | 201753_s_at | U133A |
| 304 R000313_01 | 4.111 ENSG00000148700 | 205882_x_at | U133A |
| 303 Rn30013665 | 4.118 ENSG00000129691 | 209517_s_at | U133A |
| 303 Rn30013665 | 4.118 ENSG00000129691 | 209517_s_at | U133A |
| 298 R003502_01 | 4.18 ENSG00000146242  | 203476_at   | U133A |
| 299 R000591_01 | 4.18 ENSG00000151729  | 202825_at   | U133A |
| 297 Rn30011359 | 4.213 ENSG00000013573 | 208159_x_at | U133A |
| 297 Rn30011359 | 4.213 ENSG00000013573 | 208149_x_at | U133A |
| 297 Rn30011359 | 4.213 ENSG00000013573 | 210206_s_at | U133A |
| 297 Rn30011359 | 4.213 ENSG00000013573 | 208159_x_at | U133A |
| 297 Rn30011359 | 4.213 ENSG00000013573 | 208149_x_at | U133A |
| 297 Rn30011359 | 4.213 ENSG00000013573 | 210206_s_at | U133A |
| 297 Rn30011359 | 4.213 ENSG00000013573 | 208159_x_at | U133A |
| 297 Rn30011359 | 4.213 ENSG00000013573 | 208149_x_at | U133A |
| 297 Rn30011359 | 4.213 ENSG00000013573 | 210206_s_at | U133A |
| 297 Rn30011359 | 4.213 ENSG00000013573 | 208159_x_at | U133A |
| 297 Rn30011359 | 4.213 ENSG00000013573 | 208149_x_at | U133A |
| 297 Rn30011359 | 4.213 ENSG00000013573 | 210206_s_at | U133A |
| 297 Rn30011359 | 4.213 ENSG00000013573 | 208159_x_at | U133A |
| 297 Rn30011359 | 4.213 ENSG00000013573 | 208149_x_at | U133A |
| 297 Rn30011359 | 4.213 ENSG00000013573 | 210206_s_at | U133A |
| 295 R002854_01 | 4.249 ENSG00000115935 | 202665_s_at | U133A |
| 295 R002854_01 | 4.249 ENSG00000115935 | 202663_at   | U133A |
| 295 R002854_01 | 4.249 ENSG00000115935 | 202664_at   | U133A |
| 295 R002854_01 | 4.249 ENSG00000115935 | 202665_s_at | U133A |
| 295 R002854_01 | 4.249 ENSG00000115935 | 202663_at   | U133A |
| 295 R002854_01 | 4.249 ENSG00000115935 | 202664_at   | U133A |
| 295 R002854_01 | 4.249 ENSG00000115935 | 202665_s_at | U133A |
| 295 R002854_01 | 4.249 ENSG00000115935 | 202663_at   | U133A |
| 295 R002854_01 | 4.249 ENSG00000115935 | 202664_at   | U133A |
| 293 R002253_01 | 4.283 ENSG00000159164 | 203069_at   | U133A |
| 289 Rn30008491 | 4.351 ENSG00000163956 | 201186_at   | U133A |
| 287 R002735_01 | 4.381 ENSG00000134259 | 206814_at   | U133A |
| 286 Rn30016159 | 4.395 ENSG00000137274 | 205750_at   | U133A |
| 286 Rn30016159 | 4.395 ENSG00000137274 | 205750_at   | U133A |
| 282 Rn30017950 | 4.467 ENSG00000126561 | 203010_at   | U133A |
| 281 Rn30007177 | 4.5 ENSG00000135424   | 209663_s_at | U133A |
| 281 Rn30007177 | 4.5 ENSG00000135424   | 216331_at   | U133A |
| 281 Rn30007177 | 4.5 ENSG00000135424   | 209663_s_at | U133A |
| 281 Rn30007177 | 4.5 ENSG00000135424   | 216331_at   | U133A |
| 281 Rn30007177 | 4.5 ENSG00000135424   | 209663_s_at | U133A |
| 281 Rn30007177 | 4.5 ENSG00000135424   | 216331_at   | U133A |
| 281 Rn30007177 | 4.5 ENSG00000135424   | 209663_s_at | U133A |
| 281 Rn30007177 | 4.5 ENSG00000135424   | 216331_at   | U133A |
| 281 Rn30007177 | 4.5 ENSG00000135424   | 209663_s_at | U133A |
| 281 Rn30007177 | 4.5 ENSG00000135424   | 216331_at   | U133A |
| 281 Rn30007177 | 4.5 ENSG00000135424   | 209663_s_at | U133A |
| 281 Rn30007177 | 4.5 ENSG00000135424   | 216331_at   | U133A |
| 281 Rn30007177 | 4.5 ENSG00000135424   | 209663_s_at | U133A |
| 281 Rn30007177 | 4.5 ENSG00000135424   | 216331_at   | U133A |
| 281 Rn30007177 | 4.5 ENSG00000135424   | 209663_s_at | U133A |
| 281 Rn30007177 | 4.5 ENSG00000135424   | 216331_at   | U133A |
| 280 Rn30016084 | 4.527 ENSG00000162836 | 218795_at   | U133A |

|                |                       |             |       |
|----------------|-----------------------|-------------|-------|
| 278 Rn30014171 | 4.539 ENSG00000116096 | 203458_at   | U133A |
| 278 Rn30014171 | 4.539 ENSG00000116096 | 203458_at   | U133A |
| 276 R004570_01 | 4.574 ENSG00000026652 | 219693_at   | U133A |
| 277 Rn30019247 | 4.574 ENSG00000090006 | 204442_x_at | U133A |
| 277 Rn30019247 | 4.574 ENSG00000090006 | 210628_x_at | U133A |
| 277 Rn30019247 | 4.574 ENSG00000090006 | 213176_s_at | U133A |
| 277 Rn30019247 | 4.574 ENSG00000090006 | 204442_x_at | U133A |
| 277 Rn30019247 | 4.574 ENSG00000090006 | 210628_x_at | U133A |
| 277 Rn30019247 | 4.574 ENSG00000090006 | 213176_s_at | U133A |
| 277 Rn30019247 | 4.574 ENSG00000090006 | 204442_x_at | U133A |
| 277 Rn30019247 | 4.574 ENSG00000090006 | 210628_x_at | U133A |
| 277 Rn30019247 | 4.574 ENSG00000090006 | 204442_x_at | U133A |
| 277 Rn30019247 | 4.574 ENSG00000090006 | 210628_x_at | U133A |
| 277 Rn30019247 | 4.574 ENSG00000090006 | 213176_s_at | U133A |
| 277 Rn30019247 | 4.574 ENSG00000090006 | 204442_x_at | U133A |
| 277 Rn30019247 | 4.574 ENSG00000090006 | 210628_x_at | U133A |
| 277 Rn30019247 | 4.574 ENSG00000090006 | 213176_s_at | U133A |
| 275 Rn30007653 | 4.586 ENSG00000134369 | 216155_at   | U133A |
| 275 Rn30007653 | 4.586 ENSG00000134369 | 216155_at   | U133A |
| 275 Rn30007653 | 4.586 ENSG00000134369 | 216155_at   | U133A |
| 275 Rn30007653 | 4.586 ENSG00000134369 | 216155_at   | U133A |
| 274 Rn30007911 | 4.606 ENSG00000135111 | 219682_s_at | U133A |
| 274 Rn30007911 | 4.606 ENSG00000135111 | 219682_s_at | U133A |
| 274 Rn30007911 | 4.606 ENSG00000135111 | 219682_s_at | U133A |
| 273 Rn30023383 | 4.616 ENSG00000123384 | 200784_s_at | U133A |
| 273 Rn30023383 | 4.616 ENSG00000123384 | 200785_s_at | U133A |
| 273 Rn30023383 | 4.616 ENSG00000123384 | 200784_s_at | U133A |
| 273 Rn30023383 | 4.616 ENSG00000123384 | 200785_s_at | U133A |
| 273 Rn30023383 | 4.616 ENSG00000123384 | 200784_s_at | U133A |
| 273 Rn30023383 | 4.616 ENSG00000123384 | 200785_s_at | U133A |
| 273 Rn30023383 | 4.616 ENSG00000123384 | 200784_s_at | U133A |
| 273 Rn30023383 | 4.616 ENSG00000123384 | 200785_s_at | U133A |
| 271 Rn30005801 | 4.634 ENSG00000121022 | 201652_at   | U133A |
| 271 Rn30005801 | 4.634 ENSG00000121022 | 201652_at   | U133A |
| 271 Rn30005801 | 4.634 ENSG00000121022 | 201652_at   | U133A |
| 271 Rn30005801 | 4.634 ENSG00000121022 | 201652_at   | U133A |
| 270 Rn30011967 | 4.638 ENSG00000020181 | 221814_at   | U133A |
| 270 Rn30011967 | 4.638 ENSG00000020181 | 65718_at    | U133A |
| 270 Rn30011967 | 4.638 ENSG00000020181 | 221814_at   | U133A |
| 270 Rn30011967 | 4.638 ENSG00000020181 | 65718_at    | U133A |
| 268 Rn30006798 | 4.713 ENSG00000123545 | 219006_at   | U133A |
| 266 Rn30009278 | 4.774 ENSG00000138795 | 210948_s_at | U133A |
| 266 Rn30009278 | 4.774 ENSG00000138795 | 221557_s_at | U133A |
| 266 Rn30009278 | 4.774 ENSG00000138795 | 221558_s_at | U133A |
| 265 R004516_01 | 4.795 ENSG00000095739 | 203304_at   | U133A |
| 264 Rn30007102 | 4.81 ENSG00000014123  | 212633_at   | U133A |
| 264 Rn30007102 | 4.81 ENSG00000014123  | 212634_at   | U133A |
| 264 Rn30007102 | 4.81 ENSG00000014123  | 212633_at   | U133A |
| 264 Rn30007102 | 4.81 ENSG00000014123  | 212634_at   | U133A |
| 263 Rn30002174 | 4.813 ENSG00000135842 | 217966_s_at | U133A |
| 263 Rn30002174 | 4.813 ENSG00000135842 | 217967_s_at | U133A |
| 261 Rn30011367 | 4.841 ENSG00000079819 | 201718_s_at | U133A |
| 261 Rn30011367 | 4.841 ENSG00000079819 | 201719_s_at | U133A |

|     |            |       |                 |             |       |
|-----|------------|-------|-----------------|-------------|-------|
| 261 | Rn30011367 | 4.841 | ENSG00000079819 | 201718_s_at | U133A |
| 261 | Rn30011367 | 4.841 | ENSG00000079819 | 201719_s_at | U133A |
| 261 | Rn30011367 | 4.841 | ENSG00000079819 | 201718_s_at | U133A |
| 261 | Rn30011367 | 4.841 | ENSG00000079819 | 201719_s_at | U133A |
| 261 | Rn30011367 | 4.841 | ENSG00000079819 | 201718_s_at | U133A |
| 261 | Rn30011367 | 4.841 | ENSG00000079819 | 201719_s_at | U133A |
| 259 | Rn30002821 | 4.897 | ENSG00000132386 | 202283_at   | U133A |
| 257 | Rn30009053 | 4.94  | ENSG00000170275 | 201380_at   | U133A |
| 255 | R002437_01 | 4.958 | ENSG00000169903 | 209937_at   | U133A |
| 254 | Rn30001622 | 4.97  | ENSG00000171656 | 216375_s_at | U133A |
| 254 | Rn30001622 | 4.97  | ENSG00000171656 | 203348_s_at | U133A |
| 254 | Rn30001622 | 4.97  | ENSG00000171656 | 203349_s_at | U133A |
| 253 | Rn30013795 | 5.07  | ENSG00000118523 | 209101_at   | U133A |
| 252 | Rn30005328 | 5.138 | ENSG00000126233 | 214536_at   | U133A |
| 251 | R000984_01 | 5.155 | ENSG00000122644 | 205020_s_at | U133A |
| 251 | R000984_01 | 5.155 | ENSG00000122644 | 205020_s_at | U133A |
| 250 | Rn30015961 | 5.173 | ENSG00000135916 | 221004_s_at | U133A |
| 250 | Rn30015961 | 5.173 | ENSG00000135916 | 221004_s_at | U133A |
| 250 | Rn30015961 | 5.173 | ENSG00000135916 | 221004_s_at | U133A |
| 249 | Rn30007603 | 5.229 | ENSG00000173917 | 205453_at   | U133A |
| 249 | Rn30007603 | 5.229 | ENSG00000173917 | 205453_at   | U133A |
| 248 | R003632_01 | 5.295 | ENSG00000028137 | 203508_at   | U133A |
| 248 | R003632_01 | 5.295 | ENSG00000028137 | 203508_at   | U133A |
| 247 | Rn30008808 | 5.316 | ENSG00000152556 | 210976_s_at | U133A |
| 247 | Rn30008808 | 5.316 | ENSG00000152556 | 210976_s_at | U133A |
| 247 | Rn30008808 | 5.316 | ENSG00000152556 | 210976_s_at | U133A |
| 246 | Rn30015779 | 5.325 | ENSG00000124564 | 207298_at   | U133A |
| 246 | Rn30015779 | 5.325 | ENSG00000124564 | 207298_at   | U133A |
| 243 | Rn30015358 | 5.428 | ENSG00000134013 | 202997_s_at | U133A |
| 243 | Rn30015358 | 5.428 | ENSG00000134013 | 202999_s_at | U133A |
| 243 | Rn30015358 | 5.428 | ENSG00000134013 | 202998_s_at | U133A |
| 241 | Rn30015672 | 5.472 | ENSG00000107159 | 205199_at   | U133A |
| 239 | Rn30014453 | 5.603 | ENSG00000141696 | 204078_at   | U133A |
| 239 | Rn30014453 | 5.603 | ENSG00000141696 | 204078_at   | U133A |
| 239 | Rn30014453 | 5.603 | ENSG00000141696 | 204078_at   | U133A |
| 239 | Rn30014453 | 5.603 | ENSG00000141696 | 204078_at   | U133A |
| 238 | Rn30017925 | 5.616 | ENSG00000131370 | 201810_s_at | U133A |
| 238 | Rn30017925 | 5.616 | ENSG00000131370 | 201811_x_at | U133A |
| 237 | R003618_01 | 5.618 | ENSG00000059804 | 202497_x_at | U133A |
| 237 | R003618_01 | 5.618 | ENSG00000059804 | 202498_s_at | U133A |
| 237 | R003618_01 | 5.618 | ENSG00000059804 | 202499_s_at | U133A |
| 235 | Rn30013530 | 5.657 | ENSG00000116985 | 207865_s_at | U133A |
| 235 | Rn30013530 | 5.657 | ENSG00000116985 | 207866_at   | U133A |
| 235 | Rn30013530 | 5.657 | ENSG00000116985 | 220256_s_at | U133A |
| 235 | Rn30013530 | 5.657 | ENSG00000116985 | 221615_at   | U133A |
| 234 | Rn30014179 | 5.695 | ENSG00000135919 | 212190_at   | U133A |
| 232 | Rn30009062 | 5.84  | ENSG00000100097 | 201105_at   | U133A |
| 231 | Rn30013930 | 5.855 | ENSG00000119431 | 221256_s_at | U133A |
| 228 | Rn30018087 | 5.957 | ENSG00000163359 | 201438_at   | U133A |
| 228 | Rn30018087 | 5.957 | ENSG00000163359 | 201438_at   | U133A |
| 228 | Rn30018087 | 5.957 | ENSG00000163359 | 201438_at   | U133A |
| 228 | Rn30018087 | 5.957 | ENSG00000163359 | 201438_at   | U133A |
| 227 | Rn30011141 | 5.973 | ENSG00000119681 | 204682_at   | U133A |

|                |                       |             |       |
|----------------|-----------------------|-------------|-------|
| 225 Rn30012338 | 6.041 ENSG00000153071 | 201278_at   | U133A |
| 225 Rn30012338 | 6.041 ENSG00000153071 | 201279_s_at | U133A |
| 225 Rn30012338 | 6.041 ENSG00000153071 | 201280_s_at | U133A |
| 225 Rn30012338 | 6.041 ENSG00000153071 | 210757_x_at | U133A |
| 225 Rn30012338 | 6.041 ENSG00000153071 | 201278_at   | U133A |
| 225 Rn30012338 | 6.041 ENSG00000153071 | 201279_s_at | U133A |
| 225 Rn30012338 | 6.041 ENSG00000153071 | 201280_s_at | U133A |
| 225 Rn30012338 | 6.041 ENSG00000153071 | 210757_x_at | U133A |
| 224 Rn30022896 | 6.05 ENSG00000130005  | 205354_at   | U133A |
| 221 Rn30006053 | 6.189 ENSG00000179222 | 209014_at   | U133A |
| 221 Rn30006053 | 6.189 ENSG00000179222 | 209014_at   | U133A |
| 221 Rn30006053 | 6.189 ENSG00000179222 | 209014_at   | U133A |
| 220 Rn30019378 | 6.425 ENSG00000110025 | 202564_x_at | U133A |
| 220 Rn30019378 | 6.425 ENSG00000110025 | 205482_x_at | U133A |
| 220 Rn30019378 | 6.425 ENSG00000110025 | 202564_x_at | U133A |
| 220 Rn30019378 | 6.425 ENSG00000110025 | 205482_x_at | U133A |
| 218 R003598_01 | 6.586 ENSG00000037965 | 221350_at   | U133A |
| 217 R003051_01 | 6.601 ENSG00000131477 | 205779_at   | U133A |
| 216 Rn30015933 | 6.607 ENSG00000165983 | 218967_s_at | U133A |
| 216 Rn30015933 | 6.607 ENSG00000165983 | 218967_s_at | U133A |
| 215 Rn30009686 | 6.675 ENSG00000186340 | 203083_at   | U133A |
| 213 R000858_01 | 6.821 ENSG00000171097 | 206037_at   | U133A |
| 213 R000858_01 | 6.821 ENSG00000171097 | 206037_at   | U133A |
| 212 R002918_01 | 6.832 ENSG00000131979 | 204224_s_at | U133A |
| 212 R002918_01 | 6.832 ENSG00000131979 | 204224_s_at | U133A |
| 211 Rn30016432 | 6.892 ENSG00000148516 | 208078_s_at | U133A |
| 211 Rn30016432 | 6.892 ENSG00000148516 | 210875_s_at | U133A |
| 211 Rn30016432 | 6.892 ENSG00000148516 | 212758_s_at | U133A |
| 211 Rn30016432 | 6.892 ENSG00000148516 | 212764_at   | U133A |
| 211 Rn30016432 | 6.892 ENSG00000148516 | 208078_s_at | U133A |
| 211 Rn30016432 | 6.892 ENSG00000148516 | 210875_s_at | U133A |
| 211 Rn30016432 | 6.892 ENSG00000148516 | 212758_s_at | U133A |
| 211 Rn30016432 | 6.892 ENSG00000148516 | 212764_at   | U133A |
| 211 Rn30016432 | 6.892 ENSG00000148516 | 208078_s_at | U133A |
| 211 Rn30016432 | 6.892 ENSG00000148516 | 210875_s_at | U133A |
| 211 Rn30016432 | 6.892 ENSG00000148516 | 212758_s_at | U133A |
| 211 Rn30016432 | 6.892 ENSG00000148516 | 212764_at   | U133A |
| 211 Rn30016432 | 6.892 ENSG00000148516 | 208078_s_at | U133A |
| 211 Rn30016432 | 6.892 ENSG00000148516 | 210875_s_at | U133A |
| 211 Rn30016432 | 6.892 ENSG00000148516 | 212758_s_at | U133A |
| 211 Rn30016432 | 6.892 ENSG00000148516 | 212764_at   | U133A |
| 210 Rn30013792 | 6.95 ENSG00000170925  | 221034_s_at | U133A |
| 210 Rn30013792 | 6.95 ENSG00000170925  | 221034_s_at | U133A |
| 209 R002163_01 | 6.988 ENSG00000137880 | 204867_at   | U133A |
| 208 Rn30014762 | 7.013 ENSG00000079215 | 202800_at   | U133A |
| 207 Rn30007323 | 7.019 ENSG00000175305 | 205034_at   | U133A |
| 207 Rn30007323 | 7.019 ENSG00000175305 | 211814_s_at | U133A |
| 207 Rn30007323 | 7.019 ENSG00000175305 | 205034_at   | U133A |
| 207 Rn30007323 | 7.019 ENSG00000175305 | 211814_s_at | U133A |
| 206 Rn30011122 | 7.103 ENSG00000166801 | 218248_at   | U133A |
| 205 R004581_01 | 7.121 ENSG00000089472 | 203902_at   | U133A |
| 205 R004581_01 | 7.121 ENSG00000089472 | 203903_s_at | U133A |
| 205 R004581_01 | 7.121 ENSG00000089472 | 203902_at   | U133A |

|                |                       |             |       |
|----------------|-----------------------|-------------|-------|
| 205 R004581_01 | 7.121 ENSG00000089472 | 203903_s_at | U133A |
| 205 R004581_01 | 7.121 ENSG00000089472 | 203902_at   | U133A |
| 205 R004581_01 | 7.121 ENSG00000089472 | 203903_s_at | U133A |
| 205 R004581_01 | 7.121 ENSG00000089472 | 203902_at   | U133A |
| 205 R004581_01 | 7.121 ENSG00000089472 | 203903_s_at | U133A |
| 205 R004581_01 | 7.121 ENSG00000089472 | 203902_at   | U133A |
| 205 R004581_01 | 7.121 ENSG00000089472 | 203903_s_at | U133A |
| 204 Rn30011999 | 7.3 ENSG00000186088   | 222150_s_at | U133A |
| 202 Rn30007350 | 7.517 ENSG00000185633 | 218484_at   | U133A |
| 202 Rn30007350 | 7.517 ENSG00000185633 | 218484_at   | U133A |
| 199 Rn30006587 | 7.774 ENSG00000101049 | 220357_s_at | U133A |
| 199 Rn30006587 | 7.774 ENSG00000101049 | 220357_s_at | U133A |
| 198 Rn30016497 | 7.82 ENSG00000137501  | 220613_s_at | U133A |
| 197 Rn30003565 | 7.981 ENSG00000155974 | 214018_at   | U133A |
| 197 Rn30003565 | 7.981 ENSG00000155974 | 214018_at   | U133A |
| 196 Rn30015917 | 8 ENSG00000183479     | 207891_s_at | U133A |
| 196 Rn30015917 | 8 ENSG00000183479     | 211788_s_at | U133A |
| 196 Rn30015917 | 8 ENSG00000183479     | 213334_x_at | U133A |
| 196 Rn30015917 | 8 ENSG00000183479     | 207891_s_at | U133A |
| 196 Rn30015917 | 8 ENSG00000183479     | 211788_s_at | U133A |
| 196 Rn30015917 | 8 ENSG00000183479     | 213334_x_at | U133A |
| 196 Rn30015917 | 8 ENSG00000183479     | 207891_s_at | U133A |
| 196 Rn30015917 | 8 ENSG00000183479     | 211788_s_at | U133A |
| 196 Rn30015917 | 8 ENSG00000183479     | 213334_x_at | U133A |
| 195 R000949_01 | 8.072 ENSG00000103024 | 204862_s_at | U133A |
| 193 Rn30015203 | 8.366 ENSG00000018408 | 202132_at   | U133A |
| 193 Rn30015203 | 8.366 ENSG00000018408 | 202133_at   | U133A |
| 193 Rn30015203 | 8.366 ENSG00000018408 | 202134_s_at | U133A |
| 193 Rn30015203 | 8.366 ENSG00000018408 | 202132_at   | U133A |
| 193 Rn30015203 | 8.366 ENSG00000018408 | 202133_at   | U133A |
| 193 Rn30015203 | 8.366 ENSG00000018408 | 202134_s_at | U133A |
| 192 Rn30012210 | 8.416 ENSG00000085871 | 204168_at   | U133A |
| 192 Rn30012210 | 8.416 ENSG00000085871 | 204168_at   | U133A |
| 192 Rn30012210 | 8.416 ENSG00000085871 | 204168_at   | U133A |
| 192 Rn30012210 | 8.416 ENSG00000085871 | 204168_at   | U133A |
| 190 Rn30012217 | 8.648 ENSG00000118520 | 206177_s_at | U133A |
| 190 Rn30012217 | 8.648 ENSG00000118520 | 206177_s_at | U133A |
| 190 Rn30012217 | 8.648 ENSG00000118520 | 206177_s_at | U133A |
| 188 Rn30012318 | 9.015 ENSG00000154556 | 220858_at   | U133A |
| 188 Rn30012318 | 9.015 ENSG00000154556 | 204288_s_at | U133A |
| 188 Rn30012318 | 9.015 ENSG00000154556 | 220858_at   | U133A |
| 188 Rn30012318 | 9.015 ENSG00000154556 | 204288_s_at | U133A |
| 188 Rn30012318 | 9.015 ENSG00000154556 | 220858_at   | U133A |
| 188 Rn30012318 | 9.015 ENSG00000154556 | 204288_s_at | U133A |
| 188 Rn30012318 | 9.015 ENSG00000154556 | 220858_at   | U133A |
| 188 Rn30012318 | 9.015 ENSG00000154556 | 204288_s_at | U133A |
| 188 Rn30012318 | 9.015 ENSG00000154556 | 220858_at   | U133A |
| 188 Rn30012318 | 9.015 ENSG00000154556 | 204288_s_at | U133A |
| 187 Rn30009044 | 9.185 ENSG00000119699 | 209747_at   | U133A |
| 186 Rn30025924 | 9.815 ENSG00000184897 | 204805_s_at | U133A |
| 185 Rn30007612 | 9.948 ENSG00000184117 | 201708_s_at | U133A |
| 185 Rn30007612 | 9.948 ENSG00000184117 | 201709_s_at | U133A |
| 184 R004040_01 | 9.989 ENSG00000157766 | 205679_x_at | U133A |

|                |       |                 |             |       |
|----------------|-------|-----------------|-------------|-------|
| 184 R004040_01 | 9.989 | ENSG00000157766 | 207692_s_at | U133A |
| 184 R004040_01 | 9.989 | ENSG00000157766 | 217161_x_at | U133A |
| 184 R004040_01 | 9.989 | ENSG00000157766 | 205679_x_at | U133A |
| 184 R004040_01 | 9.989 | ENSG00000157766 | 207692_s_at | U133A |
| 184 R004040_01 | 9.989 | ENSG00000157766 | 217161_x_at | U133A |
| 184 R004040_01 | 9.989 | ENSG00000157766 | 205679_x_at | U133A |
| 184 R004040_01 | 9.989 | ENSG00000157766 | 207692_s_at | U133A |
| 184 R004040_01 | 9.989 | ENSG00000157766 | 217161_x_at | U133A |
| 182 Rn30014679 | 10.19 | ENSG00000110811 | 205056_s_at | U133A |
| 182 Rn30014679 | 10.19 | ENSG00000110811 | 205056_s_at | U133A |
| 182 Rn30014679 | 10.19 | ENSG00000110811 | 205056_s_at | U133A |
| 182 Rn30014679 | 10.19 | ENSG00000110811 | 204854_at   | U133A |
| 182 Rn30014679 | 10.19 | ENSG00000110811 | 204854_at   | U133A |
| 181 Rn30008906 | 10.34 | ENSG00000198074 | 206561_s_at | U133A |
| 180 R004366_01 | 10.37 | ENSG00000102057 | 206842_at   | U133A |
| 179 Rn30012078 | 10.8  | ENSG00000111674 | 201313_at   | U133A |
| 178 Rn30018959 | 10.87 | ENSG00000172638 | 206580_s_at | U133A |
| 178 Rn30018959 | 10.87 | ENSG00000172638 | 209356_x_at | U133A |
| 176 Rn30011834 | 11.06 | ENSG00000113140 | 200665_s_at | U133A |
| 176 Rn30011834 | 11.06 | ENSG00000113140 | 212667_at   | U133A |
| 174 Rn30014340 | 11.3  | ENSG00000112964 | 205498_at   | U133A |
| 174 Rn30014340 | 11.3  | ENSG00000112964 | 205498_at   | U133A |
| 174 Rn30014340 | 11.3  | ENSG00000112964 | 205498_at   | U133A |
| 172 Rn30013250 | 11.5  | ENSG00000117971 | 207516_at   | U133A |
| 170 Rn30015774 | 11.56 | ENSG00000124610 | 208484_at   | U133A |
| 169 Rn30010843 | 11.84 | ENSG00000106605 | 203771_s_at | U133A |
| 169 Rn30010843 | 11.84 | ENSG00000106605 | 203773_x_at | U133A |
| 169 Rn30010843 | 11.84 | ENSG00000106605 | 211729_x_at | U133A |
| 167 R003640_01 | 12.05 | ENSG00000128602 | 218629_at   | U133A |
| 166 Rn30006894 | 12.12 | ENSG00000120087 | 204778_x_at | U133A |
| 166 Rn30006894 | 12.12 | ENSG00000120087 | 204779_s_at | U133A |
| 166 Rn30006894 | 12.12 | ENSG00000120087 | 216973_s_at | U133A |
| 165 R000886_01 | 12.16 | ENSG00000154734 | 222162_s_at | U133A |
| 164 Rn30005395 | 12.22 | ENSG00000123689 | 213524_s_at | U133A |
| 163 R002210_01 | 12.32 | ENSG00000025434 | 203920_at   | U133A |
| 163 R002210_01 | 12.32 | ENSG00000025434 | 203920_at   | U133A |
| 162 Rn30011013 | 12.34 | ENSG00000105894 | 209465_x_at | U133A |
| 162 Rn30011013 | 12.34 | ENSG00000105894 | 209466_x_at | U133A |
| 162 Rn30011013 | 12.34 | ENSG00000105894 | 211737_x_at | U133A |
| 161 R002917_01 | 12.57 | ENSG00000134824 | 202218_s_at | U133A |
| 161 R002917_01 | 12.57 | ENSG00000134824 | 202218_s_at | U133A |
| 160 R000531_01 | 12.74 | ENSG00000117091 | 204118_at   | U133A |
| 159 R004282_01 | 13.16 | ENSG00000197594 | 205065_at   | U133A |
| 159 R004282_01 | 13.16 | ENSG00000197594 | 205066_s_at | U133A |
| 159 R004282_01 | 13.16 | ENSG00000197594 | 205065_at   | U133A |
| 159 R004282_01 | 13.16 | ENSG00000197594 | 205066_s_at | U133A |
| 157 Rn30010405 | 13.32 | ENSG00000164692 | 202403_s_at | U133A |
| 157 Rn30010405 | 13.32 | ENSG00000164692 | 202404_s_at | U133A |
| 156 Rn30012491 | 13.36 | ENSG00000107562 | 203666_at   | U133A |
| 156 Rn30012491 | 13.36 | ENSG00000107562 | 209687_at   | U133A |
| 155 Rn30010961 | 13.5  | ENSG00000108244 | 218963_s_at | U133A |
| 155 Rn30010961 | 13.5  | ENSG00000108244 | 218963_s_at | U133A |
| 154 Rn30013562 | 13.62 | ENSG00000137104 | 203179_at   | U133A |



|                |       |                 |             |       |
|----------------|-------|-----------------|-------------|-------|
| 154 Rn30013562 | 13.62 | ENSG00000137104 | 203179_at   | U133A |
| 154 Rn30013562 | 13.62 | ENSG00000137104 | 203179_at   | U133A |
| 154 Rn30013562 | 13.62 | ENSG00000137104 | 203179_at   | U133A |
| 153 R000773_01 | 13.76 | ENSG00000128311 | 209605_at   | U133A |
| 153 R000773_01 | 13.76 | ENSG00000128311 | 209605_at   | U133A |
| 151 R003839_01 | 14.09 | ENSG00000109586 | 216756_at   | U133A |
| 151 R003839_01 | 14.09 | ENSG00000109586 | 218313_s_at | U133A |
| 150 Rn30004186 | 14.26 | ENSG00000115290 | 206204_at   | U133A |
| 149 Rn30008771 | 14.9  | ENSG00000124216 | 219480_at   | U133A |
| 148 Rn30003894 | 16.17 | ENSG00000134324 | 212272_at   | U133A |
| 148 Rn30003894 | 16.17 | ENSG00000134324 | 212274_at   | U133A |
| 148 Rn30003894 | 16.17 | ENSG00000134324 | 212276_at   | U133A |
| 147 R000576_01 | 16.49 | ENSG00000167969 | 209759_s_at | U133A |
| 146 Rn30017704 | 17.06 | ENSG00000162576 | 213422_s_at | U133A |
| 146 Rn30017704 | 17.06 | ENSG00000162576 | 213422_s_at | U133A |
| 145 Rn30005620 | 17.51 | ENSG00000167157 | 219729_at   | U133A |
| 144 R002730_01 | 17.69 | ENSG00000144712 | 213547_at   | U133A |
| 144 R002730_01 | 17.69 | ENSG00000144712 | 213547_at   | U133A |
| 142 Rn30013181 | 18.29 | ENSG00000109511 | 210143_at   | U133A |
| 142 Rn30013181 | 18.29 | ENSG00000109511 | 210143_at   | U133A |
| 140 R000456_01 | 18.82 | ENSG00000168542 | 215076_s_at | U133A |
| 140 R000456_01 | 18.82 | ENSG00000168542 | 215077_at   | U133A |
| 140 R000456_01 | 18.82 | ENSG00000168542 | 201852_x_at | U133A |
| 140 R000456_01 | 18.82 | ENSG00000168542 | 215076_s_at | U133A |
| 140 R000456_01 | 18.82 | ENSG00000168542 | 215077_at   | U133A |
| 140 R000456_01 | 18.82 | ENSG00000168542 | 201852_x_at | U133A |
| 139 R001880_01 | 19.22 | ENSG00000069424 | 203402_at   | U133A |
| 139 R001880_01 | 19.22 | ENSG00000069424 | 211791_s_at | U133A |
| 139 R001880_01 | 19.22 | ENSG00000069424 | 203402_at   | U133A |
| 139 R001880_01 | 19.22 | ENSG00000069424 | 211791_s_at | U133A |
| 139 R001880_01 | 19.22 | ENSG00000069424 | 203402_at   | U133A |
| 139 R001880_01 | 19.22 | ENSG00000069424 | 211791_s_at | U133A |
| 138 Rn30017386 | 19.69 | ENSG00000106483 | 204051_s_at | U133A |
| 138 Rn30017386 | 19.69 | ENSG00000106483 | 204052_s_at | U133A |
| 137 Rn30025538 | 19.77 | ENSG00000092847 | 218287_s_at | U133A |
| 136 Rn30007381 | 19.8  | ENSG00000178234 | 219013_at   | U133A |
| 136 Rn30007381 | 19.8  | ENSG00000178234 | 219013_at   | U133A |
| 135 Rn30010721 | 20.76 | ENSG00000188677 | 204629_at   | U133A |
| 135 Rn30010721 | 20.76 | ENSG00000188677 | 216253_s_at | U133A |
| 135 Rn30010721 | 20.76 | ENSG00000188677 | 216254_at   | U133A |
| 135 Rn30010721 | 20.76 | ENSG00000188677 | 37965_at    | U133A |
| 135 Rn30010721 | 20.76 | ENSG00000188677 | 204629_at   | U133A |
| 135 Rn30010721 | 20.76 | ENSG00000188677 | 216253_s_at | U133A |
| 135 Rn30010721 | 20.76 | ENSG00000188677 | 216254_at   | U133A |
| 135 Rn30010721 | 20.76 | ENSG00000188677 | 37965_at    | U133A |
| 135 Rn30010721 | 20.76 | ENSG00000188677 | 204629_at   | U133A |
| 135 Rn30010721 | 20.76 | ENSG00000188677 | 216253_s_at | U133A |
| 135 Rn30010721 | 20.76 | ENSG00000188677 | 216254_at   | U133A |
| 135 Rn30010721 | 20.76 | ENSG00000188677 | 37965_at    | U133A |
| 134 Rn30007940 | 20.83 | ENSG00000175274 | 203421_at   | U133A |
| 134 Rn30007940 | 20.83 | ENSG00000175274 | 214667_s_at | U133A |
| 134 Rn30007940 | 20.83 | ENSG00000175274 | 216919_at   | U133A |
| 134 Rn30007940 | 20.83 | ENSG00000175274 | 203421_at   | U133A |



|                |                       |             |       |
|----------------|-----------------------|-------------|-------|
| 126 Rn30004128 | 25 ENSG00000046653    | 209167_at   | U133A |
| 126 Rn30004128 | 25 ENSG00000046653    | 209168_at   | U133A |
| 126 Rn30004128 | 25 ENSG00000046653    | 209169_at   | U133A |
| 126 Rn30004128 | 25 ENSG00000046653    | 209170_s_at | U133A |
| 125 Rn30002107 | 25.18 ENSG00000072210 | 202054_s_at | U133A |
| 125 Rn30002107 | 25.18 ENSG00000072210 | 202053_s_at | U133A |
| 125 Rn30002107 | 25.18 ENSG00000072210 | 210544_s_at | U133A |
| 125 Rn30002107 | 25.18 ENSG00000072210 | 202054_s_at | U133A |
| 125 Rn30002107 | 25.18 ENSG00000072210 | 202053_s_at | U133A |
| 125 Rn30002107 | 25.18 ENSG00000072210 | 210544_s_at | U133A |
| 124 Rn30003348 | 25.72 ENSG00000175183 | 207030_s_at | U133A |
| 124 Rn30003348 | 25.72 ENSG00000175183 | 211126_s_at | U133A |
| 123 Rn30001110 | 27.21 ENSG00000184674 | 203815_at   | U133A |
| 122 R000009_01 | 28.43 ENSG00000154269 | 219912_s_at | U133A |
| 122 R000009_01 | 28.43 ENSG00000154269 | 219912_s_at | U133A |
| 121 Rn30015053 | 29.07 ENSG00000137033 | 209821_at   | U133A |
| 120 Rn30005947 | 29.3 ENSG00000154978  | 208091_s_at | U133A |
| 119 Rn30019203 | 31.26 ENSG00000065989 | 211591_s_at | U133A |
| 119 Rn30019203 | 31.26 ENSG00000065989 | 211901_s_at | U133A |
| 119 Rn30019203 | 31.26 ENSG00000065989 | 204735_at   | U133A |
| 119 Rn30019203 | 31.26 ENSG00000065989 | 211447_s_at | U133A |
| 119 Rn30019203 | 31.26 ENSG00000065989 | 211591_s_at | U133A |
| 119 Rn30019203 | 31.26 ENSG00000065989 | 211901_s_at | U133A |
| 119 Rn30019203 | 31.26 ENSG00000065989 | 204735_at   | U133A |
| 119 Rn30019203 | 31.26 ENSG00000065989 | 211447_s_at | U133A |
| 119 Rn30019203 | 31.26 ENSG00000065989 | 211591_s_at | U133A |
| 119 Rn30019203 | 31.26 ENSG00000065989 | 211901_s_at | U133A |
| 119 Rn30019203 | 31.26 ENSG00000065989 | 204735_at   | U133A |
| 119 Rn30019203 | 31.26 ENSG00000065989 | 211447_s_at | U133A |
| 119 Rn30019203 | 31.26 ENSG00000065989 | 211591_s_at | U133A |
| 119 Rn30019203 | 31.26 ENSG00000065989 | 211901_s_at | U133A |
| 119 Rn30019203 | 31.26 ENSG00000065989 | 204735_at   | U133A |
| 119 Rn30019203 | 31.26 ENSG00000065989 | 211447_s_at | U133A |
| 115 Rn30016425 | 34.05 ENSG00000175567 | 208997_s_at | U133A |
| 115 Rn30016425 | 34.05 ENSG00000175567 | 208998_at   | U133A |
| 114 Rn30017678 | 34.52 ENSG00000116774 | 218162_at   | U133A |
| 113 Rn30010254 | 34.77 ENSG00000165801 | 220326_s_at | U133A |
| 113 Rn30010254 | 34.77 ENSG00000165801 | 220326_s_at | U133A |
| 113 Rn30010254 | 34.77 ENSG00000165801 | 220326_s_at | U133A |
| 113 Rn30010254 | 34.77 ENSG00000165801 | 220326_s_at | U133A |
| 112 R004671_01 | 36.36 ENSG00000107537 | 203335_at   | U133A |
| 111 Rn30013414 | 36.47 ENSG00000151835 | 213262_at   | U133A |
| 109 Rn30015480 | 37.47 ENSG00000159713 | 218876_at   | U133A |
| 109 Rn30015480 | 37.47 ENSG00000159713 | 218876_at   | U133A |
| 108 Rn30026198 | 39.96 ENSG00000135678 | 206100_at   | U133A |
| 107 Rn30004475 | 40.36 ENSG00000108961 | 218526_s_at | U133A |
| 107 Rn30004475 | 40.36 ENSG00000108961 | 218526_s_at | U133A |
| 107 Rn30004475 | 40.36 ENSG00000108961 | 218526_s_at | U133A |
| 106 Rn30004602 | 40.63 ENSG00000178498 | 221835_at   | U133A |
| 106 Rn30004602 | 40.63 ENSG00000178498 | 49049_at    | U133A |
| 106 Rn30004602 | 40.63 ENSG00000178498 | 49051_g_at  | U133A |

|                |       |                 |             |       |
|----------------|-------|-----------------|-------------|-------|
| 106 Rn30004602 | 40.63 | ENSG00000178498 | 221835_at   | U133A |
| 106 Rn30004602 | 40.63 | ENSG00000178498 | 49049_at    | U133A |
| 106 Rn30004602 | 40.63 | ENSG00000178498 | 49051_g_at  | U133A |
| 104 Rn30009392 | 42.53 | ENSG00000112773 | 221766_s_at | U133A |
| 104 Rn30009392 | 42.53 | ENSG00000112773 | 221766_s_at | U133A |
| 103 Rn30010542 | 43.07 | ENSG00000084628 | 219438_at   | U133A |
| 102 R004210_01 | 43.52 | ENSG00000140939 | 221566_s_at | U133A |
| 102 R004210_01 | 43.52 | ENSG00000140939 | 221567_at   | U133A |
| 102 R004210_01 | 43.52 | ENSG00000140939 | 59625_at    | U133A |
| 100 R002560_01 | 45.92 | ENSG00000104324 | 203501_at   | U133A |
| 100 R002560_01 | 45.92 | ENSG00000104324 | 208454_s_at | U133A |
| 100 R002560_01 | 45.92 | ENSG00000104324 | 203501_at   | U133A |
| 100 R002560_01 | 45.92 | ENSG00000104324 | 208454_s_at | U133A |
| 100 R002560_01 | 45.92 | ENSG00000104324 | 203501_at   | U133A |
| 100 R002560_01 | 45.92 | ENSG00000104324 | 208454_s_at | U133A |
| 100 R002560_01 | 45.92 | ENSG00000104324 | 203501_at   | U133A |
| 100 R002560_01 | 45.92 | ENSG00000104324 | 208454_s_at | U133A |
| 97 Rn30012118  | 47.12 | ENSG00000026297 | 217983_s_at | U133A |
| 97 Rn30012118  | 47.12 | ENSG00000026297 | 217984_at   | U133A |
| 97 Rn30012118  | 47.12 | ENSG00000026297 | 220096_at   | U133A |
| 97 Rn30012118  | 47.12 | ENSG00000026297 | 217983_s_at | U133A |
| 97 Rn30012118  | 47.12 | ENSG00000026297 | 217984_at   | U133A |
| 97 Rn30012118  | 47.12 | ENSG00000026297 | 220096_at   | U133A |
| 97 Rn30012118  | 47.12 | ENSG00000026297 | 217983_s_at | U133A |
| 97 Rn30012118  | 47.12 | ENSG00000026297 | 217984_at   | U133A |
| 97 Rn30012118  | 47.12 | ENSG00000026297 | 220096_at   | U133A |
| 97 Rn30012118  | 47.12 | ENSG00000026297 | 217983_s_at | U133A |
| 97 Rn30012118  | 47.12 | ENSG00000026297 | 217984_at   | U133A |
| 97 Rn30012118  | 47.12 | ENSG00000026297 | 220096_at   | U133A |
| 96 Rn30017297  | 47.21 | ENSG00000130479 | 218522_s_at | U133A |
| 96 Rn30017297  | 47.21 | ENSG00000130479 | 218522_s_at | U133A |
| 95 Rn30011009  | 47.95 | ENSG00000086300 | 218404_at   | U133A |
| 94 Rn30000016  | 48.13 | ENSG00000164647 | 205542_at   | U133A |
| 93 Rn30014662  | 49.6  | ENSG00000077782 | 207822_at   | U133A |
| 93 Rn30014662  | 49.6  | ENSG00000077782 | 207937_x_at | U133A |
| 93 Rn30014662  | 49.6  | ENSG00000077782 | 210973_s_at | U133A |
| 93 Rn30014662  | 49.6  | ENSG00000077782 | 211535_s_at | U133A |
| 93 Rn30014662  | 49.6  | ENSG00000077782 | 215404_x_at | U133A |
| 93 Rn30014662  | 49.6  | ENSG00000077782 | 222164_at   | U133A |
| 93 Rn30014662  | 49.6  | ENSG00000077782 | 207822_at   | U133A |
| 93 Rn30014662  | 49.6  | ENSG00000077782 | 207937_x_at | U133A |
| 93 Rn30014662  | 49.6  | ENSG00000077782 | 210973_s_at | U133A |
| 93 Rn30014662  | 49.6  | ENSG00000077782 | 211535_s_at | U133A |
| 93 Rn30014662  | 49.6  | ENSG00000077782 | 215404_x_at | U133A |
| 93 Rn30014662  | 49.6  | ENSG00000077782 | 222164_at   | U133A |
| 93 Rn30014662  | 49.6  | ENSG00000077782 | 207822_at   | U133A |
| 93 Rn30014662  | 49.6  | ENSG00000077782 | 207937_x_at | U133A |
| 93 Rn30014662  | 49.6  | ENSG00000077782 | 210973_s_at | U133A |
| 93 Rn30014662  | 49.6  | ENSG00000077782 | 211535_s_at | U133A |
| 93 Rn30014662  | 49.6  | ENSG00000077782 | 215404_x_at | U133A |
| 93 Rn30014662  | 49.6  | ENSG00000077782 | 222164_at   | U133A |
| 93 Rn30014662  | 49.6  | ENSG00000077782 | 207822_at   | U133A |
| 93 Rn30014662  | 49.6  | ENSG00000077782 | 207937_x_at | U133A |

|               |       |                 |             |       |
|---------------|-------|-----------------|-------------|-------|
| 93 Rn30014662 | 49.6  | ENSG00000077782 | 210973_s_at | U133A |
| 93 Rn30014662 | 49.6  | ENSG00000077782 | 211535_s_at | U133A |
| 93 Rn30014662 | 49.6  | ENSG00000077782 | 215404_x_at | U133A |
| 93 Rn30014662 | 49.6  | ENSG00000077782 | 222164_at   | U133A |
| 93 Rn30014662 | 49.6  | ENSG00000077782 | 207822_at   | U133A |
| 93 Rn30014662 | 49.6  | ENSG00000077782 | 207937_x_at | U133A |
| 93 Rn30014662 | 49.6  | ENSG00000077782 | 210973_s_at | U133A |
| 93 Rn30014662 | 49.6  | ENSG00000077782 | 211535_s_at | U133A |
| 93 Rn30014662 | 49.6  | ENSG00000077782 | 222164_at   | U133A |
| 93 Rn30014662 | 49.6  | ENSG00000077782 | 207822_at   | U133A |
| 93 Rn30014662 | 49.6  | ENSG00000077782 | 207937_x_at | U133A |
| 93 Rn30014662 | 49.6  | ENSG00000077782 | 210973_s_at | U133A |
| 93 Rn30014662 | 49.6  | ENSG00000077782 | 211535_s_at | U133A |
| 93 Rn30014662 | 49.6  | ENSG00000077782 | 222164_at   | U133A |
| 92 Rn30019558 | 52.92 | ENSG00000178096 | 214290_s_at | U133A |
| 92 Rn30019558 | 52.92 | ENSG00000178096 | 219345_at   | U133A |
| 91 Rn30007703 | 53.38 | ENSG00000137745 | 205959_at   | U133A |
| 91 Rn30007703 | 53.38 | ENSG00000137745 | 205959_at   | U133A |
| 91 Rn30007703 | 53.38 | ENSG00000137745 | 205959_at   | U133A |
| 91 Rn30007703 | 53.38 | ENSG00000137745 | 205959_at   | U133A |
| 90 R002771_01 | 53.63 | ENSG00000115525 | 203217_s_at | U133A |
| 89 Rn30014571 | 54.09 | ENSG00000141756 | 219249_s_at | U133A |
| 89 Rn30014571 | 54.09 | ENSG00000141756 | 219249_s_at | U133A |
| 89 Rn30014571 | 54.09 | ENSG00000141756 | 219249_s_at | U133A |
| 84 Rn30003792 | 60.17 | ENSG00000047230 | 219080_s_at | U133A |
| 84 Rn30003792 | 60.17 | ENSG00000047230 | 219080_s_at | U133A |
| 84 Rn30003792 | 60.17 | ENSG00000047230 | 219080_s_at | U133A |
| 84 Rn30003792 | 60.17 | ENSG00000047230 | 219080_s_at | U133A |
| 84 Rn30003792 | 60.17 | ENSG00000047230 | 219080_s_at | U133A |
| 84 Rn30003792 | 60.17 | ENSG00000047230 | 219080_s_at | U133A |
| 84 Rn30003792 | 60.17 | ENSG00000047230 | 219080_s_at | U133A |
| 84 Rn30003792 | 60.17 | ENSG00000047230 | 219080_s_at | U133A |
| 84 Rn30003792 | 60.17 | ENSG00000047230 | 219080_s_at | U133A |
| 83 R005290_01 | 61.34 | ENSG00000104723 | 209227_at   | U133A |
| 83 R005290_01 | 61.34 | ENSG00000104723 | 209228_x_at | U133A |
| 83 R005290_01 | 61.34 | ENSG00000104723 | 213423_x_at | U133A |
| 83 R005290_01 | 61.34 | ENSG00000104723 | 209227_at   | U133A |
| 83 R005290_01 | 61.34 | ENSG00000104723 | 209228_x_at | U133A |
| 83 R005290_01 | 61.34 | ENSG00000104723 | 213423_x_at | U133A |
| 82 Rn30007189 | 62.39 | ENSG00000059377 | 208130_s_at | U133A |
| 82 Rn30007189 | 62.39 | ENSG00000059377 | 208130_s_at | U133A |
| 81 Rn30016031 | 64.77 | ENSG00000070087 | 204992_s_at | U133A |
| 80 Rn30011946 | 64.81 | ENSG00000000971 | 213800_at   | U133A |
| 80 Rn30011946 | 64.81 | ENSG00000000971 | 213800_at   | U133A |
| 79 Rn30008139 | 68.06 | ENSG00000100276 | 206850_at   | U133A |
| 77 Rn30010107 | 71.38 | ENSG00000167779 | 203851_at   | U133A |
| 76 R004229_01 | 72.09 | ENSG00000163736 | 214146_s_at | U133A |
| 72 Rn30012016 | 75.83 | ENSG00000039319 | 203651_at   | U133A |
| 70 R000560_01 | 81.06 | ENSG00000137198 | 204187_at   | U133A |
| 69 Rn30006179 | 81.24 | ENSG00000006468 | 221910_at   | U133A |
| 69 Rn30006179 | 81.24 | ENSG00000006468 | 221911_at   | U133A |
| 69 Rn30006179 | 81.24 | ENSG00000006468 | 206501_x_at | U133A |
| 69 Rn30006179 | 81.24 | ENSG00000006468 | 217053_x_at | U133A |
| 69 Rn30006179 | 81.24 | ENSG00000006468 | 217061_s_at | U133A |

|               |       |                 |             |       |
|---------------|-------|-----------------|-------------|-------|
| 69 Rn30006179 | 81.24 | ENSG00000006468 | 206501_x_at | U133A |
| 69 Rn30006179 | 81.24 | ENSG00000006468 | 217053_x_at | U133A |
| 69 Rn30006179 | 81.24 | ENSG00000006468 | 217061_s_at | U133A |
| 68 Rn30016743 | 84.88 | ENSG00000165996 | 219654_at   | U133A |
| 67 R000417_01 | 86.38 | ENSG00000163430 | 208310_s_at | U133A |
| 67 R000417_01 | 86.38 | ENSG00000163430 | 208782_at   | U133A |
| 66 Rn30000612 | 87.97 | ENSG00000155962 | 213415_at   | U133A |
| 66 Rn30000612 | 87.97 | ENSG00000155962 | 213415_at   | U133A |
| 65 Rn30007100 | 89.71 | ENSG00000147592 | 218701_at   | U133A |
| 64 Rn30001117 | 89.75 | ENSG00000142156 | 212091_s_at | U133A |
| 64 Rn30001117 | 89.75 | ENSG00000142156 | 212937_s_at | U133A |
| 64 Rn30001117 | 89.75 | ENSG00000142156 | 212938_at   | U133A |
| 64 Rn30001117 | 89.75 | ENSG00000142156 | 212940_at   | U133A |
| 64 Rn30001117 | 89.75 | ENSG00000142156 | 213428_s_at | U133A |
| 63 Rn30023323 | 96.09 | ENSG00000106333 | 202465_at   | U133A |
| 62 Rn30008935 | 96.31 | ENSG00000099864 | 203859_s_at | U133A |
| 62 Rn30008935 | 96.31 | ENSG00000099864 | 203859_s_at | U133A |
| 61 Rn30004065 | 99.87 | ENSG00000108406 | 218277_s_at | U133A |
| 61 Rn30004065 | 99.87 | ENSG00000108406 | 218277_s_at | U133A |
| 59 R002343_01 | 105.4 | ENSG00000163623 | 221366_at   | U133A |
| 58 Rn30010084 | 111.8 | ENSG00000127920 | 204115_at   | U133A |
| 56 Rn30008927 | 116.4 | ENSG00000116157 | 213170_at   | U133A |
| 55 R001297_01 | 117.1 | ENSG00000111701 | 207158_at   | U133A |
| 55 R001297_01 | 117.1 | ENSG00000111701 | 207158_at   | U133A |
| 54 Rn30011238 | 119.2 | ENSG00000181449 | 213721_at   | U133A |
| 54 Rn30011238 | 119.2 | ENSG00000181449 | 213722_at   | U133A |
| 53 R002154_01 | 121   | ENSG00000169439 | 212154_at   | U133A |
| 53 R002154_01 | 121   | ENSG00000169439 | 212157_at   | U133A |
| 53 R002154_01 | 121   | ENSG00000169439 | 212158_at   | U133A |
| 52 Rn30015278 | 123   | ENSG00000068781 | 213413_at   | U133A |
| 52 Rn30015278 | 123   | ENSG00000068781 | 215306_at   | U133A |
| 52 Rn30015278 | 123   | ENSG00000068781 | 220190_s_at | U133A |
| 52 Rn30015278 | 123   | ENSG00000068781 | 213413_at   | U133A |
| 52 Rn30015278 | 123   | ENSG00000068781 | 220190_s_at | U133A |
| 52 Rn30015278 | 123   | ENSG00000068781 | 220190_s_at | U133A |
| 52 Rn30015278 | 123   | ENSG00000068781 | 220190_s_at | U133A |
| 51 Rn30009592 | 128.2 | ENSG00000173267 | 209877_at   | U133A |
| 48 Rn30021647 | 138.2 | ENSG00000075213 | 206805_at   | U133A |
| 47 Rn30000369 | 142.8 | ENSG00000168351 | 213081_at   | U133A |
| 46 Rn30002551 | 143.8 | ENSG00000162733 | 205168_at   | U133A |
| 45 Rn30001122 | 148.4 | ENSG00000142173 | 209156_s_at | U133A |
| 45 Rn30001122 | 148.4 | ENSG00000142173 | 213290_at   | U133A |
| 45 Rn30001122 | 148.4 | ENSG00000142173 | 209156_s_at | U133A |
| 45 Rn30001122 | 148.4 | ENSG00000142173 | 213290_at   | U133A |
| 45 Rn30001122 | 148.4 | ENSG00000142173 | 209156_s_at | U133A |
| 45 Rn30001122 | 148.4 | ENSG00000142173 | 213290_at   | U133A |
| 42 Rn30009625 | 173.5 | ENSG00000170522 | 204256_at   | U133A |
| 42 Rn30009625 | 173.5 | ENSG00000170522 | 210868_s_at | U133A |
| 41 Rn30013785 | 185   | ENSG00000055732 | 220484_at   | U133A |
| 41 Rn30013785 | 185   | ENSG00000055732 | 220484_at   | U133A |
| 40 R000904_01 | 192.6 | ENSG00000060982 | 214452_at   | U133A |
| 40 R000904_01 | 192.6 | ENSG00000060982 | 214390_s_at | U133A |
| 40 R000904_01 | 192.6 | ENSG00000060982 | 214452_at   | U133A |



|               |       |                 |             |       |
|---------------|-------|-----------------|-------------|-------|
| 10 Rn30019901 | 804.6 | ENSG00000068028 | 204346_s_at | U133A |
| 9 Rn30017920  | 870.9 | ENSG00000120318 | 218950_at   | U133A |
| 9 Rn30017920  | 870.9 | ENSG00000120318 | 218950_at   | U133A |
| 8 Rn30008150  | 933.4 | ENSG00000137571 | 220984_s_at | U133A |
| 7 R002414_01  | 1583  | ENSG00000125845 | 205289_at   | U133A |
| 7 R002414_01  | 1583  | ENSG00000125845 | 205290_s_at | U133A |
| 5 Rn30024757  | 1822  | ENSG00000197959 | 209839_at   | U133A |
| 5 Rn30024757  | 1822  | ENSG00000197959 | 209839_at   | U133A |
| 4 Rn30004616  | 1878  | ENSG00000174469 | 215145_s_at | U133A |
| 4 Rn30004616  | 1878  | ENSG00000174469 | 219300_s_at | U133A |
| 4 Rn30004616  | 1878  | ENSG00000174469 | 219301_s_at | U133A |
| 4 Rn30004616  | 1878  | ENSG00000174469 | 219302_s_at | U133A |
| 3 Rn30021962  | 1886  | ENSG00000166426 | 205350_at   | U133A |
| 2 R003362_01  | 1936  | ENSG00000173114 | 209840_s_at | U133A |
| 2 R003362_01  | 1936  | ENSG00000173114 | 209841_s_at | U133A |
| 1 Rn30001559  | 1974  | ENSG00000178772 | 216223_at   | U133A |
