# Supplementary material for: Dunning rat prostate adenocarcinomas and alternative splicing reporters: powerful tools to study epithelial plasticity in prostate tumors in vivo
Source: PubMed Central journal article supplement — Clin Exp Metastasis. 2008 Jun 4;25(6):611–9. doi: 10.1007/s10585-008-9186-y (PMC2471395; doi:10.1007/s10585-008-9186-y), 2008-06-04
Supplement: 10585_2008_9186_MOESM2_ESM.pdf [file 10585_2008_9186_MOESM2_ESM.pdf]

| Gene Name  | Fold change | Common                 | Genbank           |
|------------|-------------|------------------------|-------------------|
| Rn30001559 | 1,974       | Lib                    | AB071036          |
| R003362_01 | 1,936       | Nlrr3                  | AF291437          |
| Rn30021962 | 1,886       |                        | -                 |
| Rn30004616 | 1,878       |                        | -                 |
| Rn30024757 | 1,822       |                        | AF201839,AF201839 |
| Rn30022499 | 1,745       | Cc1-6                  | AY325240          |
| R002414_01 | 1,583       | Bmp2                   | Z25868            |
| Rn30008150 | 933.4       |                        | -                 |
| Rn30017920 | 870.9       |                        | -                 |
| Rn30019901 | 804.6       |                        | -                 |
| Rn30003434 | 738.4       | ECSODPT                | Z24721            |
| Rn30025247 | 683.9       |                        | -                 |
| Rn30006399 | 589.8       | Adhfe1                 | BC085821          |
| Rn30012022 | 563.9       |                        | -                 |
| Rn30001944 | 545.6       | OSP                    | BC078874          |
| Rn30009796 | 522.1       | Igfbp4                 | CO403206          |
| Rn30001746 | 498         |                        | -                 |
| Rn30013903 | 485.2       | RGD1306507_predicted   | CK601325          |
| Rn30012560 | 458.3       |                        | -                 |
| Rn30021879 | 453         |                        | -                 |
| R004421_01 | 384.8       | FBPase                 | AJ005046          |
| Rn30005916 | 381.1       | Cc1-6                  | AY325240          |
| Rn30000860 | 350.3       |                        | -                 |
| Rn30026188 | 333.4       |                        | -                 |
| Rn30002142 | 307.9       |                        | -                 |
| Rn30016138 | 305         |                        | X03369,X03369     |
| Rn30021949 | 291.9       | CCHLA2; Cacna2; DHSCCA | AF286488          |
| Rn30025465 | 288.9       |                        | -                 |
| Rn30007506 | 284.5       |                        | -                 |
| Rn30010234 | 279.5       | Twist                  | AF266260          |
| Rn30020069 | 252.7       | Tlr3                   | AB116229          |
| Rn30011518 | 243.3       |                        | -                 |
| Rn30001485 | 226.4       |                        | -                 |
| R002882_01 | 226.1       |                        | -                 |
| Rn30001991 | 215         |                        | -                 |
| Rn30006343 | 207         |                        | -                 |
| Rn30009842 | 196.7       |                        | -                 |
| R000904_01 | 192.6       |                        | AJ278701,AJ278701 |
| Rn30013785 | 185         | Mcoln3                 | BC079200          |
| Rn30009625 | 173.5       |                        | AB071986,AB071986 |
| Rn30025186 | 169.3       | Ctps2                  | BC085949          |
| Rn30014472 | 157         |                        | -                 |
| Rn30001122 | 148.4       |                        | -                 |
| Rn30002551 | 143.8       |                        | -                 |
| Rn30000369 | 142.8       |                        | -                 |
| Rn30021647 | 138.2       | Sema3a                 | X95286            |
| Rn30014938 | 136.4       |                        | -                 |
| Rn30009592 | 128.2       |                        | -                 |
| Rn30015278 | 123         | Salf                   | AY300793          |
| R002154_01 | 121         | HSPG                   | BC070890          |
| Rn30011238 | 119.2       |                        | -                 |
| R001297_01 | 117.1       |                        | -                 |

|            |                                |                   |
|------------|--------------------------------|-------------------|
| Rn30008927 | 116.4                          | -                 |
| Rn30024553 | 102.7                          | -                 |
| Rn30008935 | 96.31 Palm                     | BC072525          |
| Rn30023323 | 96.09 PCPE; MGC105446          | BC086572          |
| Rn30001117 | 89.75                          | -                 |
| Rn30007100 | 89.71                          | -                 |
| Rn30000612 | 87.97 MGC108828                | BC088182          |
| R000417_01 | 86.38 Frp; Fstl; MGC93410      | BC087014          |
| Rn30016743 | 84.88                          | -                 |
| Rn30006179 | 81.24                          | -                 |
| R000560_01 | 81.06                          | AF090867,AF090867 |
| Rn30010248 | 81.04 Snx25                    | BC086510          |
| Rn30005315 | 73.97 LAL; lal-1               | AF097723          |
| R004488_01 | 73.76 LOC246120                | BC086408          |
| Rn30006218 | 73.69                          | AF067650,AF067650 |
| Rn30010107 | 71.38                          | -                 |
| Rn30004652 | 68.93                          | -                 |
| Rn30016031 | 64.77 Pfn2                     | BC087013          |
| R005290_01 | 61.34 MGC94243                 | BC079193          |
| Rn30003792 | 60.17 Ctps2                    | BC085949          |
| Rn30011612 | 56.35                          | -                 |
| Rn30017669 | 55.81 Eya2                     | AY366465          |
| Rn30017262 | 54.81                          | -                 |
| Rn30017670 | 54.65 Eya2                     | AY366465          |
| Rn30014571 | 54.09 LOC360627                | BC085854          |
| R002771_01 | 53.63 Siat9                    | BC078798          |
| Rn30007703 | 53.38                          | M60616,M60616     |
| Rn30019558 | 52.92                          | -                 |
| Rn30014662 | 49.6                           | S54008,U58466     |
| Rn30000016 | 48.13                          | -                 |
| Rn30012118 | 47.12                          | -                 |
| R000391_01 | 46.06                          | -                 |
| R002560_01 | 45.92 LAL; lal-1               | AF097723          |
| Rn30014119 | 44.16                          | -                 |
| R004210_01 | 43.52 Arc                      | U40627            |
| Rn30001668 | 42.01                          | -                 |
| Rn30004602 | 40.63 RGD1566181_predicted     | BE106286          |
| Rn30015480 | 37.47                          | -                 |
| Rn30023707 | 36.7 Eya2                      | AY366465          |
| R004671_01 | 36.36 Phyh                     | BC086573          |
| Rn30016425 | 34.05 Ucp2                     | AB010743          |
| Rn30006914 | 33.69 Loxl3_predicted          | BF545077          |
| Rn30017668 | 33.21 Eya2                     | AY366465          |
| Rn30005947 | 29.3 RGD1306494_predicted      | CO394972          |
| Rn30015053 | 29.07 RGD1311155               | BC081993          |
| R000009_01 | 28.43 RB13-6                   | U78788            |
| Rn30001110 | 27.21                          | -                 |
| Rn30003348 | 25.72 SmLIM                    | BC086356          |
| Rn30002107 | 25.18 AHDC; Aldh; Ahd-c; Aldh3 | BC070924          |
| R000368_01 | 23.78 Vim                      | BC061847          |
| R002952_01 | 23.28 Il11ra1                  | BC070921          |
| Rn30017671 | 22.57 Eya2                     | AY366465          |
| Rn30017734 | 22.43 Gkap1                    | BC083717          |

|            |                 |                   |
|------------|-----------------|-------------------|
| R000728_01 | 21.66           | -                 |
| Rn30019807 | 21.22 Prr7      | CO559640          |
| Rn30007381 | 19.8 Galnt11    | BC062004          |
| R000456_01 | 18.82 MGC93704  | BC087039          |
| Rn30009632 | 18.49           | AB029342,AB029342 |
| Rn30013181 | 18.29           | -                 |
| Rn30006936 | 18.1            | -                 |
| R002730_01 | 17.69           | AB029342,AB029342 |
| Rn30005620 | 17.51           | -                 |
| Rn30017704 | 17.06           | -                 |
| R000576_01 | 16.49           | -                 |
| Rn30008771 | 14.9 Sna        | BC079210          |
| Rn30004186 | 14.26 Grb14     | AF076619          |
| R003839_01 | 14.09 Galnt7    | AF076167          |
| Rn30018506 | 14.07           | -                 |
| Rn30013562 | 13.62           | -                 |
| Rn30010961 | 13.5            | -                 |
| Rn30010405 | 13.32           | AF121217,AF121217 |
| Rn30002606 | 13.18           | -                 |
| R004282_01 | 13.16 Pc1; Npps | AF340186          |
| R002917_01 | 12.57           | AF320509,AF320509 |
| Rn30011013 | 12.34 Hbnf      | BC062013          |
| Rn30005395 | 12.22           | -                 |
| R000886_01 | 12.16 Adamts1   | AF149118          |
| Rn30006894 | 12.12 R1b       | BC079340          |
| Rn30007175 | 12.02 MGC105724 | BC088846          |
| Rn30010843 | 11.84 Blvra     | BC078766          |
| Rn30015774 | 11.56           | -                 |
| Rn30010801 | 11.52           | -                 |
| Rn30015798 | 11.13           | Y00090,Y00090     |
| Rn30011834 | 11.06           | -                 |
| Rn30019607 | 11.03           | -                 |
| Rn30012078 | 10.8 NSE; RNEN3 | AF019973          |
| Rn30008906 | 10.34 MGC91427  | BC080239          |
| Rn30014679 | 10.19           | -                 |
| Rn30023943 | 10.09 Rnase4    | BC070953          |
| R004040_01 | 9.989 Agc       | J03485            |
| Rn30012318 | 9.015           | AF026505,AF026505 |
| Rn30013790 | 8.703           | BQ205132,BQ205132 |
| Rn30012217 | 8.648 Arg1      | J02720            |
| Rn30012211 | 8.606           | -                 |
| Rn30012210 | 8.416           | -                 |
| Rn30015203 | 8.366           | -                 |
| Rn30006934 | 8.307           | -                 |
| R000949_01 | 8.072           | -                 |
| Rn30003565 | 7.981 Grip1     | U88572            |
| Rn30007654 | 7.567           | -                 |
| Rn30006341 | 7.385 MGC93738  | BC081876          |
| R004581_01 | 7.121 Heph      | AF246120          |
| Rn30007323 | 7.019           | -                 |
| Rn30014762 | 7.013           | X63744,X63744     |
| Rn30013792 | 6.95            | BQ205132,BQ205132 |
| Rn30016432 | 6.892           | U51583,U51583     |

|            |                        |                   |
|------------|------------------------|-------------------|
| R002918_01 | 6.832 Gch              | M58364            |
| Rn30006053 | 6.189                  | AF217964,AF217964 |
| Rn30014956 | 6.138                  | U16655,U16655     |
| Rn30002562 | 6.057                  | Y17295,Y17295     |
| Rn30022896 | 6.05                   | -                 |
| R003232_01 | 6.014 Cbp2; Serpinh2   | M69246            |
| Rn30018087 | 5.957 Col6a3_predicted | CF110984          |
| R003393_01 | 5.876 Sc65             | X65454            |
| Rn30008428 | 5.874 RGD1305890       | BC079082          |
| Rn30009062 | 5.84                   | -                 |
| Rn30014179 | 5.695                  | -                 |
| Rn30013530 | 5.657                  | -                 |
| R002303_01 | 5.629                  | X74593,AY387057   |
| R003618_01 | 5.618 GLUT3            | D13962            |
| Rn30017925 | 5.616                  | AB027562,AB027562 |
| Rn30014453 | 5.603 Sc65             | X65454            |
| Rn30015672 | 5.472                  | -                 |
| Rn30000387 | 5.395                  | -                 |
| Rn30010364 | 5.365                  | -                 |
| Rn30015961 | 5.173 MGC94903         | BC087127          |
| Rn30001622 | 4.97                   | -                 |
| Rn30009053 | 4.94                   | -                 |
| Rn30002821 | 4.897 Pedf; Dmrs91     | AY216659          |
| Rn30007102 | 4.81                   | -                 |
| R004516_01 | 4.795 Bambi            | BC070516          |
| Rn30009278 | 4.774                  | -                 |
| Rn30025297 | 4.733 Smit             | AY231162          |
| Rn30017416 | 4.675                  | -                 |
| Rn30005801 | 4.634                  | -                 |
| Rn30026452 | 4.621                  | M36410,M36410     |
| Rn30023383 | 4.616 Lrp1             | BC088327          |
| Rn30007911 | 4.606 Tbx3             | AY289619          |
| Rn30007653 | 4.586                  | -                 |
| R004570_01 | 4.574 MGC93227         | AB067572          |
| Rn30019247 | 4.574                  | -                 |
| Rn30014171 | 4.539                  | M36410,M36410     |
| Rn30019773 | 4.419 Slfn8            | BC085777          |
| Rn30010702 | 4.4 Mmaa_predicted     | BC079139          |
| Rn30016159 | 4.395                  | -                 |
| R003488_01 | 4.353 Hfe              | BC070942          |
| Rn30008491 | 4.351                  | Z11994,Z11994     |
| R000475_01 | 4.345 Dpp2             | AB048711          |
| Rn30011816 | 4.294 Add3             | U35775            |
| R004526_01 | 4.265                  | -                 |
| R002854_01 | 4.249 Wip              | BC072475          |
| R003502_01 | 4.18 5T4; MGC93332     | BC087011          |
| R000591_01 | 4.18 Ant1              | D12770            |
| Rn30019577 | 4.14 LOC499677         | BC087077          |
| Rn30009619 | 4.12                   | -                 |
| Rn30014283 | 4.052 MGC105573        | BC087688          |
| R002384_01 | 4.031 MGC124946        | BC086998          |
| Rn30005313 | 3.993                  | -                 |
| Rn30017269 | 3.964                  | -                 |

|            |                                            |               |
|------------|--------------------------------------------|---------------|
| Rn30024065 | 3.872                                      | -             |
| R000719_01 | 3.843 ELAI1; RATELAI1                      | V01234        |
| Rn30000538 | 3.843 MGC105573                            | BC087688      |
| Rn30019093 | 3.824                                      | -             |
| R000008_01 | 3.766                                      | Y17295,Y17295 |
| Rn30008879 | 3.761                                      | -             |
| Rn30008687 | 3.76                                       | -             |
| Rn30025198 | 3.759                                      | -             |
| Rn30018851 | 3.715                                      | -             |
| Rn30010888 | 3.664 Plekha3                              | BC083759      |
| Rn30026040 | 3.664                                      | -             |
| R000942_01 | 3.635                                      | -             |
| Rn30014276 | 3.627                                      | -             |
| Rn30014752 | 3.606                                      | -             |
| R000016_01 | 3.603                                      | J04628,J04628 |
| Rn30005136 | 3.569                                      | -             |
| Rn30017294 | 3.552 sgigsf                               | AB114443      |
| Rn30005980 | 3.533 Nedd4                                | U50842        |
| Rn30011807 | 3.53                                       | -             |
| Rn30026248 | 3.469                                      | -             |
| Rn30005021 | 3.42                                       | -             |
| Rn30003314 | 3.408 MGC94398                             | BC083622      |
| Rn30017195 | 3.387                                      | -             |
| R000806_01 | 3.305                                      | -             |
| Rn30010189 | 3.294                                      | -             |
| R000928_01 | 3.292 PHalpal                              | BC078703      |
| Rn30013825 | 3.286                                      | -             |
| Rn30015310 | 3.281                                      | -             |
| Rn30004547 | 3.257                                      | -             |
| Rn30001801 | 3.257                                      | -             |
| Rn30000888 | 3.254 Tj6; J6b7; Cc1-3                     | AY325239      |
| R003102_01 | 3.236 Pdi3                                 | D88034        |
| Rn30005325 | 3.235                                      | -             |
| Rn30002381 | 3.223 Ugdh                                 | AB013732      |
| Rn30022206 | 3.215 MGC93276                             | BC087003      |
| Rn30026788 | 3.195                                      | -             |
| Rn30006301 | 3.165                                      | -             |
| Rn30024806 | 3.121 Cbara1                               | BC062075      |
| R000985_01 | 3.095 p55cdc; MGC93111                     | BC085691      |
| Rn30005344 | 3.082                                      | -             |
| Rn30000765 | 3.045 MGC125193                            | BC078928      |
| Rn30025137 | 3.027                                      | -             |
| R002231_01 | 3.02 Dia4; MGC93075                        | J02679        |
| Rn30007649 | 2.999                                      | -             |
| Rn30016827 | 2.983 Rai14                                | BC085775      |
| Rn30014702 | 2.978                                      | -             |
| Rn30010398 | 2.973 spermatin                            | BC085803      |
| R002096_01 | 2.927 Sec1; NSEC1A; n-sec1; rbSec1; ANC18H | BC088850      |
| Rn30014839 | 2.913                                      | -             |
| Rn30017188 | 2.908 RGD1305464                           | BC089935      |
| Rn30017911 | 2.88                                       | -             |
| Rn30001003 | 2.866                                      | -             |
| Rn30002067 | 2.858                                      | -             |

|            |                            |                   |
|------------|----------------------------|-------------------|
| Rn30009885 | 2.857                      | -                 |
| Rn30014282 | 2.824                      | -                 |
| R001278_01 | 2.808 MGC93621             | BC081846          |
| Rn30006313 | 2.802                      | -                 |
| Rn30006122 | 2.797                      | -                 |
| Rn30008134 | 2.791                      | CK471765,BC062029 |
| Rn30021618 | 2.777                      | CO402779,AY325194 |
| R002962_01 | 2.771 Amd1a; Amd1b         | BC061532          |
| Rn30000212 | 2.768 MGC-24v              | BC062064          |
| Rn30004700 | 2.765                      | -                 |
| R004439_01 | 2.744 Scap55r              | BC070949          |
| Rn30008705 | 2.742                      | -                 |
| Rn30026847 | 2.738 Siva                 | BC088866          |
| Rn30018398 | 2.729                      | -                 |
| Rn30021441 | 2.728                      | -                 |
| Rn30008869 | 2.724 LMO7                 | AY533473          |
| Rn30004634 | 2.718 MGC94189             | BC079160          |
| Rn30024456 | 2.705                      | -                 |
| Rn30025308 | 2.699                      | -                 |
| Rn30007723 | 2.653 Lsm8_predicted       | CB314239          |
| Rn30021102 | 2.646                      | -                 |
| Rn30019599 | 2.645                      | -                 |
| Rn30021473 | 2.635                      | CO402779,AY325194 |
| R003377_01 | 2.619 Eif5                 | L11651            |
| Rn30026104 | 2.615 Ant2                 | BC059108          |
| Rn30021234 | 2.614                      | AY325194,CO402779 |
| Rn30010353 | 2.601                      | -                 |
| R004061_01 | 2.596                      | -                 |
| R003271_01 | 2.58 Tpt1                  | BF389894          |
| R004472_01 | 2.576 p18                  | BC088864          |
| R004331_01 | 2.534                      | M75148,M75148     |
| Rn30010849 | 2.52                       | -                 |
| Rn30025061 | 2.497                      | CO400246,BC085889 |
| Rn30011427 | 2.461 Appbp1               | U90829            |
| Rn30001436 | 2.44 Cct8_predicted        | CF110412          |
| R005038_01 | 2.437                      | -                 |
| Rn30017948 | 2.431                      | -                 |
| Rn30017601 | 2.427                      | -                 |
| Rn30015841 | 2.424                      | BC070958,M31178   |
| Rn30014810 | 2.42                       | -                 |
| Rn30003686 | 2.417                      | -                 |
| Rn30018461 | 2.407                      | -                 |
| Rn30010228 | 2.406                      | -                 |
| Rn30009911 | 2.399                      | -                 |
| Rn30019216 | 2.375 Gaml1                | CO402779          |
| Rn30003579 | 2.37                       | J03753,J03753     |
| Rn30005621 | 2.369 Glc1c; MGC93096      | BC081702          |
| Rn30017365 | 2.365                      | -                 |
| R000177_01 | 2.364 Rap7a; MGC72827      | U05334            |
| Rn30007022 | 2.364                      | -                 |
| Rn30001974 | 2.351                      | -                 |
| Rn30011749 | 2.349 MGC93724             | BC081873          |
| Rn30022118 | 2.339 MGC125015; MGC125015 | BC089822          |

|            |                            |                   |
|------------|----------------------------|-------------------|
| Rn30021641 | 2.321 Cdig2                | BC081716          |
| R000203_01 | 2.32 Lamp2                 | BC061990          |
| Rn30001973 | 2.307                      | -                 |
| Rn30026554 | 2.306 MGC93043             | BC070958          |
| Rn30000856 | 2.288                      | -                 |
| Rn30026480 | 2.283                      | -                 |
| Rn30025159 | 2.278                      | -                 |
| Rn30012682 | 2.266                      | -                 |
| Rn30006824 | 2.261                      | -                 |
| Rn30018091 | 2.259 Kcc1                 | U55815            |
| Rn30005652 | 2.249                      | -                 |
| Rn30018094 | 2.247 MGC109548            | BC090017          |
| R004010_01 | 2.244                      | -                 |
| R000683_01 | 2.241 Mta1                 | U02522            |
| R001070_01 | 2.237                      | -                 |
| Rn30014720 | 2.228                      | -                 |
| Rn30004188 | 2.213                      | -                 |
| Rn30021811 | 2.21                       | -                 |
| Rn30026780 | 2.206                      | -                 |
| Rn30011231 | 2.203 Mrg1; MGC93288       | BC087005          |
| Rn30016211 | 2.192                      | CK471765,BC062029 |
| R002449_01 | 2.192                      | AF110195,AF110195 |
| Rn30003530 | 2.183 Nqo3a2; MGC109264    | BC089945          |
| R000431_01 | 2.179 Pig1; PIG-1          | BC078743          |
| Rn30016020 | 2.177 MGC93799             | BC078949          |
| Rn30021336 | 2.172                      | -                 |
| Rn30017797 | 2.163                      | -                 |
| R002086_01 | 2.161 G6pd                 | BC081820          |
| Rn30001678 | 2.161                      | -                 |
| Rn30024728 | 2.16                       | -                 |
| Rn30016881 | 2.145 MGC95062; RGD1305524 | BC088431          |
| Rn30000486 | 2.142                      | -                 |
| R000442_01 | 2.138                      | -                 |
| Rn30007492 | 2.136 Decr1                | BC059120          |
| Rn30005361 | 2.108                      | -                 |
| R002637_01 | 2.108                      | AF021854,AF021854 |
| Rn30006511 | 2.106                      | -                 |
| Rn30017331 | 2.105                      | -                 |
| Rn30009759 | 2.104                      | -                 |
| Rn30018462 | 2.102                      | -                 |
| Rn30013456 | 2.099                      | -                 |
| Rn30010605 | 2.095                      | -                 |
| Rn30009840 | 2.093                      | -                 |
| Rn30014031 | 2.081                      | -                 |
| Rn30007917 | 2.078 Thrap4               | CK475406          |
| Rn30012332 | 2.075 Glclr                | BC078867          |
| Rn30026711 | 2.062                      | -                 |
| Rn30006579 | 2.061 MGC109063            | BC089888          |
| Rn30021184 | 2.056                      | -                 |
| Rn30010095 | 2.04 Ank                   | AF393241          |
| Rn30017143 | 2.039                      | -                 |
| Rn30016543 | 2.023 MGC94748             | BC083780          |
| Rn30019497 | 2.016                      | -                 |

|            |                          |                   |
|------------|--------------------------|-------------------|
| Rn30026451 | 2.011 RGD1305007         | BC088238          |
| Rn30018463 | 2.01                     | -                 |
| R001271_01 | 2.008 Pgm1               | L11694            |
| Rn30006760 | 0.497                    | -                 |
| Rn30014786 | 0.495 Qars; MGC94241     | BC082002          |
| Rn30012858 | 0.493                    | -                 |
| R002354_01 | 0.491                    | -                 |
| R000930_01 | 0.49 Aiar                | AF503514          |
| Rn30008117 | 0.489                    | -                 |
| Rn30025400 | 0.488                    | -                 |
| Rn30017412 | 0.487 Slc25a17_predicted | CF110611          |
| R002651_01 | 0.484                    | -                 |
| R000634_01 | 0.478                    | U57715,U57715     |
| R000046_01 | 0.476                    | -                 |
| Rn30017470 | 0.474 Grk2; BARK1; GRK-2 | M87854            |
| R004289_01 | 0.472 Sh3d3              | BC062400          |
| Rn30017611 | 0.467                    | CK595823,BC083895 |
| Rn30022620 | 0.467                    | -                 |
| Rn30016917 | 0.467                    | -                 |
| Rn30005874 | 0.466                    | -                 |
| Rn30026944 | 0.462 Fat                | AF100960          |
| R001975_01 | 0.462                    | Y13588,Y13588     |
| Rn30026524 | 0.462                    | -                 |
| R004412_01 | 0.46                     | -                 |
| Rn30018204 | 0.459                    | -                 |
| Rn30003094 | 0.458                    | -                 |
| Rn30011857 | 0.457                    | -                 |
| Rn30013927 | 0.457                    | -                 |
| R002712_01 | 0.456                    | AF009330,AF009330 |
| Rn30026564 | 0.451 Alkbh5_predicted   | CA512055          |
| Rn30012532 | 0.45                     | BC078801          |
| Rn30009229 | 0.446                    | -                 |
| Rn30014565 | 0.446                    | -                 |
| Rn30010540 | 0.439                    | -                 |
| R003023_01 | 0.437                    | -                 |
| Rn30018531 | 0.435 Lsc; MGC108950     | BC078338          |
| R004115_01 | 0.434 Lsc; MGC108950     | BC078338          |
| Rn30010055 | 0.434                    | -                 |
| Rn30016750 | 0.427 Bok                | BC078871          |
| Rn30011937 | 0.425 Sh3glb1            | BC079085          |
| Rn30001160 | 0.425                    | -                 |
| Rn30020832 | 0.422                    | -                 |
| Rn30015286 | 0.421                    | -                 |
| Rn30002431 | 0.419                    | -                 |
| Rn30019017 | 0.419                    | -                 |
| Rn30001583 | 0.418                    | -                 |
| Rn30022611 | 0.417                    | -                 |
| Rn30009436 | 0.417                    | Y13588,Y13588     |
| Rn30011206 | 0.417 Mpdu1              | BC087071          |
| Rn30003635 | 0.416 MGC105318          | AB097077          |
| Rn30017097 | 0.416                    | -                 |
| Rn30014409 | 0.408 SLAM; MGC93588     | BC088400          |
| Rn30016829 | 0.408                    | -                 |



|            |                                                       |                   |
|------------|-------------------------------------------------------|-------------------|
| Rn30009004 | 0.406 Nix                                             | AB077364          |
| Rn30015077 | 0.406                                                 | -                 |
| Rn30013203 | 0.404                                                 | -                 |
| Rn30011393 | 0.403 Inpp1                                           | BC086600          |
| Rn30010727 | 0.401 RGD1306064_predicted                            | CO564554          |
| Rn30018515 | 0.4 MGC95128                                          | BC088469          |
| Rn30006448 | 0.4 MGC105762                                         | BC087628          |
| Rn30016093 | 0.4                                                   | -                 |
| Rn30000942 | 0.396                                                 | -                 |
| R001366_01 | 0.389                                                 | -                 |
| Rn30015692 | 0.389                                                 | -                 |
| Rn30009263 | 0.382                                                 | -                 |
| Rn30015761 | 0.382 PFK-C; MGC105718                                | BC088847          |
| Rn30005722 | 0.381                                                 | -                 |
| Rn30025256 | 0.381                                                 | -                 |
| Rn30015753 | 0.379                                                 | -                 |
| Rn30016418 | 0.378 Ctl1                                            | AJ420809          |
| Rn30026196 | 0.377                                                 | -                 |
| R002638_01 | 0.377 Anx4; MGC93088                                  | BC085688          |
| Rn30016916 | 0.377 MGC109410                                       | BC089987          |
| Rn30011288 | 0.375 RGD1566257_predicted                            | CK602235          |
| Rn30001045 | 0.374                                                 | -                 |
| Rn30016229 | 0.373 Inpp4a                                          | U26397            |
| Rn30023684 | 0.371                                                 | -                 |
| R003274_01 | 0.365 Bdh; MGC94818                                   | BC085916          |
| Rn30003329 | 0.362                                                 | BC085118,CV076110 |
| Rn30004234 | 0.361                                                 | BF567816,BF567816 |
| Rn30015653 | 0.359                                                 | -                 |
| Rn30002203 | 0.353 dRalb                                           | BC072505          |
| Rn30026286 | 0.351                                                 | -                 |
| Rn30016859 | 0.349                                                 | -                 |
| Rn30014552 | 0.343                                                 | -                 |
| Rn30013725 | 0.342                                                 | -                 |
| Rn30009331 | 0.341                                                 | -                 |
| Rn30000534 | 0.341                                                 | -                 |
| Rn30009553 | 0.34                                                  | -                 |
| Rn30020391 | 0.339                                                 | -                 |
| Rn30010146 | 0.338 MIBP1                                           | D37951            |
| Rn30001129 | 0.337                                                 | -                 |
| Rn30000551 | 0.336 MGC105657                                       | BC086518          |
| Rn30001558 | 0.336 Hes1                                            | L04527            |
| Rn30019556 | 0.334 Mark2                                           | Z83869            |
| Rn30008273 | 0.33 RGD1359684                                       | BC088274          |
| R001676_01 | 0.326                                                 | -                 |
| Rn30012821 | 0.323 Itpkc                                           | AY160770          |
| Rn30019701 | 0.319 Gbp                                             | AY216677          |
| Rn30009569 | 0.318                                                 | CK602086          |
| Rn30000695 | 0.317                                                 | -                 |
| Rn30010288 | 0.317                                                 | -                 |
| Rn30009267 | 0.317                                                 | -                 |
| Rn30006408 | 0.316 XOR                                             | J05579            |
| Rn30014857 | 0.315                                                 | -                 |
| Rn30018044 | 0.315 p44; ERK1; Erk-1; Esrk1; Prkm3; p44erk1; M61177 |                   |

|            |                                      |                   |
|------------|--------------------------------------|-------------------|
| Rn30011717 | 0.315                                | -                 |
| Rn30021015 | 0.313                                | -                 |
| Rn30018643 | 0.312                                | CV076110,BC085118 |
| Rn30016668 | 0.312                                | -                 |
| Rn30012562 | 0.308 Capg                           | BC079104          |
| Rn30010578 | 0.303                                | -                 |
| R004525_01 | 0.302                                | -                 |
| Rn30001064 | 0.301                                | -                 |
| Rn30010459 | 0.3                                  | -                 |
| Rn30006296 | 0.297 Psg4                           | BC061822          |
| Rn30018936 | 0.295                                | -                 |
| Rn30014962 | 0.295                                | AF407168,AF407168 |
| Rn30018247 | 0.293 MGC105966                      | BC085337          |
| R003483_01 | 0.292 Mark2                          | Z83869            |
| Rn30020311 | 0.291                                | -                 |
| Rn30002214 | 0.291                                | -                 |
| Rn30013444 | 0.288 Lmo3                           | BF420066          |
| R002625_01 | 0.288 Jak2                           | U13396            |
| R002761_01 | 0.288                                | AF321552,AF321552 |
| Rn30015393 | 0.286                                | -                 |
| R000334_01 | 0.283 H218; GPCR18; Gpcr13; snGPCR18 | U10699            |
| Rn30024645 | 0.279                                | -                 |
| Rn30010994 | 0.278 Smarca2                        | AY643746          |
| Rn30007416 | 0.277                                | -                 |
| Rn30020658 | 0.272                                | -                 |
| Rn30025834 | 0.27                                 | -                 |
| Rn30021417 | 0.27                                 | -                 |
| Rn30013800 | 0.27                                 | -                 |
| R005646_01 | 0.269                                | -                 |
| R000557_01 | 0.266                                | -                 |
| R001079_01 | 0.265 MGC108717                      | D16300            |
| R004548_01 | 0.263                                | AF407168,AF407168 |
| Rn30014253 | 0.26                                 | -                 |
| Rn30015754 | 0.256 Nck2_predicted                 | AY724492          |
| Rn30007158 | 0.254                                | -                 |
| Rn30006692 | 0.254 Nfkbia                         | CF111061          |
| Rn30008228 | 0.251 Rtkn                           | AY348867          |
| Rn30002599 | 0.251 Ppl_predicted                  | CF110489          |
| Rn30026309 | 0.245                                | -                 |
| R002177_01 | 0.245 Hri                            | BC081838          |
| R002057_01 | 0.244 PDGFACP                        | BC061731          |
| Rn30020475 | 0.243                                | -                 |
| Rn30006722 | 0.243 Vav2_predicted                 | CA511616          |
| Rn30023813 | 0.243                                | -                 |
| Rn30001607 | 0.24 MGC94214                        | BC085825          |
| R004498_01 | 0.24                                 | AJ494720,AJ494720 |
| Rn30021406 | 0.238                                | -                 |
| Rn30001596 | 0.237                                | -                 |
| Rn30010662 | 0.234 MGC93243                       | BC081741          |
| Rn30005756 | 0.233 Erbb2                          | AY116182          |
| R002183_01 | 0.233 CLP36                          | BC072465          |
| R002913_01 | 0.228 An; Agl; Pc3; an-1; Tis21      | M60921            |
| Rn30018112 | 0.227                                | -                 |

|            |                          |               |
|------------|--------------------------|---------------|
| Rn30006415 | 0.226 Prsc1; MGC105274   | BC087708      |
| Rn30026671 | 0.223                    | -             |
| R003979_01 | 0.222 Casp7              | BC070936      |
| Rn30026117 | 0.218 Pls3               | AY548831      |
| R003960_01 | 0.218 Csf3               | U37101        |
| Rn30017303 | 0.218                    | -             |
| Rn30002475 | 0.218                    | -             |
| Rn30018223 | 0.215 Pcdhgb7            | BC087084      |
| Rn30011439 | 0.215                    | -             |
| Rn30010833 | 0.212                    | -             |
| R000567_01 | 0.211 PrP; Prn           | BC072692      |
| Rn30017812 | 0.21                     | -             |
| Rn30009482 | 0.21 Ctsb                | BC072490      |
| Rn30002489 | 0.208                    | -             |
| Rn30008321 | 0.207                    | -             |
| Rn30023055 | 0.202                    | -             |
| Rn30007435 | 0.19                     | -             |
| Rn30013618 | 0.185                    | -             |
| Rn30014274 | 0.184                    | -             |
| Rn30019190 | 0.183                    | -             |
| Rn30013076 | 0.178                    | U22830,U22830 |
| Rn30008306 | 0.176 F52; Mlp; MGC93399 | BC081789      |
| Rn30014166 | 0.176 KIAA1536; MGC93160 | AY078385      |
| Rn30006314 | 0.176                    | -             |
| R004288_01 | 0.176                    | -             |
| Rn30015950 | 0.174                    | -             |
| Rn30011973 | 0.174                    | -             |
| Rn30024903 | 0.172 Cxcl16             | BC079312      |
| R002614_01 | 0.171 Msln               | D87351        |
| Rn30019191 | 0.169                    | -             |
| Rn30006778 | 0.165                    | -             |
| Rn30003786 | 0.155                    | -             |
| Rn30016272 | 0.155                    | -             |
| Rn30017686 | 0.151                    | -             |
| Rn30017362 | 0.149 CHT1; CHOT1        | X66494        |
| R003030_01 | 0.145                    | -             |
| Rn30010451 | 0.144                    | -             |
| Rn30008529 | 0.142                    | -             |
| R000670_01 | 0.141 Alcam              | AB008538      |
| Rn30024973 | 0.14                     | -             |
| Rn30013137 | 0.14                     | U77038,U77038 |
| Rn30003533 | 0.139                    | X84004,X84004 |
| Rn30018004 | 0.136 Cd9                | CF111078      |
| R002744_01 | 0.136 Ncs1               | X82188        |
| Rn30017105 | 0.131 Alrp; Carp; Crap   | BC072699      |
| Rn30011109 | 0.13                     | -             |
| Rn30004838 | 0.126                    | -             |
| Rn30012936 | 0.126                    | -             |
| R004970_01 | 0.123                    | -             |
| Rn30026577 | 0.122                    | -             |
| Rn30020842 | 0.117                    | -             |
| Rn30021321 | 0.115 Ppp2r3a            | BC087097      |
| Rn30014463 | 0.114                    | -             |

|            |                                              |                              |
|------------|----------------------------------------------|------------------------------|
| Rn30002459 | 0.11 Areg                                    | X55183                       |
| R005118_01 | 0.11                                         | -                            |
| Rn30015241 | 0.107 Ngef; Besh3                            | BC078722                     |
| R000153_01 | 0.101                                        | -                            |
| Rn30006667 | 0.1 Casp4                                    | BC089095                     |
| Rn30000647 | 0.0985                                       | -                            |
| Rn30009744 | 0.0984 LOC619558                             | BC089887                     |
| Rn30007736 | 0.0909 Cdc42ep1_predicted                    | CK601492                     |
| Rn30004524 | 0.0902 CRP2                                  | BC061774                     |
| R002247_01 | 0.0847 Jup                                   | BC065580                     |
| Rn30018154 | 0.0842                                       | -                            |
| Rn30021987 | 0.0827 Etr3                                  | AJ010351                     |
| Rn30006695 | 0.0818 Ndr1                                  | BC081898                     |
| R002705_01 | 0.0815 Pygl                                  | BC070901                     |
| Rn30004833 | 0.0795                                       | -                            |
| Rn30004335 | 0.0782                                       | -                            |
| Rn30012805 | 0.0754                                       | U70050,U70050                |
| Rn30004826 | 0.0745                                       | AB015308,AB015308            |
| Rn30012112 | 0.0742                                       | AB050717,AB050717            |
| Rn30007881 | 0.0731 Cd56; Ncam; N-CAM; NCAM-C; MGC1246    | X06564                       |
| Rn30019388 | 0.072                                        | -                            |
| Rn30015909 | 0.0693 MGC94216                              | BC079179                     |
| R000593_01 | 0.0665                                       | L20319,L20319                |
| Rn30022545 | 0.0652                                       | -                            |
| Rn30011157 | 0.063                                        | -                            |
| Rn30007479 | 0.0615                                       | -                            |
| Rn30018951 | 0.061 LOC500956                              | BC086569                     |
| Rn30015057 | 0.0603 CLI; APOJ; SGP2; SGP-2; SP-40; Trpm2; | M16975                       |
| Rn30014138 | 0.06                                         | -                            |
| Rn30007883 | 0.0562 Cd56; Ncam; N-CAM; NCAM-C; MGC1246    | X06564                       |
| Rn30025052 | 0.0551                                       | BC059164,BC082068,CO384198,C |
| Rn30012800 | 0.0538                                       | -                            |
| Rn30007882 | 0.0532 Cd56; Ncam; N-CAM; NCAM-C; MGC1246    | X06564                       |
| Rn30013935 | 0.0522                                       | -                            |
| Rn30008671 | 0.0466                                       | -                            |
| Rn30022364 | 0.0454                                       | CO384198,BC082068            |
| Rn30022314 | 0.0452                                       | CO384198,BC082068            |
| Rn30024846 | 0.0392                                       | BC082068,CO384198,BG664185,F |
| Rn30008035 | 0.0375 ASSA; Ass1                            | BC063146                     |
| Rn30017364 | 0.0346                                       | -                            |
| Rn30015093 | 0.0339 CATC                                  | D90404                       |
| Rn30015661 | 0.032                                        | -                            |
| Rn30016337 | 0.0317                                       | -                            |
| Rn30011158 | 0.0293                                       | -                            |
| Rn30010992 | 0.0286 Smarca2                               | AY643746                     |
| Rn30022367 | 0.0264                                       | -                            |
| Rn30020111 | 0.0249                                       | -                            |
| Rn30016279 | 0.0242                                       | -                            |
| Rn30015687 | 0.0239                                       | M31155,M31155                |
| R003599_01 | 0.0233 IL-1ra                                | BC070930                     |
| Rn30013382 | 0.0232                                       | -                            |
| Rn30018658 | 0.0231 Anxa8                                 | CF110971                     |
| Rn30000606 | 0.023 RT1-CE5; rt1-E2; RT1-C/E5; MGC112896   | AJ537441                     |

|            |                              |                            |
|------------|------------------------------|----------------------------|
| Rn30013264 | 0.0207                       | -                          |
| Rn30007593 | 0.0203                       | -                          |
| Rn30023005 | 0.0191 Obl; Gllg15b          | AF492685                   |
| Rn30002555 | 0.0183 MCH-B; SMemb; NMMHC-B | AF139055                   |
| Rn30001864 | 0.0181                       | -                          |
| Rn30012059 | 0.0171                       | -                          |
| Rn30003637 | 0.017                        | -                          |
| Rn30001869 | 0.0168 Igfbp7                | BC086582                   |
| Rn30015171 | 0.0166                       | -                          |
| Rn30002331 | 0.0166                       | -                          |
| Rn30010607 | 0.0165                       | -                          |
| Rn30011741 | 0.0161                       | -                          |
| Rn30024585 | 0.0161                       | -                          |
| Rn30024431 | 0.016                        | -                          |
| Rn30006086 | 0.016                        | -                          |
| Rn30015015 | 0.0154                       | -                          |
| Rn30006271 | 0.0153 Nfia                  | X84209                     |
| Rn30004886 | 0.0149 RGD1308796_predicted  | CK475948                   |
| Rn30017296 | 0.0142                       | -                          |
| Rn30017146 | 0.0138                       | -                          |
| Rn30010991 | 0.0134 Smarca2               | AY643746                   |
| Rn30010995 | 0.013 Smarca2                | AY643746                   |
| Rn30008385 | 0.0125                       | -                          |
| R001154_01 | 0.0123 R; Ruby               | BC070513                   |
| R000644_01 | 0.0119                       | -                          |
| Rn30003876 | 0.0116 Notch3                | AF164486                   |
| Rn30009785 | 0.0115                       | -                          |
| Rn30018956 | 0.0112 Tbx2r                 | D32080                     |
| Rn30017685 | 0.0111                       | -                          |
| Rn30002325 | 0.0105                       | -                          |
| R004616_01 | 0.0105                       | AB113398,AB113393,AB113391 |
| Rn30013845 | 0.0105                       | -                          |
| Rn30013833 | 0.00998                      | -                          |
| Rn30014836 | 0.00997 Casq2                | BC072547                   |
| Rn30016464 | 0.00984                      | -                          |
| Rn30016581 | 0.00976                      | -                          |
| Rn30023687 | 0.00961                      | -                          |
| Rn30022292 | 0.00854                      | -                          |
| Rn30011243 | 0.00854                      | -                          |
| Rn30011615 | 0.0085                       | AJ243304,AJ243304          |
| Rn30006564 | 0.00842 RGD1562149_predicted | CO566804                   |
| Rn30013645 | 0.00842                      | -                          |
| Rn30001289 | 0.00832                      | AF095576,AF095576          |
| Rn30008664 | 0.00823                      | -                          |
| Rn30000172 | 0.00819 Mct7B; MGC94224      | BC081999                   |
| Rn30017762 | 0.00788                      | -                          |
| Rn30001340 | 0.00775 Cldn4                | BC083582                   |
| Rn30019107 | 0.00748 Ppfia3               | AY057065                   |
| Rn30023521 | 0.00736                      | -                          |
| R002544_01 | 0.00709                      | AF276998,AF276998          |
| Rn30021925 | 0.00697 Cfi                  | BC089798                   |
| Rn30015221 | 0.00694                      | -                          |
| Rn30013917 | 0.00685 MGC109225            | BC089933                   |

|            |                               |               |
|------------|-------------------------------|---------------|
| Rn30018522 | 0.00684                       | -             |
| Rn30011932 | 0.00642 Lrig1_predicted       | CA511514      |
| R005084_01 | 0.00636                       | -             |
| R004637_01 | 0.00631 Lirf; Hzfw1           | AB070897      |
| R004676_01 | 0.0062 Ucn3                   | AY044835      |
| Rn30006752 | 0.0061 Aloxe3_predicted       | AW919146      |
| Rn30023175 | 0.00606                       | -             |
| Rn30017907 | 0.00563                       | -             |
| Rn30022439 | 0.00561                       | -             |
| Rn30010640 | 0.00561                       | -             |
| Rn30017273 | 0.00559 Mpp7                  | BC085813      |
| Rn30022556 | 0.00546                       | -             |
| Rn30012564 | 0.00545                       | -             |
| R000695_01 | 0.00537                       | -             |
| Rn30014303 | 0.00533                       | -             |
| Rn30013300 | 0.0053 Rfx3                   | BC085953      |
| Rn30001010 | 0.00527                       | -             |
| Rn30015388 | 0.00522                       | -             |
| Rn30022412 | 0.00506                       | -             |
| Rn30025571 | 0.00505                       | -             |
| Rn30023302 | 0.00503                       | -             |
| Rn30007196 | 0.005 Pak6_predicted          | CB726714      |
| Rn30004629 | 0.00487 RGD1310286            | BC079201      |
| Rn30024035 | 0.00483 LOC690130             | CO574777      |
| Rn30021627 | 0.00481                       | -             |
| Rn30008498 | 0.00467 RGD1311249            | BC087107      |
| Rn30013895 | 0.00457                       | -             |
| Rn30007032 | 0.0044 Prp1; MGC72570         | BC060519      |
| Rn30017442 | 0.00437 Wdr59                 | CO396956      |
| Rn30022401 | 0.00429                       | -             |
| Rn30024330 | 0.00426                       | D63648,D63648 |
| Rn30004561 | 0.00422                       | -             |
| R001475_01 | 0.00414                       | -             |
| Rn30006652 | 0.00414                       | -             |
| Rn30000707 | 0.00407                       | -             |
| Rn30012974 | 0.00406                       | -             |
| Rn30021969 | 0.00396                       | -             |
| Rn30018862 | 0.00386                       | -             |
| Rn30007885 | 0.00386 LOC298795; MGC108952  | BC089860      |
| R004748_01 | 0.00382 Fgf21                 | AB078901      |
| Rn30015497 | 0.00379                       | -             |
| Rn30007813 | 0.00366                       | -             |
| Rn30018730 | 0.00362                       | -             |
| Rn30001854 | 0.0035                        | -             |
| Rn30009546 | 0.00333 Nrg1                  | U02318        |
| Rn30009708 | 0.00333                       | -             |
| Rn30008049 | 0.0033 Cx26; CXN-26; MGC93804 | BC078952      |
| Rn30009103 | 0.00328                       | -             |
| Rn30008016 | 0.00321                       | -             |
| Rn30022260 | 0.0032                        | -             |
| Rn30019427 | 0.00307 Lisch7; MGC124592     | AF119667      |
| R003349_01 | 0.00305 C4.4a                 | AJ001043      |
| R001389_01 | 0.00305 Stxbp2                | U20283        |

|            |                              |                   |
|------------|------------------------------|-------------------|
| Rn30009100 | 0.00304                      | -                 |
| Rn30026433 | 0.00297 LOC304000            | BC086342          |
| Rn30014590 | 0.00297                      | -                 |
| R000142_01 | 0.00296 Cdh1                 | AB017696          |
| Rn30006303 | 0.00288 MGC93307             | BC081757          |
| Rn30026570 | 0.00281                      | -                 |
| Rn30019047 | 0.00276                      | -                 |
| Rn30010267 | 0.00275 RGD1309676           | BC079275          |
| Rn30012962 | 0.00267 Myr6                 | U60416            |
| Rn30005274 | 0.00266                      | -                 |
| Rn30011092 | 0.00262 Pc5                  | L14933            |
| Rn30014690 | 0.0026                       | CB544284          |
| Rn30005157 | 0.0026                       | -                 |
| Rn30012050 | 0.00258                      | AF276940,AF276940 |
| Rn30013066 | 0.00251                      | -                 |
| Rn30011805 | 0.00247 HAI-1                | AB154834          |
| Rn30012655 | 0.00242                      | -                 |
| R004253_01 | 0.0024 Bft                   | BC061966          |
| Rn30024290 | 0.0024                       | -                 |
| R003824_01 | 0.00236                      | AF269251,AF269251 |
| R001461_01 | 0.0023 Mmp9                  | U24441            |
| Rn30021444 | 0.00229                      | -                 |
| Rn30014487 | 0.00225                      | -                 |
| Rn30019070 | 0.00221                      | -                 |
| Rn30014278 | 0.00219                      | -                 |
| Rn30017308 | 0.00219                      | -                 |
| Rn30025669 | 0.00217                      | -                 |
| Rn30012707 | 0.00216 RGD1308358_predicted | CK473626          |
| Rn30018529 | 0.00213                      | -                 |
| Rn30022963 | 0.00212                      | AB000216,AB000216 |
| Rn30012181 | 0.00209                      | -                 |
| Rn30003023 | 0.00209 CAMGAP1; Arhgap15    | AY394725          |
| Rn30007148 | 0.00208                      | -                 |
| Rn30007493 | 0.00206 Unc13h2; Munc13-2    | U24071            |
| Rn30021771 | 0.00206                      | -                 |
| Rn30021104 | 0.00197                      | -                 |
| Rn30002235 | 0.00197                      | -                 |
| Rn30010526 | 0.00195                      | -                 |
| Rn30002646 | 0.00194 Cacna1g              | AF027984          |
| R002984_01 | 0.0019 MGC108624             | BC088122          |
| Rn30014357 | 0.00185                      | AJ001044,AJ001044 |
| Rn30008335 | 0.00181                      | -                 |
| R001440_01 | 0.00175                      | U21954,U21954     |
| Rn30013939 | 0.00167                      | -                 |
| Rn30024313 | 0.00155                      | -                 |
| Rn30010401 | 0.00153                      | -                 |
| Rn30015111 | 0.00153 Mbp                  | AF439750          |
| Rn30016856 | 0.00153 RGD1562089_predicted | AW917067          |
| Rn30018357 | 0.0015 Twik                  | BC061807          |
| Rn30005930 | 0.00147                      | -                 |
| Rn30016113 | 0.00144 Zyx                  | BF401563          |
| Rn30006223 | 0.00143                      | -                 |
| Rn30026827 | 0.0014                       | -                 |

|            |                               |                   |
|------------|-------------------------------|-------------------|
| Rn30007578 | 0.0014 MGC94023               | BC079069          |
| R002400_01 | 0.00138 IL-1 alpha            | D00403            |
| Rn30003465 | 0.00136                       | -                 |
| Rn30008703 | 0.0013                        | -                 |
| R004125_01 | 0.00123                       | -                 |
| Rn30019330 | 0.0012 Cgn_predicted          | CK596641          |
| R003409_01 | 0.00115                       | -                 |
| Rn30006161 | 0.00115 Zfp339_predicted      | CB799511          |
| Rn30012778 | 0.00114                       | -                 |
| Rn30024525 | 0.00107                       | -                 |
| Rn30023211 | 0.00107                       | -                 |
| Rn30019995 | 0.000992                      | -                 |
| Rn30003551 | 0.000943                      | M55075,M55075     |
| Rn30026942 | 0.000906 Cyp2c39              | M18335            |
| Rn30020141 | 0.000884                      | -                 |
| Rn30005290 | 0.00077                       | AB049189,AB049189 |
| Rn30024342 | 0.000577 RT1-Aw2              | CO574843          |
| Rn30018124 | 0.000558                      | -                 |
| Rn30013811 | 0.000545 RGD1559450_predicted | CV110855          |
| Rn30013710 | 0.000504                      | -                 |
| Rn30009577 | 0.000454                      | -                 |
| Rn30018561 | 0.00034                       | -                 |
